# Supplementary material for: Polyoxygenated cyathane diterpenoids from the mushroom Cyathus africanus, and their neurotrophic and anti-neuroinflammatory activities
Source: PubMed Central journal article supplement (PMC5794895; doi:10.1038/s41598-018-20472-4), 2018-02-01
Supplement: 41598_2018_20472_MOESM1_ESM.pdf [file 41598_2018_20472_MOESM1_ESM.pdf]

# Polyoxygenated cyathane diterpenoids from the mushroom *Cyathus africanus*, and their neurotrophic and anti-neuroinflammatory activities

Jing Wei,<sup>1,3</sup> Wan-Hui Guo,<sup>1</sup> Chen-Yu Cao,<sup>1</sup> Rong-Wei Kou,<sup>1</sup> Yuan-Zhen Xu,<sup>1</sup> Marcin Górecki,<sup>2</sup> Lorenzo Di Bari,<sup>2</sup> Gennaro Pescitelli,<sup>\*,2</sup> & Jin-Ming Gao<sup>\*,1</sup>

<sup>1</sup> Shaanxi Key Laboratory of Natural Products & Chemical Biology, College of Chemistry & Pharmacy, Northwest A&F University, Yangling 712100, Shaanxi, People's Republic of China.

<sup>2</sup> Dipartimento di Chimica e Chimica Industriale, Università di Pisa, via Moruzzi 3, I-56124 Pisa, Italy.

<sup>3</sup> College of Biology Pharmacy & Food Engineering, Shangluo University, Shangluo 726000, Shaanxi, People's Republic of China.

## Content

|                                                                                                                         |    |
|-------------------------------------------------------------------------------------------------------------------------|----|
| <b>Figure S1.</b> <sup>1</sup> H NMR and <sup>13</sup> C spectra of compound <b>1</b> in CD <sub>3</sub> OD.....        | 3  |
| <b>Figure S2.</b> HSQC and <sup>1</sup> H- <sup>1</sup> H COSY spectra of compound <b>1</b> in CD <sub>3</sub> OD ..... | 4  |
| <b>Figure S3.</b> HMBC and NOESY spectra of compound <b>1</b> in CD <sub>3</sub> OD .....                               | 5  |
| <b>Figure S4.</b> HRESIMS spectrum of compound <b>1</b> . .....                                                         | 5  |
| <b>Figure S5.</b> IR and UV spectra of compound <b>1</b> . .....                                                        | 6  |
| <b>Figure S6.</b> <sup>1</sup> H NMR and <sup>13</sup> C spectra of compound <b>2</b> in CD <sub>3</sub> OD.....        | 7  |
| <b>Figure S7.</b> HSQC and <sup>1</sup> H- <sup>1</sup> H COSY spectra of compound <b>2</b> in CD <sub>3</sub> OD. .... | 8  |
| <b>Figure S8.</b> HMBC and NOESY spectra of compound <b>2</b> in CD <sub>3</sub> OD. ....                               | 9  |
| <b>Figure S9.</b> HRESIMS spectrum of compound <b>2</b> . .....                                                         | 10 |
| <b>Figure S10.</b> IR and UV spectra of compound <b>2</b> . .....                                                       | 10 |
| <b>Figure S11.</b> <sup>1</sup> H NMR and <sup>13</sup> C spectra of compound <b>3</b> in CD <sub>3</sub> OD.....       | 11 |
| <b>Figure S12.</b> HSQC and <sup>1</sup> H- <sup>1</sup> H COSY spectra of compound <b>3</b> in CD <sub>3</sub> OD..... | 12 |
| <b>Figure S13.</b> HMBC and NOESY spectra of compound <b>3</b> in CD <sub>3</sub> OD.....                               | 13 |
| <b>Figure S14.</b> HRESIMS spectrum of compound <b>3</b> . .....                                                        | 14 |
| <b>Figure S15.</b> IR and UV spectra of compound <b>3</b> . .....                                                       | 15 |

|                                                                                                                             |    |
|-----------------------------------------------------------------------------------------------------------------------------|----|
| <b>Figure S16.</b> $^1\text{H}$ NMR and $^{13}\text{C}$ spectra of compound <b>4</b> in $\text{CD}_3\text{OD}$ .....        | 16 |
| <b>Figure S17.</b> HSQC and $^1\text{H}$ - $^1\text{H}$ COSY spectra of compound <b>4</b> in $\text{CD}_3\text{OD}$ .....   | 17 |
| <b>Figure S18.</b> HMBC and NOESY spectra of compound <b>4</b> in $\text{CD}_3\text{OD}$ .....                              | 18 |
| <b>Figure S19.</b> HRESIMS spectrum of compound <b>4</b> .....                                                              | 19 |
| <b>Figure S20.</b> IR and UV spectra of compound <b>4</b> .....                                                             | 19 |
| <b>Figure S21.</b> $^1\text{H}$ NMR and $^{13}\text{C}$ spectra of compound <b>5</b> in $\text{CD}_3\text{OD}$ .....        | 20 |
| <b>Figure S22.</b> HSQC and $^1\text{H}$ - $^1\text{H}$ COSY spectra of compound <b>5</b> in $\text{CD}_3\text{OD}$ .....   | 21 |
| <b>Figure S23.</b> HMBC and NOESY spectra of compound <b>5</b> in $\text{CD}_3\text{OD}$ .....                              | 22 |
| <b>Figure S24.</b> HRESIMS spectrum of compound <b>5</b> .....                                                              | 23 |
| <b>Figure S25.</b> IR and UV spectra of compound <b>5</b> .....                                                             | 24 |
| <b>Figure S26.</b> $^1\text{H}$ NMR and $^{13}\text{C}$ spectra of compound <b>6</b> in $\text{CD}_3\text{OD}$ .....        | 25 |
| <b>Figure S27.</b> HSQC and $^1\text{H}$ - $^1\text{H}$ COSY spectra of compound <b>6</b> in $\text{CD}_3\text{OD}$ .....   | 26 |
| <b>Figure S28.</b> HMBC and NOESY spectra of compound <b>6</b> in $\text{CD}_3\text{OD}$ .....                              | 27 |
| <b>Figure S29.</b> HRESIMS spectrum of compound <b>6</b> .....                                                              | 28 |
| <b>Figure S30.</b> IR and UV spectra of compound <b>6</b> .....                                                             | 28 |
| <b>Figure S31.</b> $^1\text{H}$ NMR and $^{13}\text{C}$ spectra of compound <b>7</b> in $\text{CD}_3\text{OD}$ .....        | 29 |
| <b>Figure S32.</b> HSQC and $^1\text{H}$ - $^1\text{H}$ COSY spectra of compound <b>7</b> in $\text{CD}_3\text{OD}$ .....   | 30 |
| <b>Figure S33.</b> HMBC and NOESY spectra of compound <b>7</b> in $\text{CD}_3\text{OD}$ .....                              | 31 |
| <b>Figure S34.</b> HRESIMS spectrum of compound <b>7</b> .....                                                              | 32 |
| <b>Figure S35.</b> IR and UV spectra of compound <b>7</b> .....                                                             | 33 |
| <b>Figure S36.</b> $^1\text{H}$ NMR and $^{13}\text{C}$ spectra of compound <b>8</b> in $\text{CD}_3\text{OD}$ .....        | 34 |
| <b>Figure S37.</b> HSQC and $^1\text{H}$ - $^1\text{H}$ COSY spectra of compound <b>8</b> in $\text{CD}_3\text{OD}$ .....   | 35 |
| <b>Figure S38.</b> HMBC and NOESY spectra of compound <b>8</b> in $\text{CD}_3\text{OD}$ .....                              | 36 |
| <b>Figure S39.</b> HRESIMS spectrum of compound <b>8</b> .....                                                              | 37 |
| <b>Figure S40.</b> IR and UV spectra of compound <b>8</b> .....                                                             | 37 |
| <b>Figure S41.</b> $^1\text{H}$ NMR and $^{13}\text{C}$ spectra of compound <b>9</b> in $\text{CD}_3\text{OD}$ .....        | 38 |
| <b>Figure S42.</b> HSQC and $^1\text{H}$ - $^1\text{H}$ COSY spectra of compound <b>9</b> in $\text{CD}_3\text{OD}$ .....   | 39 |
| <b>Figure S43.</b> HMBC and NOESY spectra of compound <b>9</b> in $\text{CD}_3\text{OD}$ .....                              | 40 |
| <b>Figure S44.</b> HRESIMS spectrum of compound <b>9</b> .....                                                              | 42 |
| <b>Figure S45.</b> IR and UV spectra of compound <b>9</b> .....                                                             | 42 |
| <b>Figure S46.</b> $^1\text{H}$ NMR and $^{13}\text{C}$ spectra of compound <b>10</b> in $\text{CD}_3\text{OD}$ .....       | 43 |
| <b>Figure S47.</b> ESIMS spectrum of compound <b>10</b> .....                                                               | 44 |
| <b>Figure S48.</b> $^1\text{H}$ NMR and $^{13}\text{C}$ spectra of compound <b>11</b> in $\text{CD}_3\text{OD}$ .....       | 44 |
| <b>Figure S49.</b> ESIMS spectrum of compound <b>11</b> .....                                                               | 45 |
| <b>Figure S50.</b> $^1\text{H}$ NMR and $^{13}\text{C}$ spectra of compound <b>6a</b> in $\text{CD}_3\text{CN}$ .....       | 46 |
| <b>Figure S51.</b> HSQC and $^1\text{H}$ - $^1\text{H}$ TOCSY spectra of compound <b>6a</b> in $\text{CD}_3\text{CN}$ ..... | 47 |
| <b>Figure S52.</b> HMBC and ROESY spectra of compound <b>6a</b> in $\text{CD}_3\text{CN}$ .....                             | 48 |
| <b>Figure S53.</b> Cytotoxicity of the isolated compounds <b>1-10</b> to PC-12 cells .....                                  | 49 |
| <b>Figure S54.</b> Effect of compound <b>1</b> on the NGF-promoted neurite outgrowth in PC-12 cells .....                   | 49 |
| <b>Table S1.</b> $^1\text{H}$ and $^{13}\text{C}$ data of <b>9-11</b> , and cyathin I in $\text{CD}_3\text{OD}$ .....       | 50 |
| <b>Table S2.</b> Logarithms of Free Binding Energy of the NO Inhibitor.....                                                 | 51 |

**Figure S1.**  $^1\text{H}$  NMR and  $^{13}\text{C}$  spectra of compound **1** in  $\text{CD}_3\text{OD}$ .

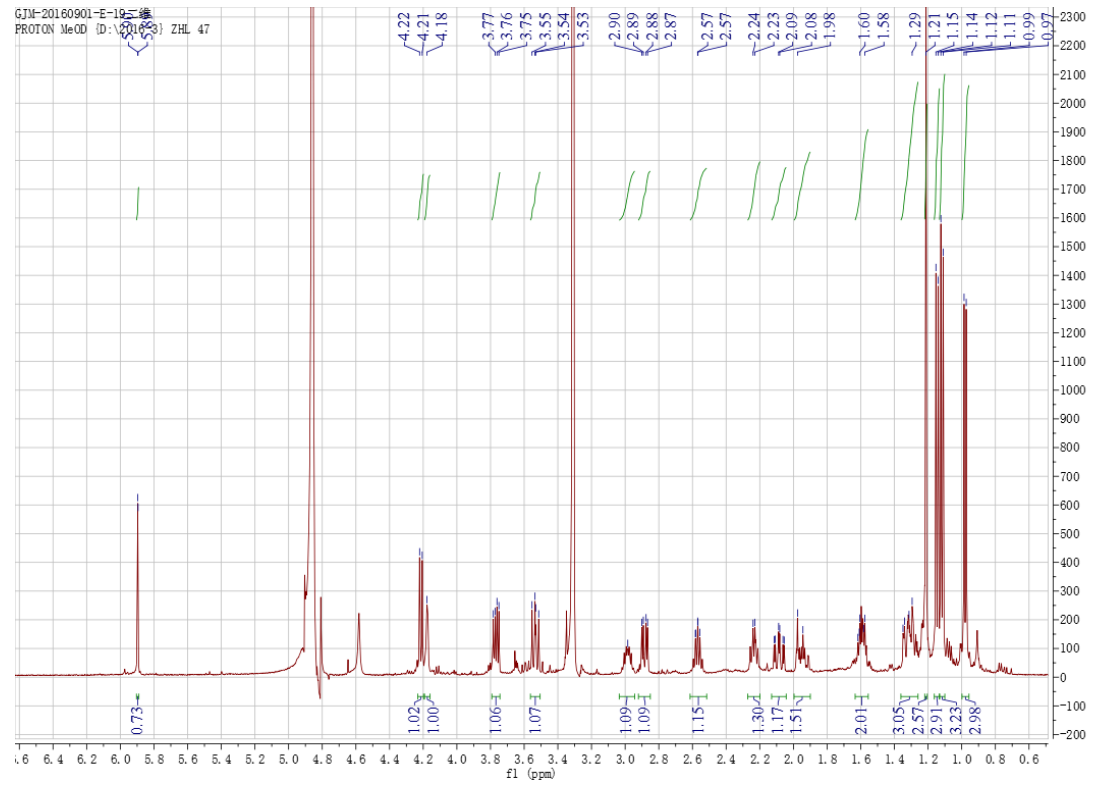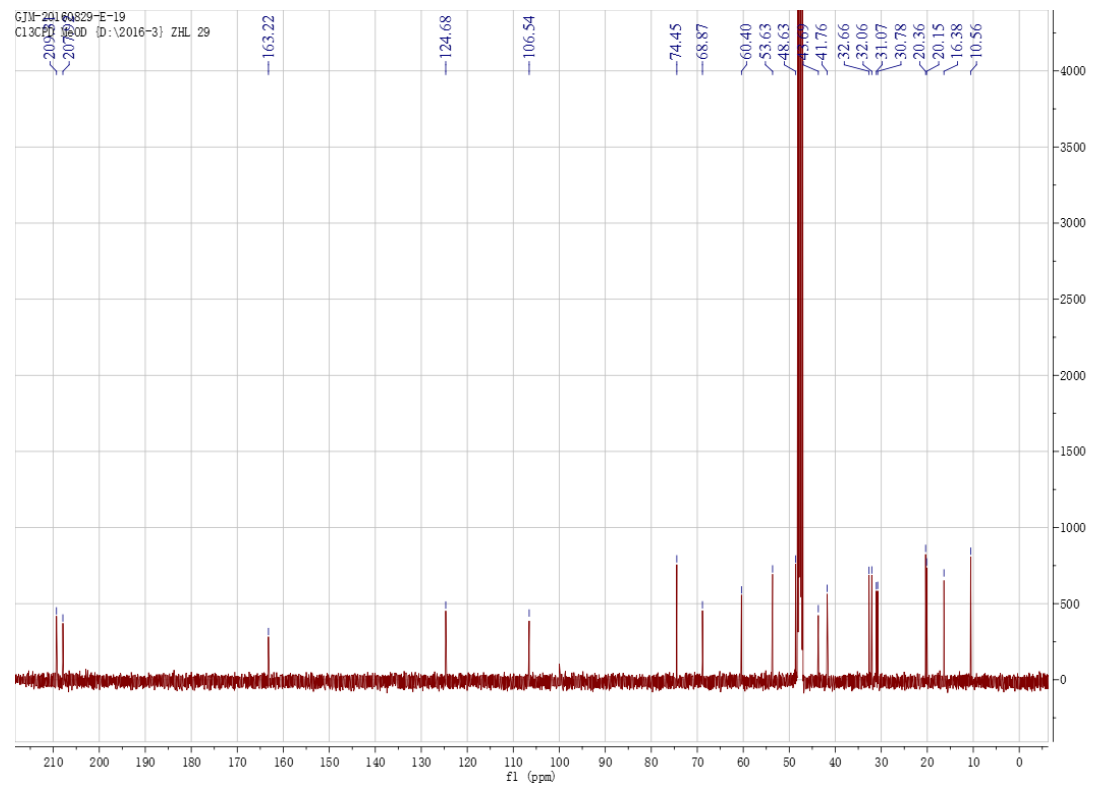

**Figure S2.** HSQC and  $^1\text{H}$ - $^1\text{H}$  COSY spectra of compound **1** in  $\text{CD}_3\text{OD}$

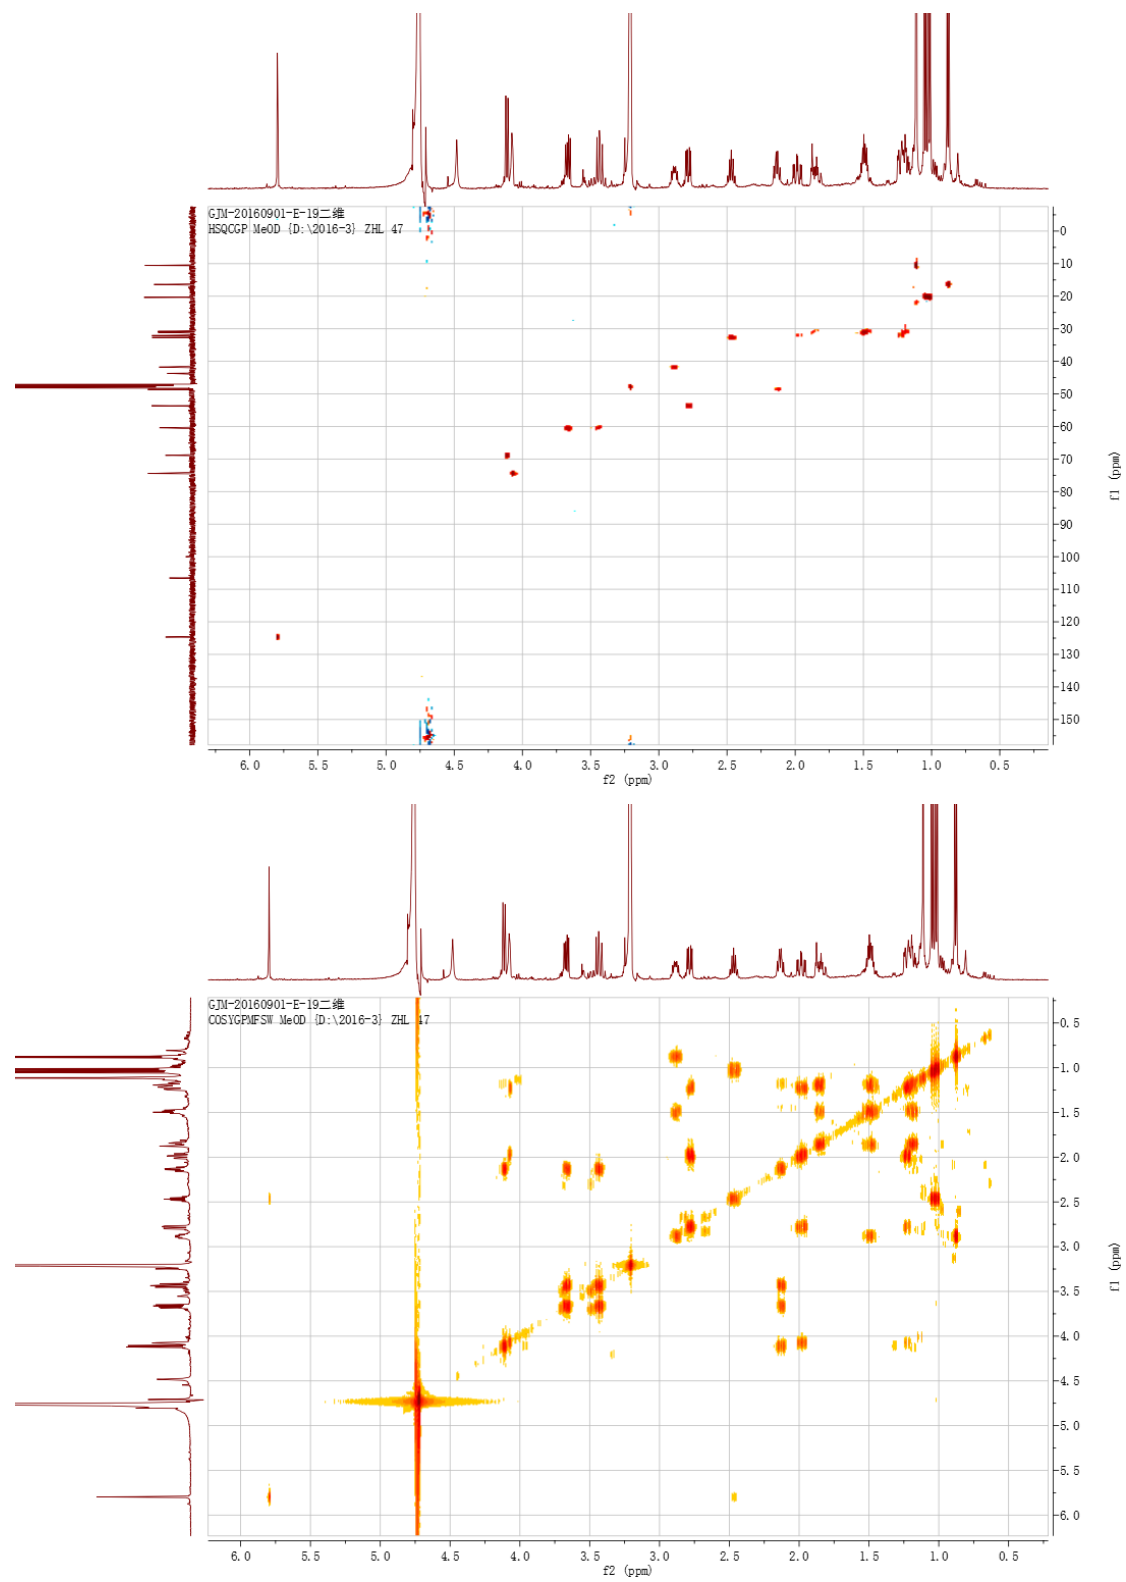

**Figure S3.** HMBC and NOESY spectra of compound **1** in CD<sub>3</sub>OD

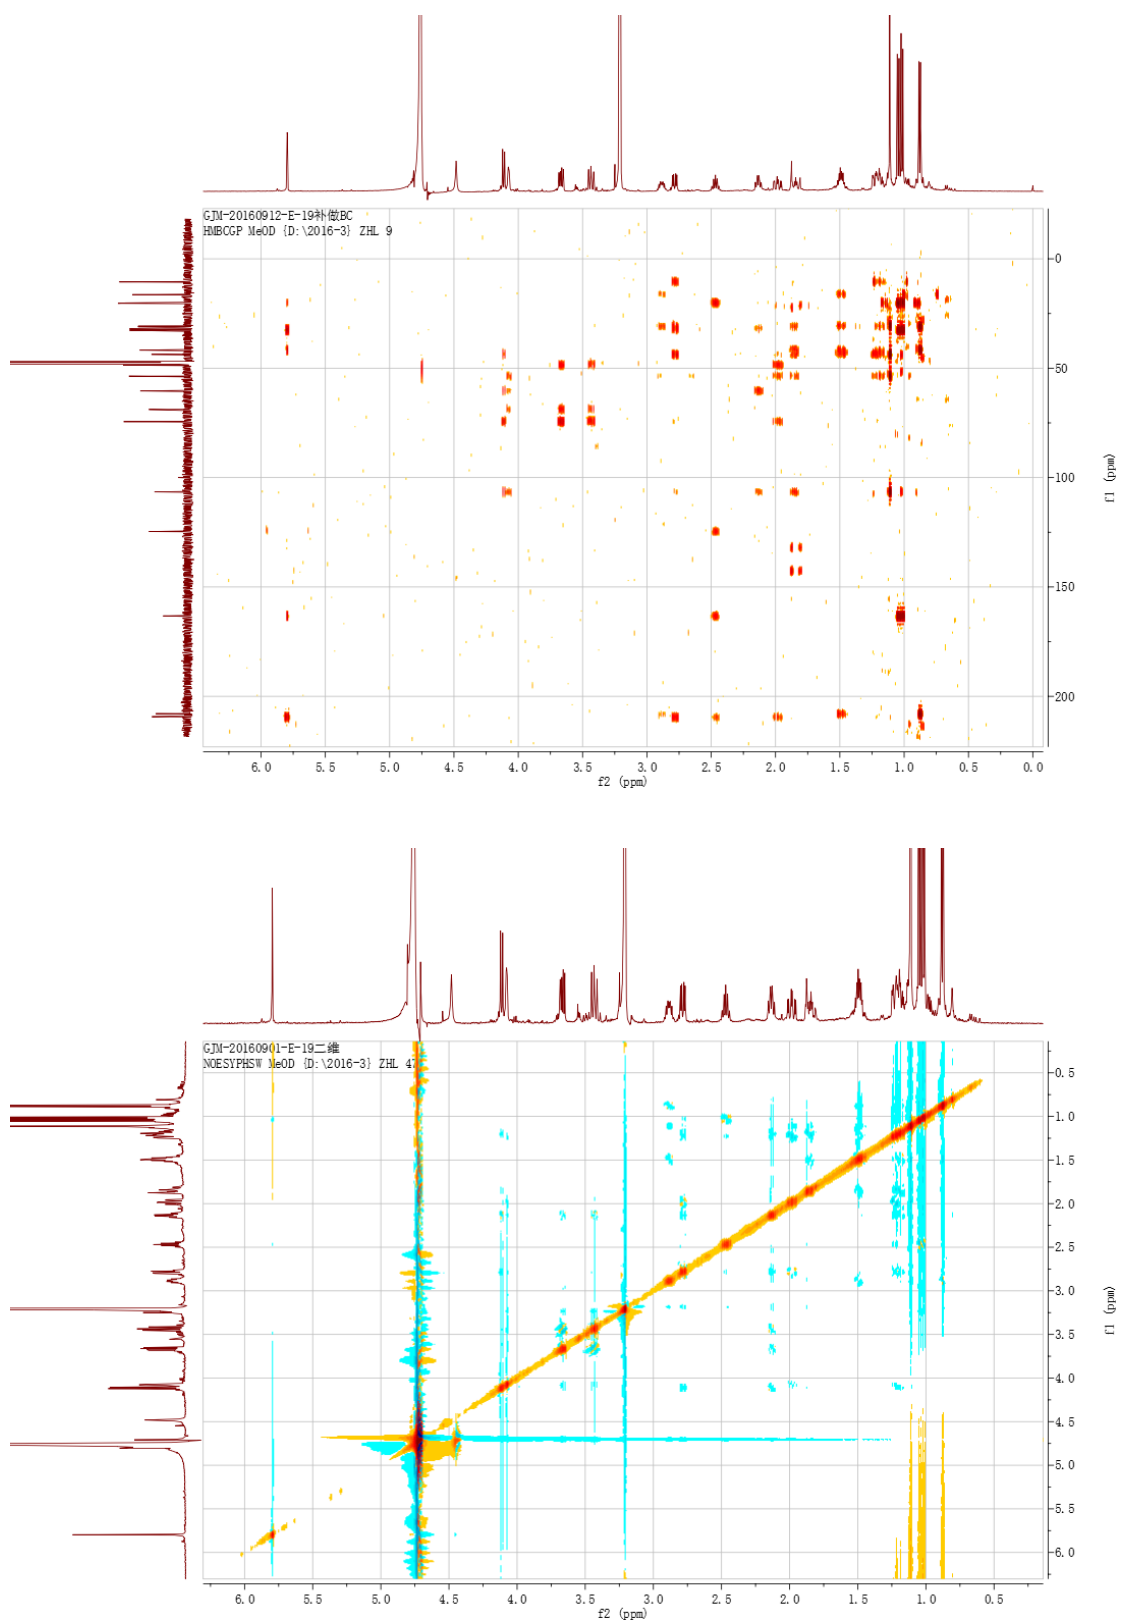

**Figure S4.** HRESIMS spectrum of compound **1**.

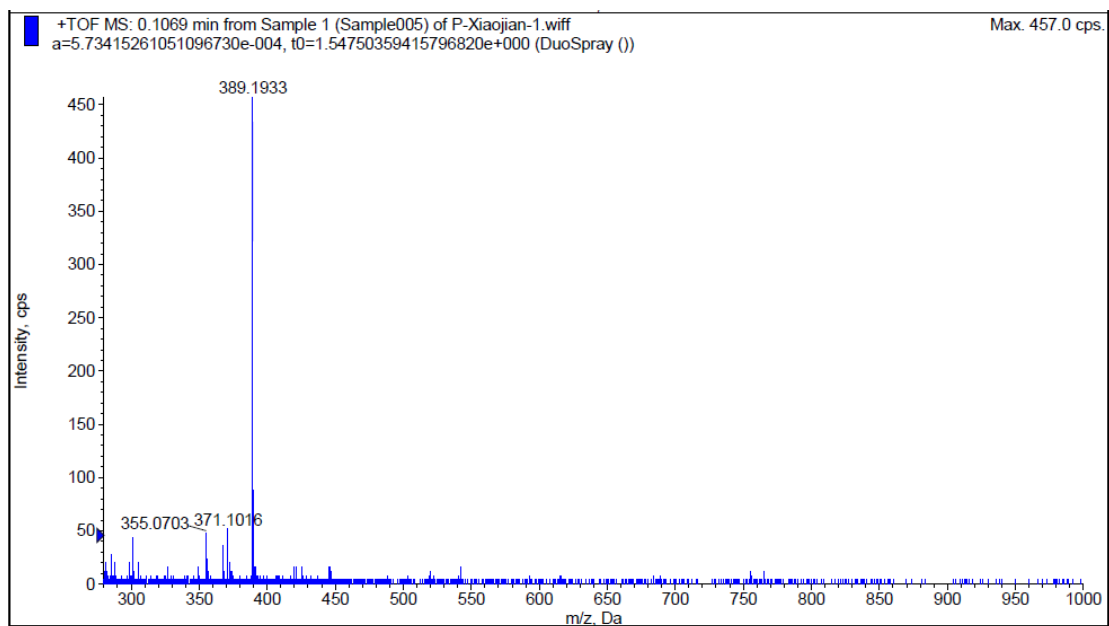

Figure S5. IR and UV spectra of compound **1**.

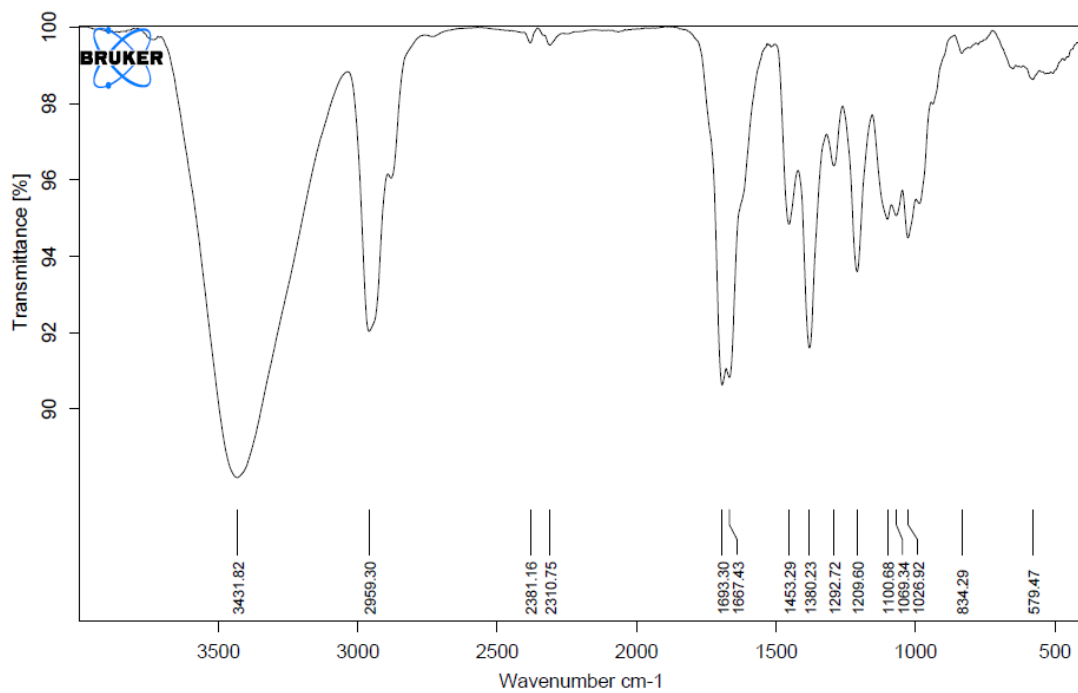

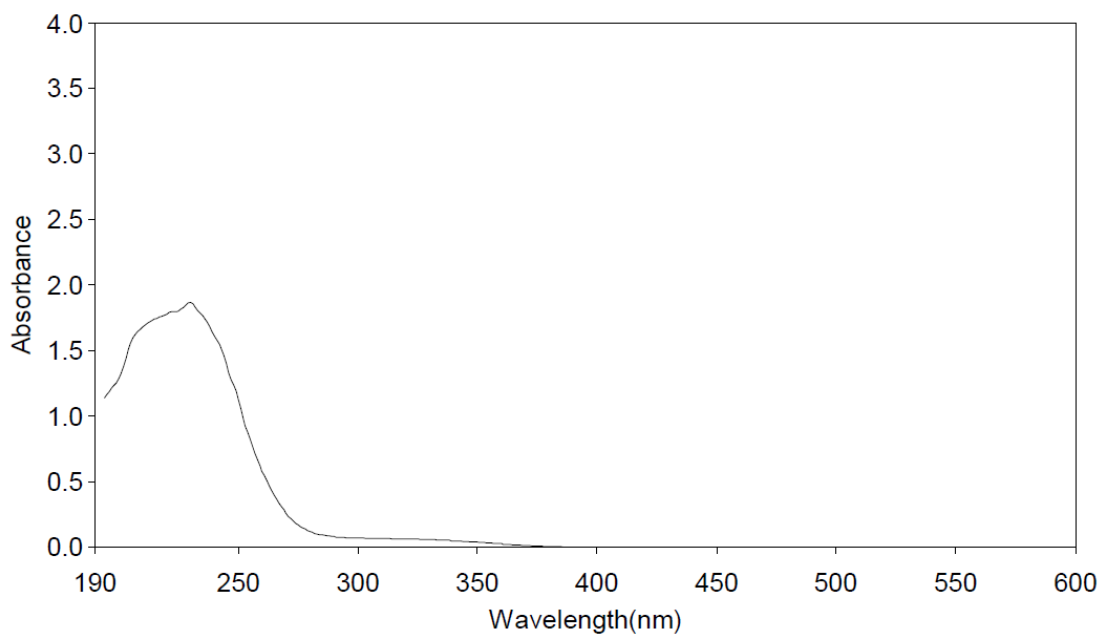

**Figure S6.**  $^1\text{H}$  NMR and  $^{13}\text{C}$  spectra of compound **2** in  $\text{CD}_3\text{OD}$ .

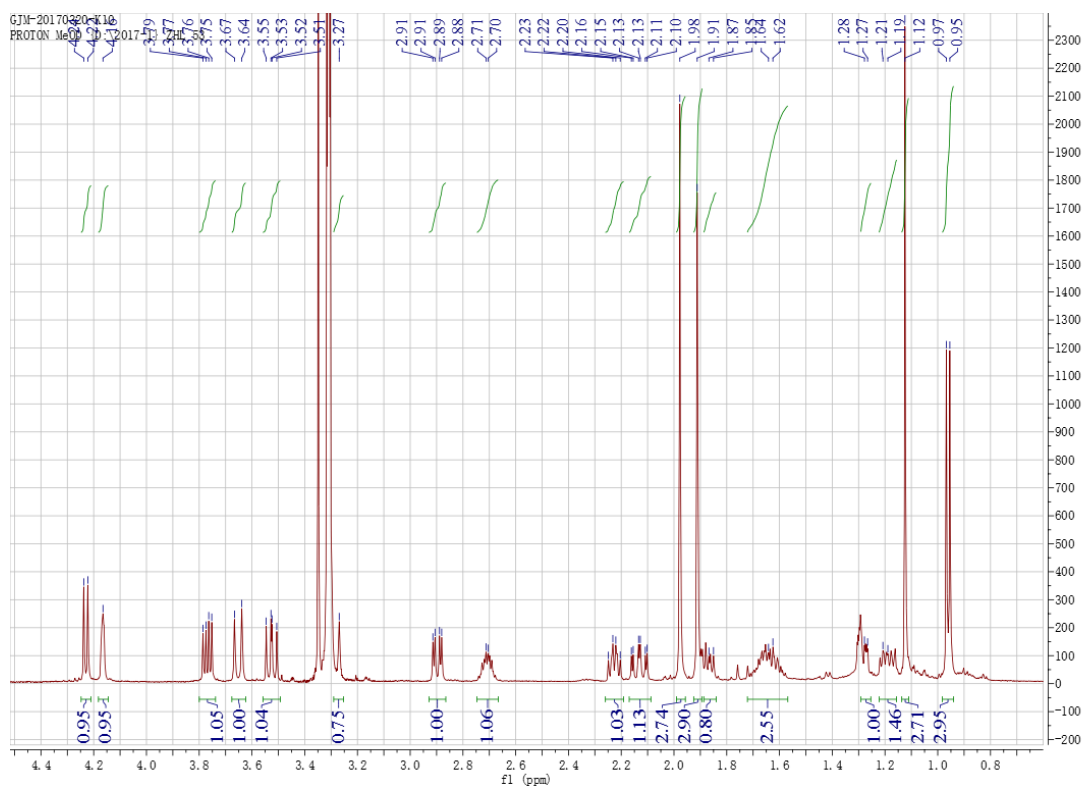

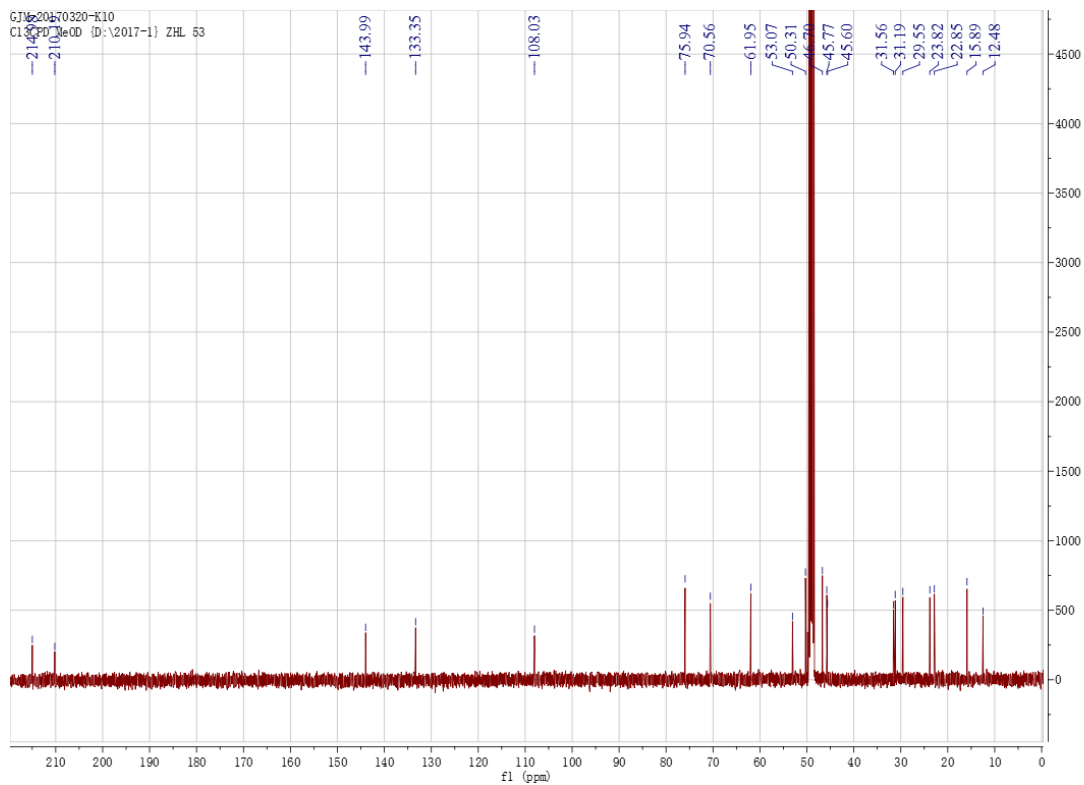

**Figure S7.** HSQC and  $^1\text{H}$ - $^1\text{H}$  COSY spectra of compound **2** in  $\text{CD}_3\text{OD}$ .

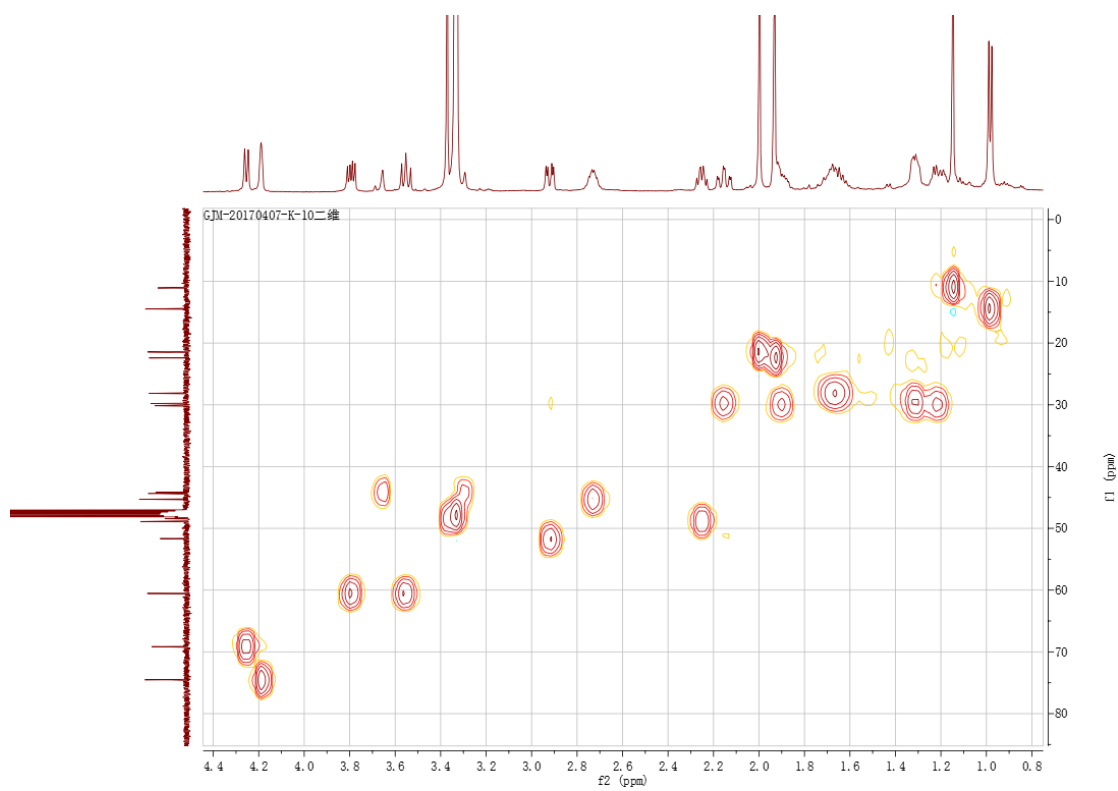



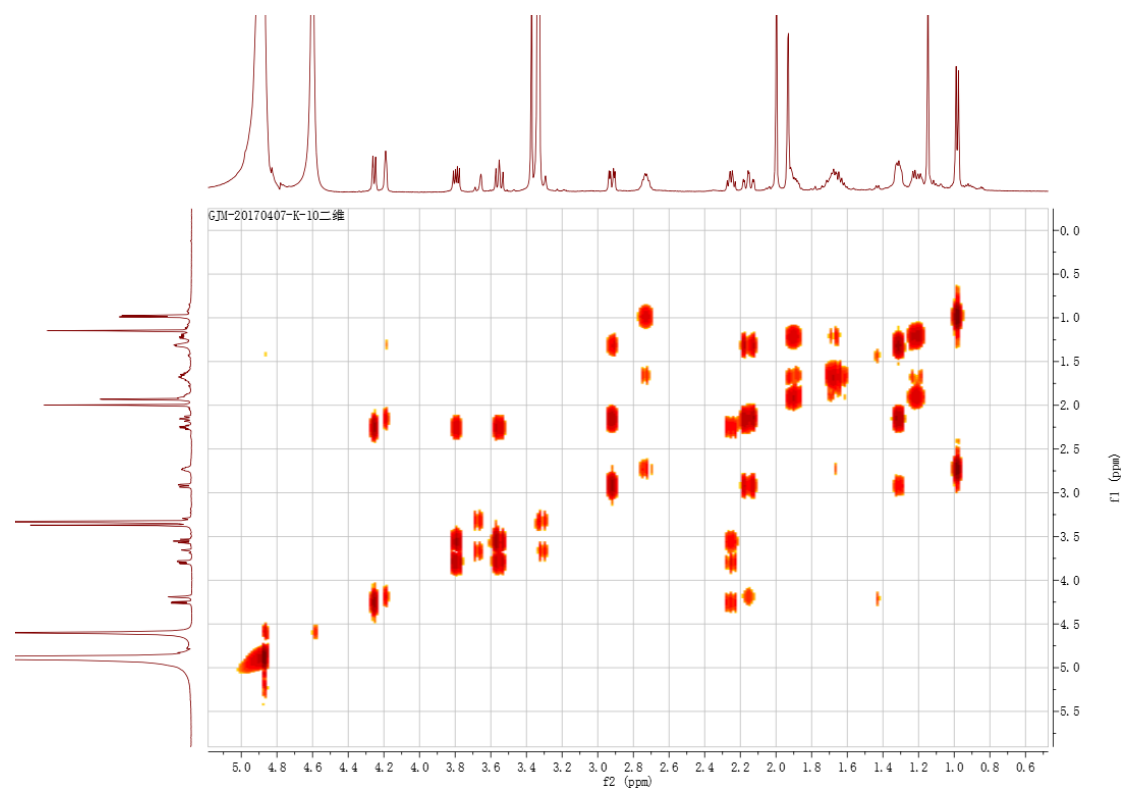

**Figure S8.** HMBC and NOESY spectra of compound **2** in CD<sub>3</sub>OD.

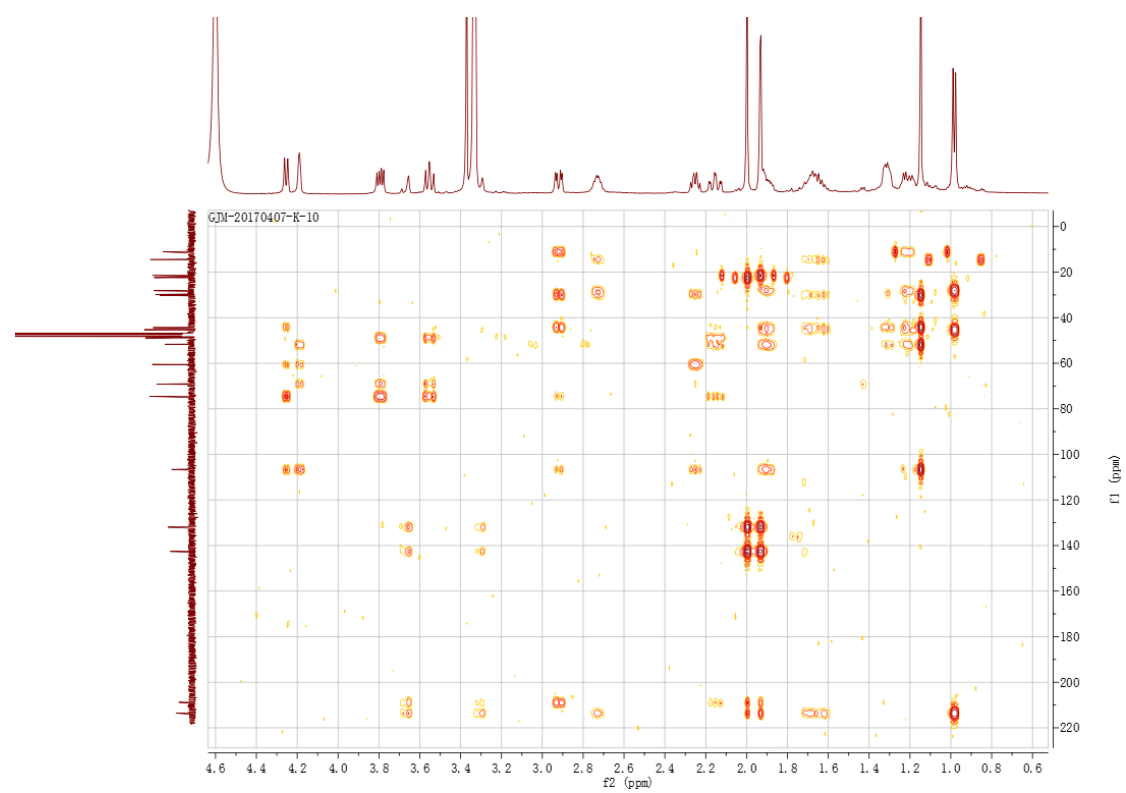

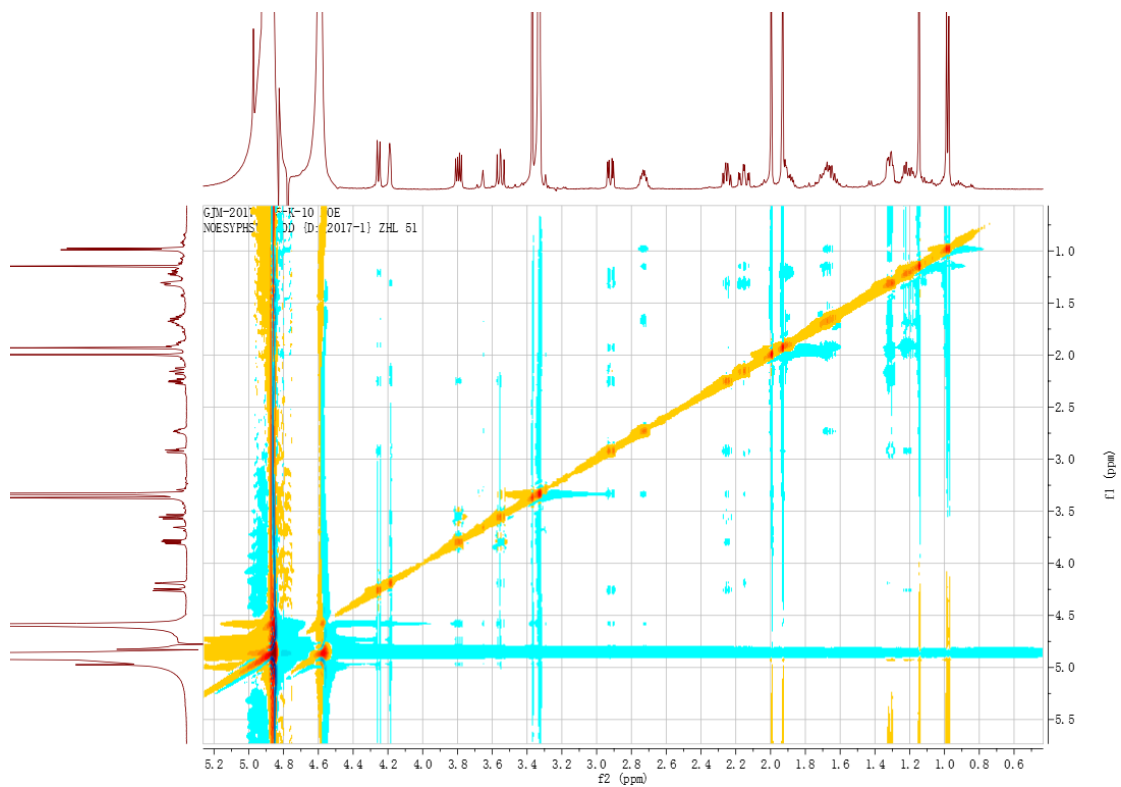

**Figure S9.** HRESIMS spectrum of compound **2**.

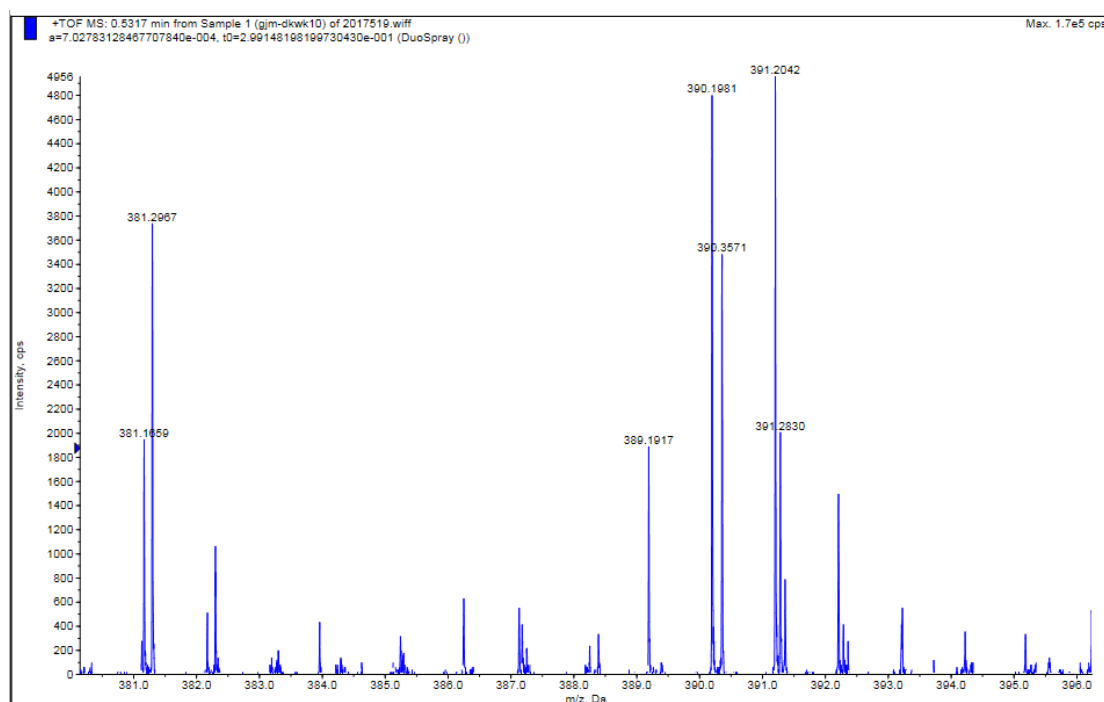

**Figure S10.** IR and UV spectra of compound **2**.

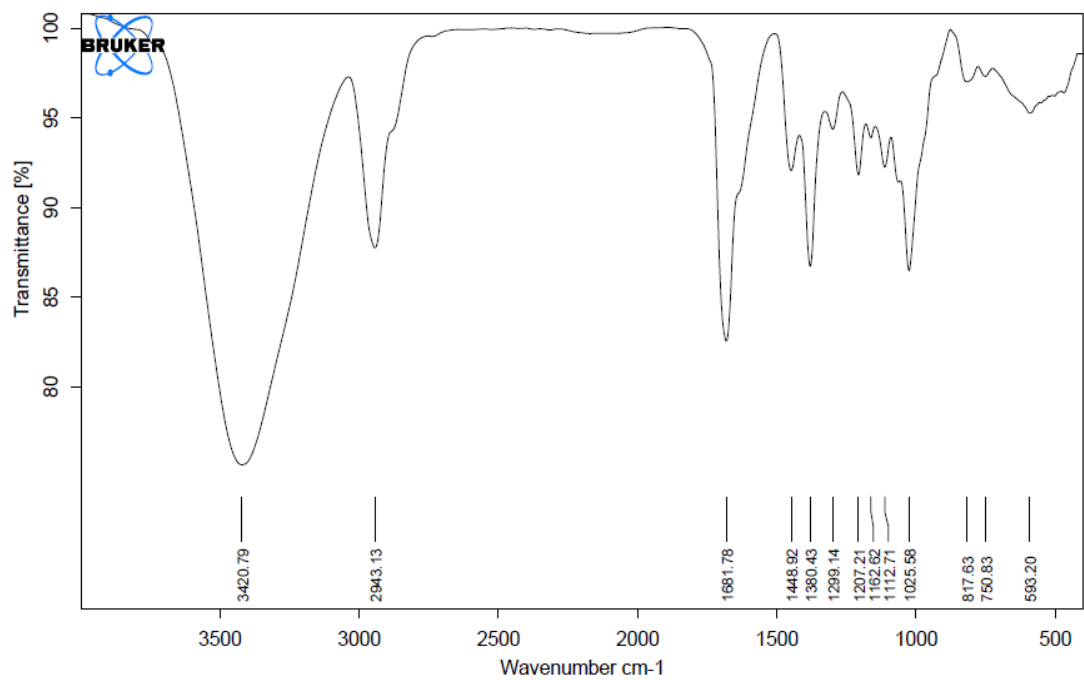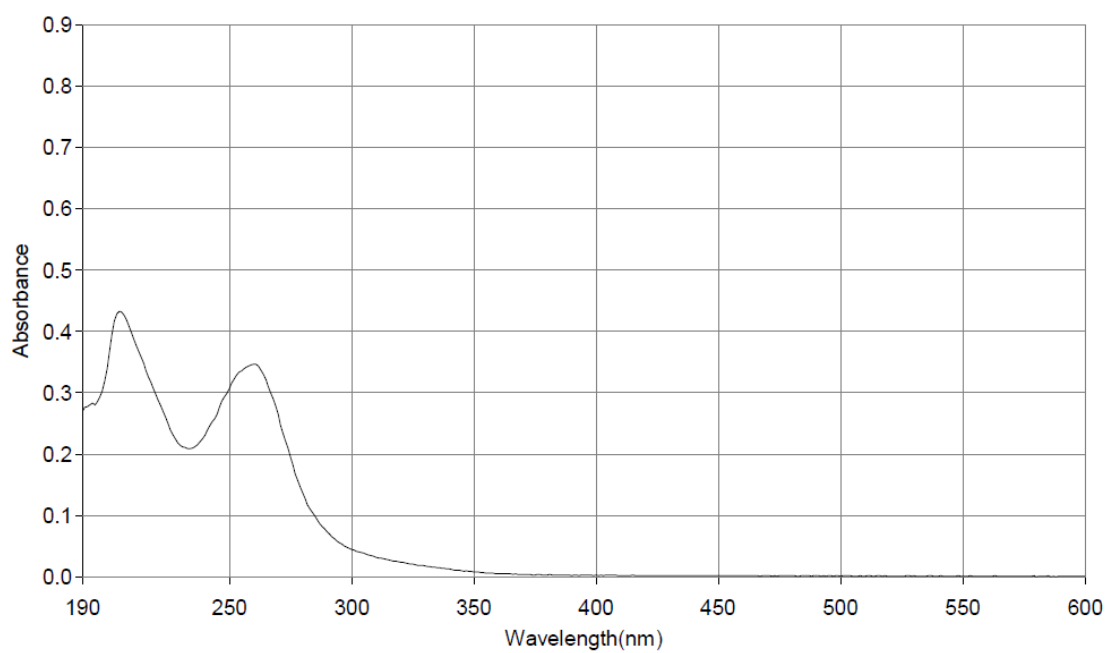

**Figure S11.**  $^1\text{H}$  NMR and  $^{13}\text{C}$  spectra of compound **3** in  $\text{CD}_3\text{OD}$ .

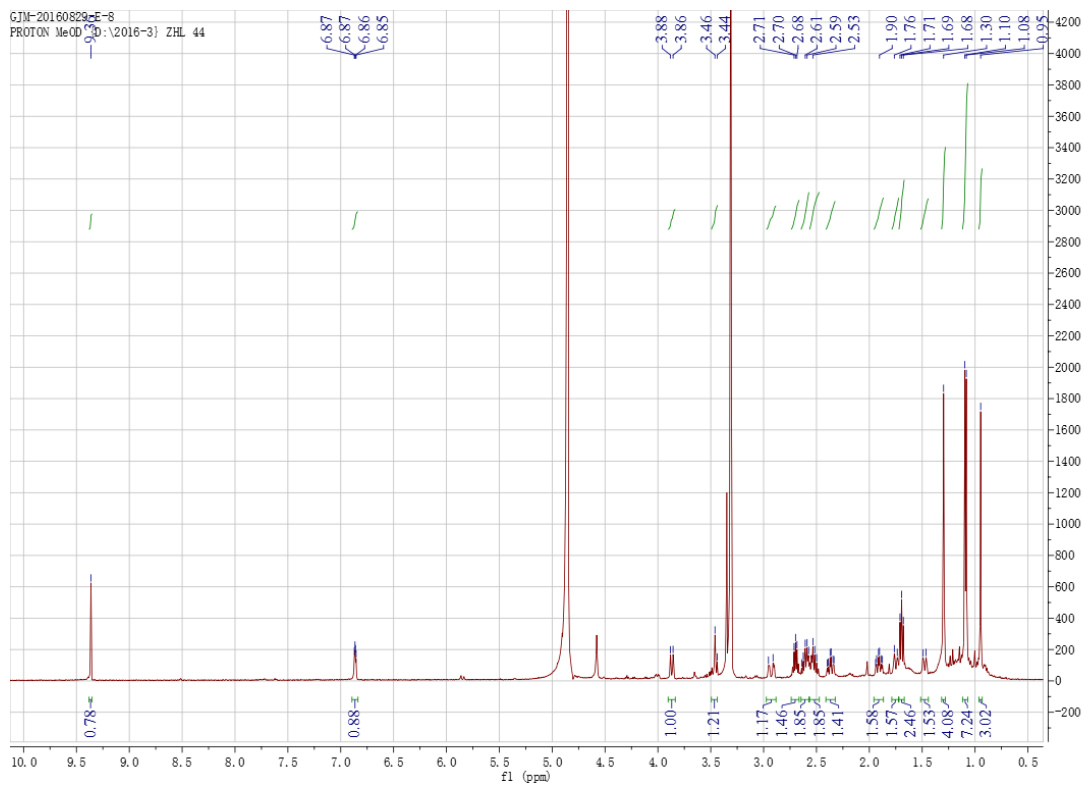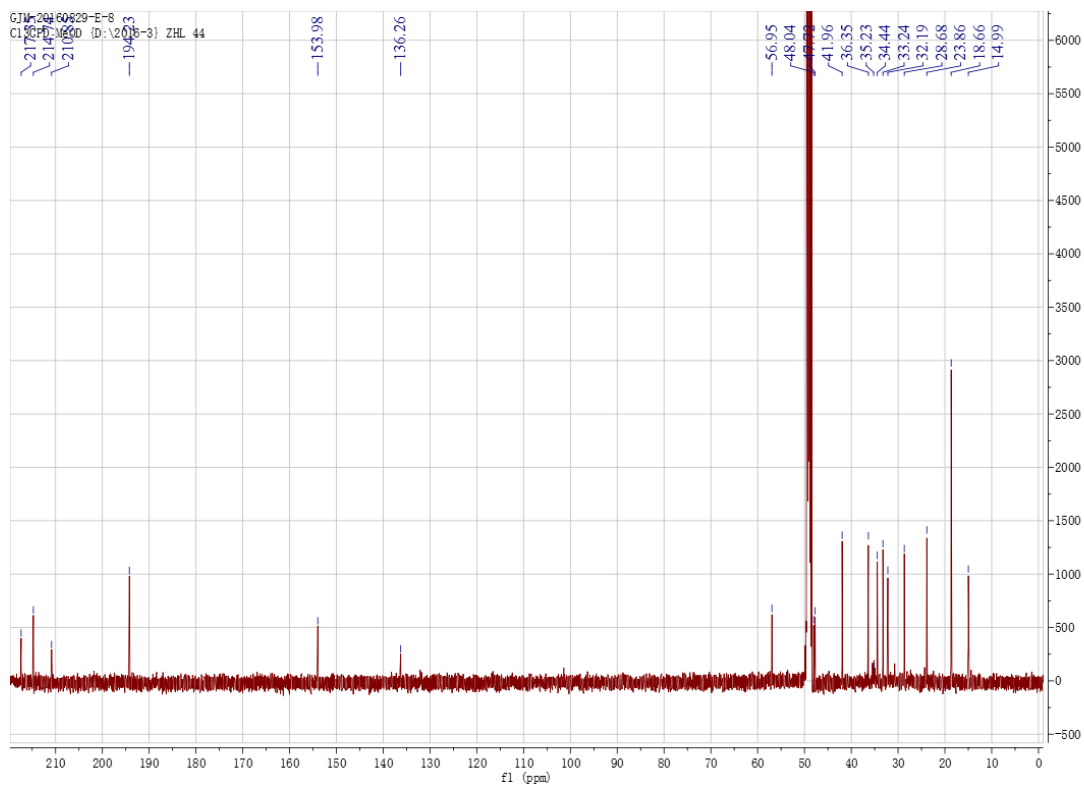

**Figure S12.** HSQC and  $^1\text{H}$ - $^1\text{H}$  COSY spectra of compound **3** in  $\text{CD}_3\text{OD}$ .

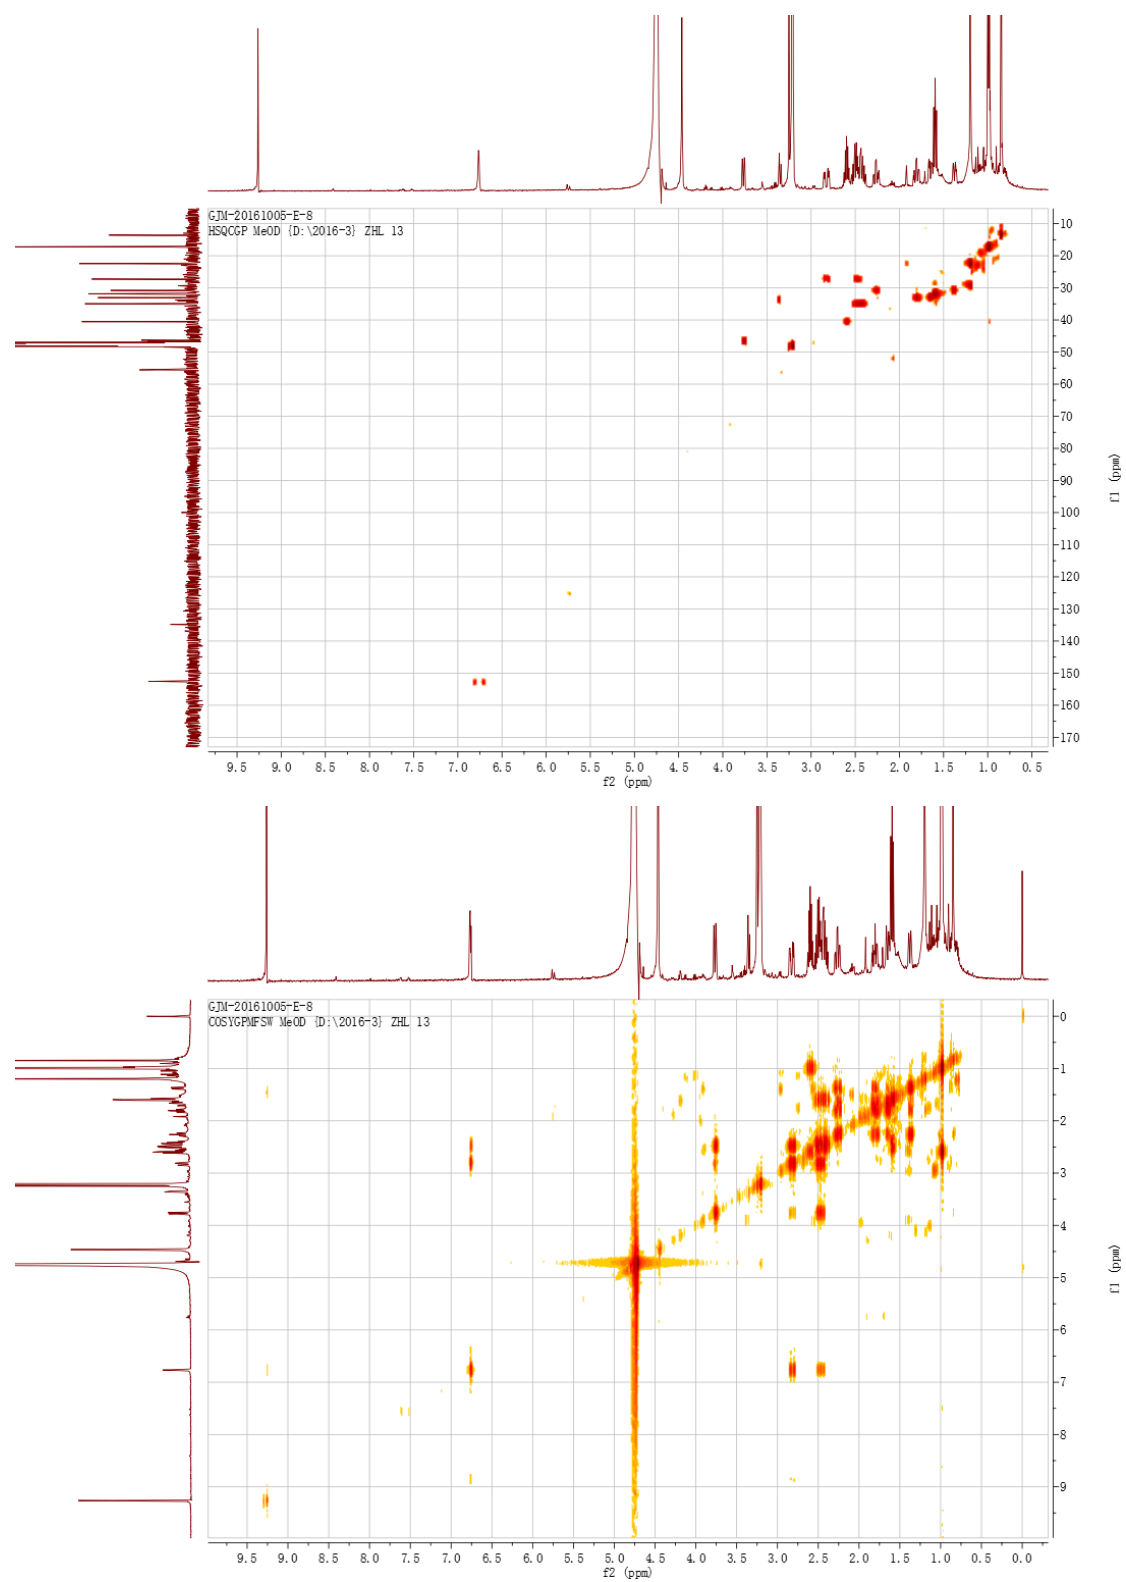

**Figure S13.** HMBC and NOESY spectra of compound **3** in CD<sub>3</sub>OD.

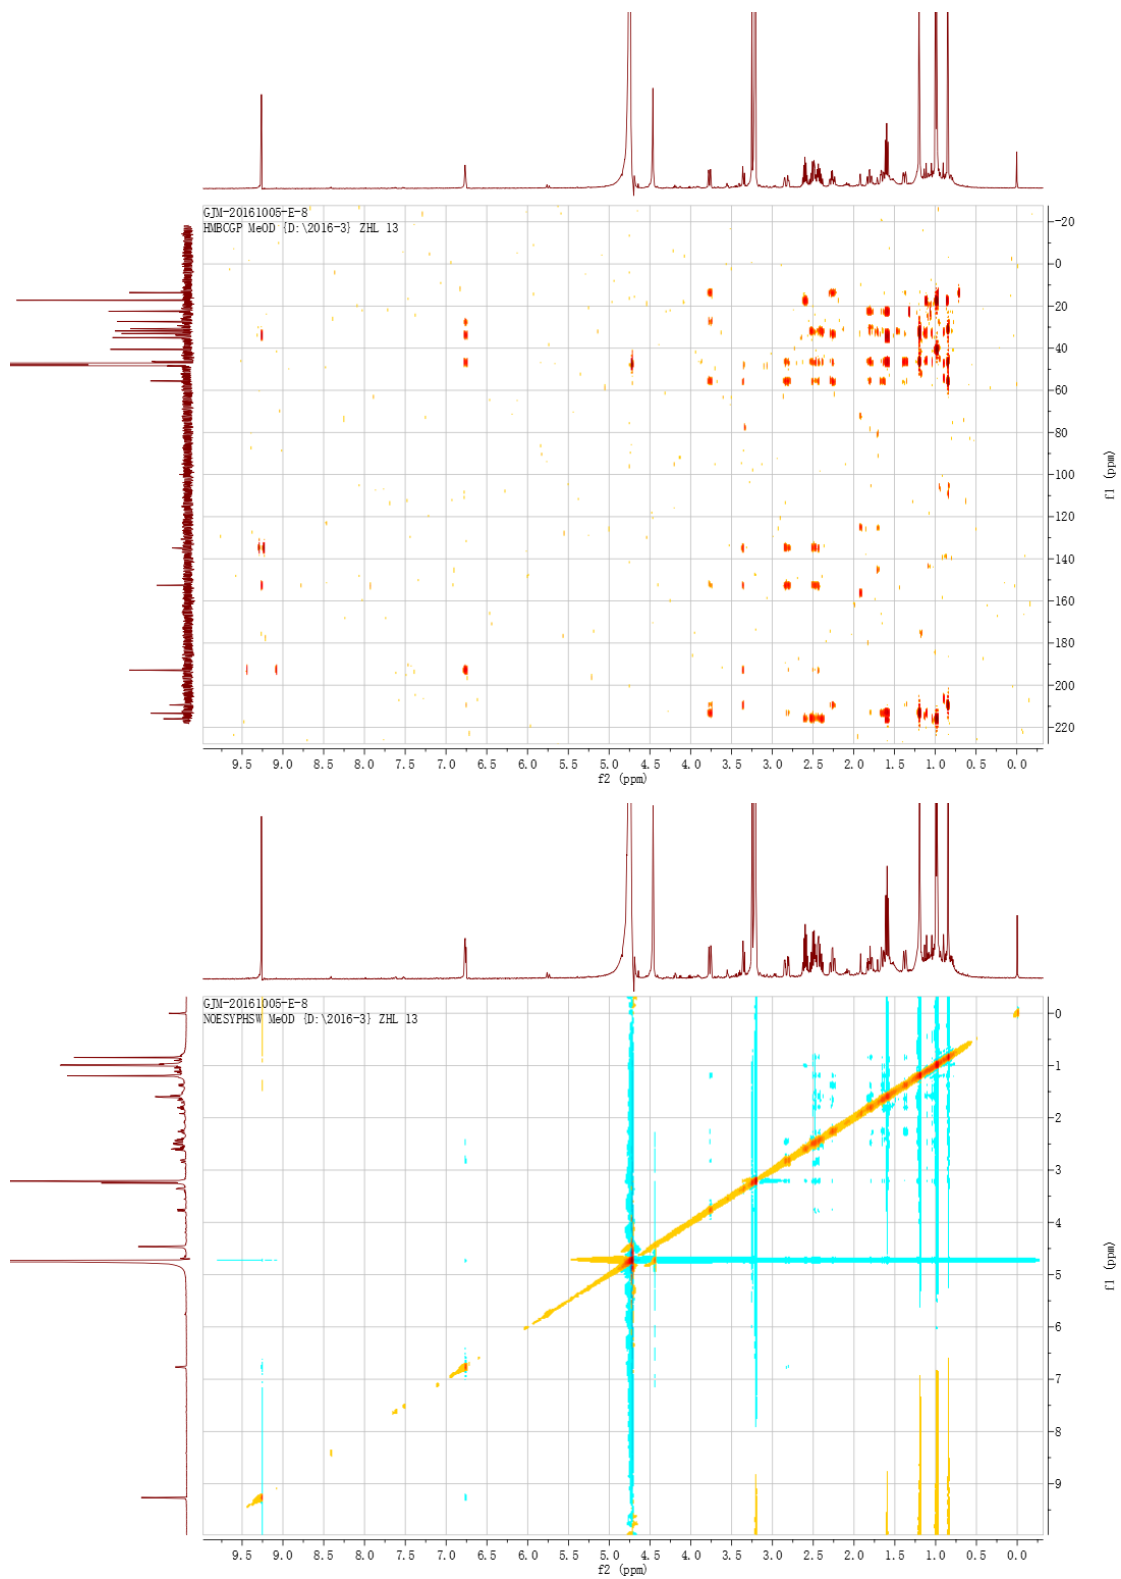

**Figure S14.** HRESIMS spectrum of compound **3**.

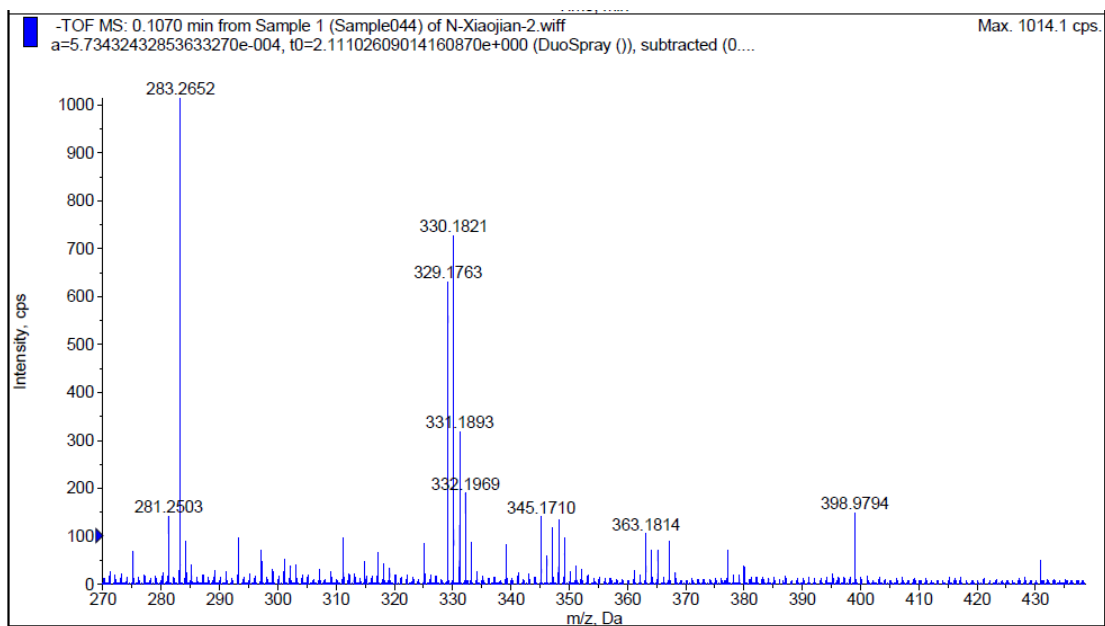

Figure S15. IR and UV spectra of compound 3.

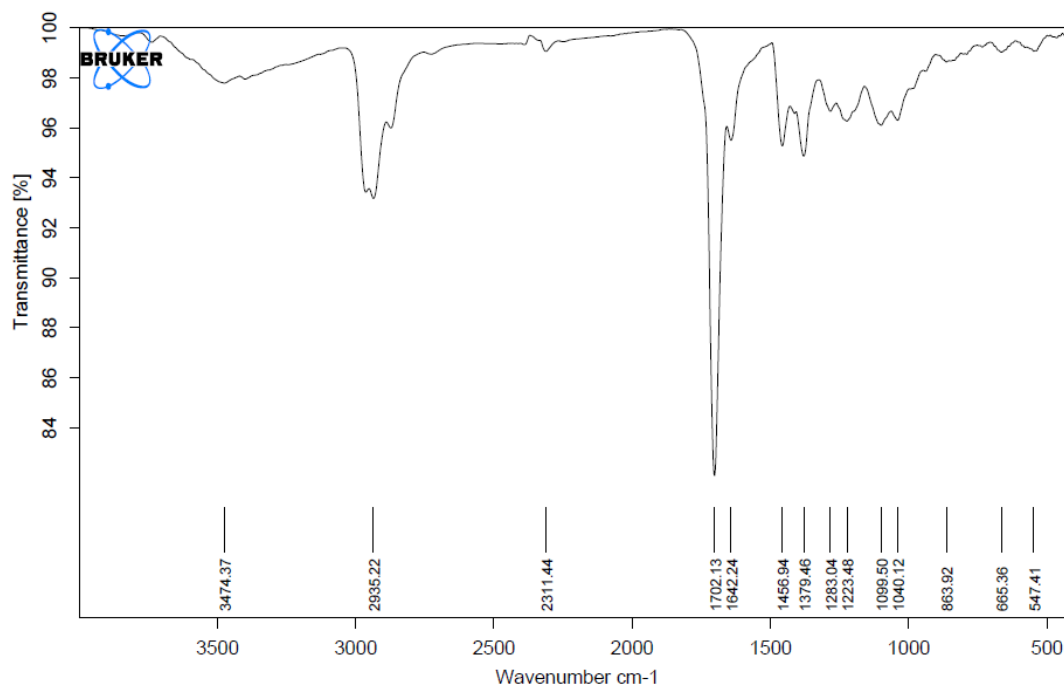

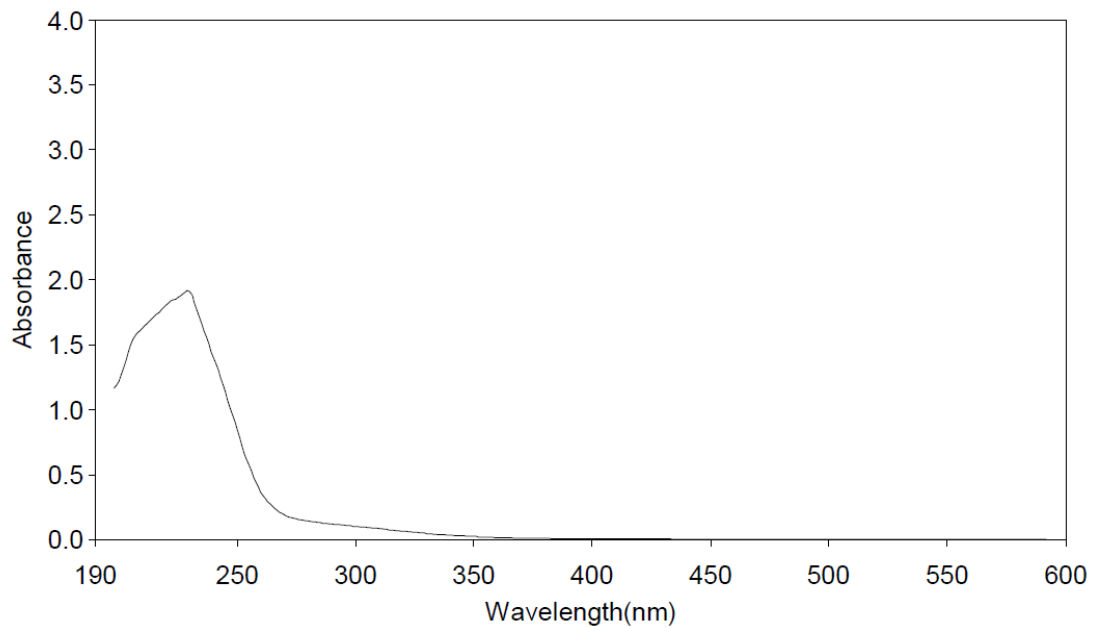

**Figure S16.** <sup>1</sup>H NMR and <sup>13</sup>C spectra of compound 4 in CD<sub>3</sub>OD.

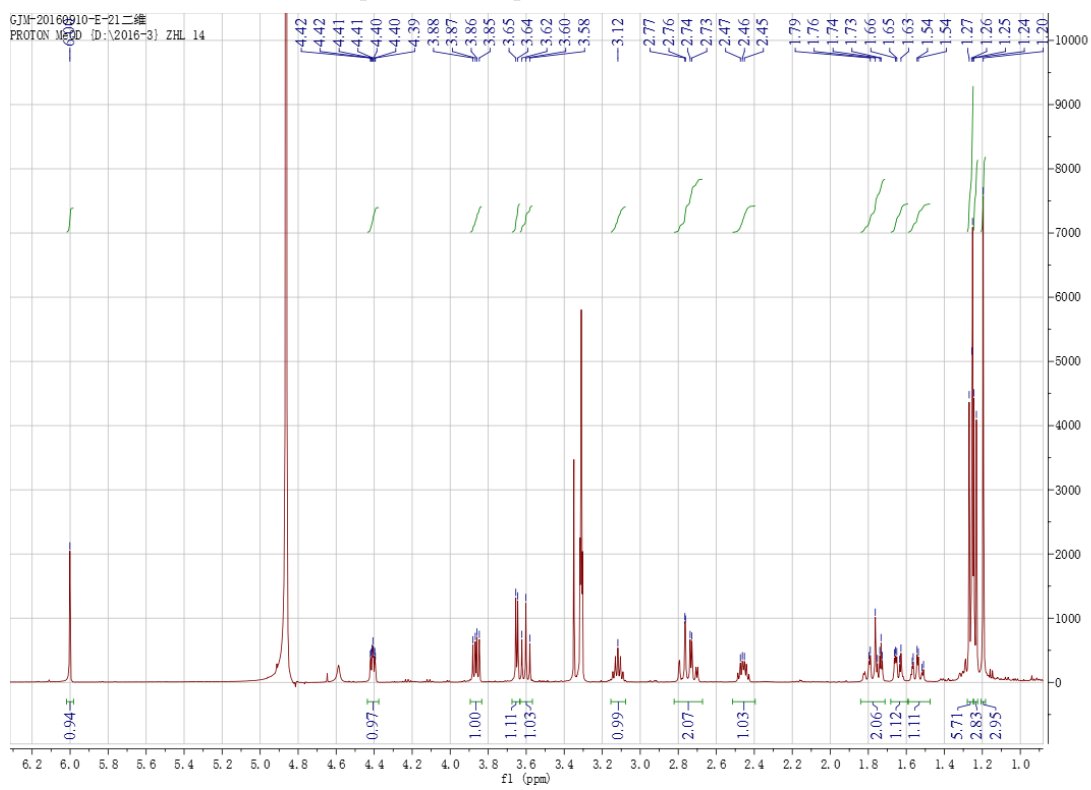



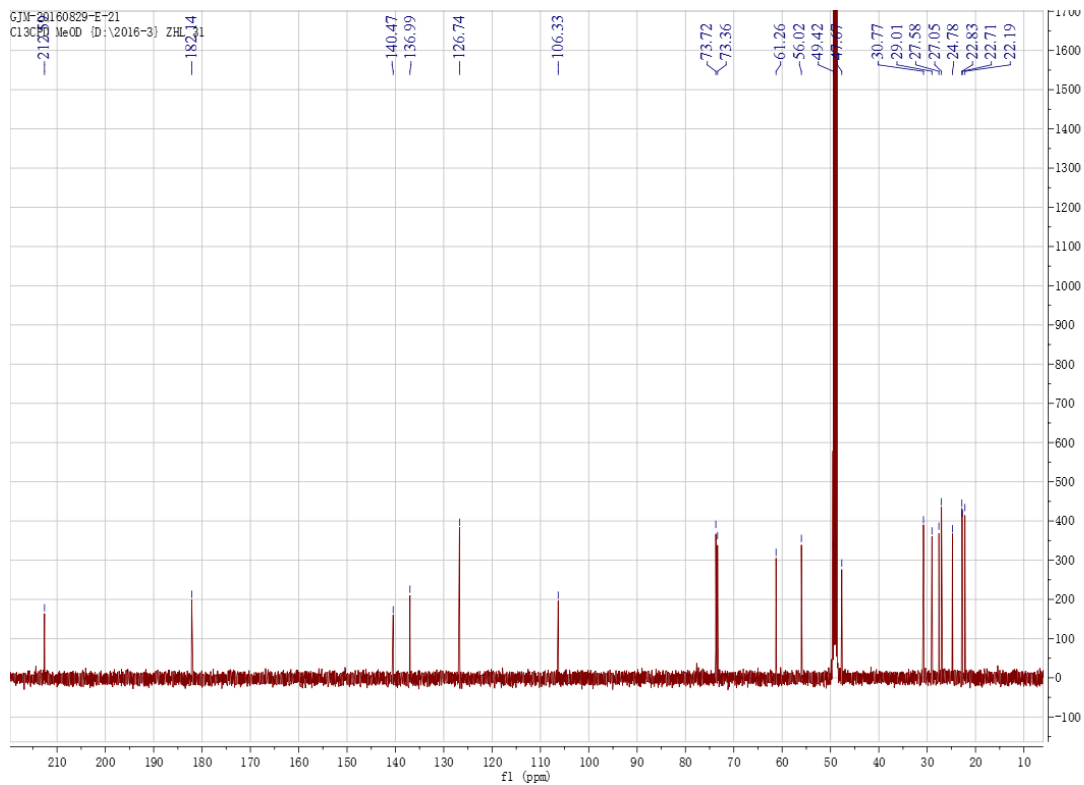

**Figure S17.** HSQC and  $^1\text{H}$ - $^1\text{H}$  COSY spectra of compound **4** in  $\text{CD}_3\text{OD}$ .

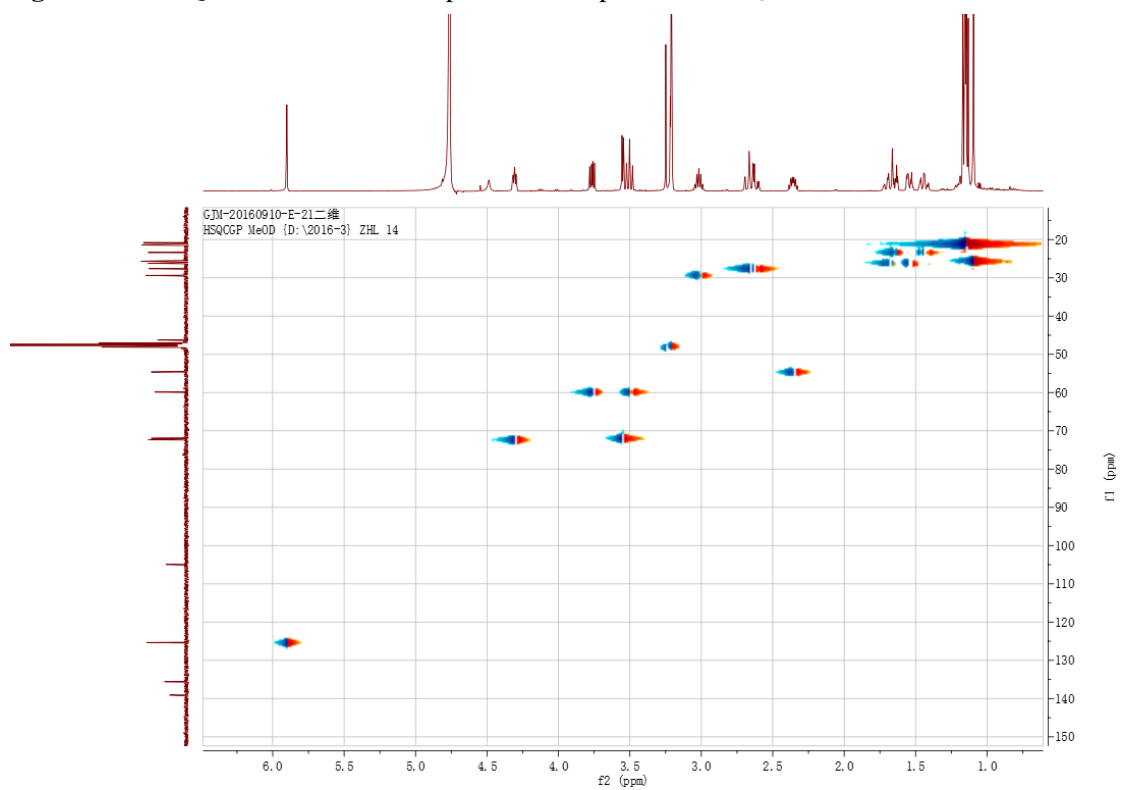

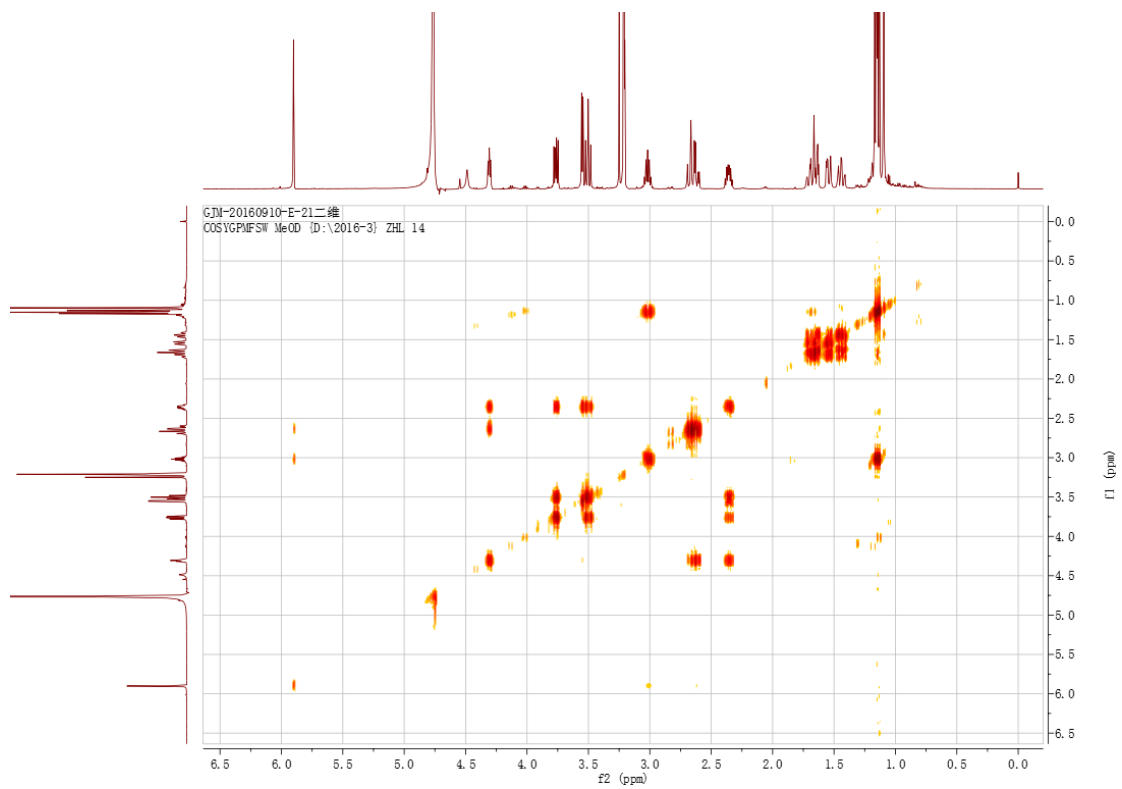

**Figure S18.** HMBC and NOESY spectra of compound **4** in CD<sub>3</sub>OD.

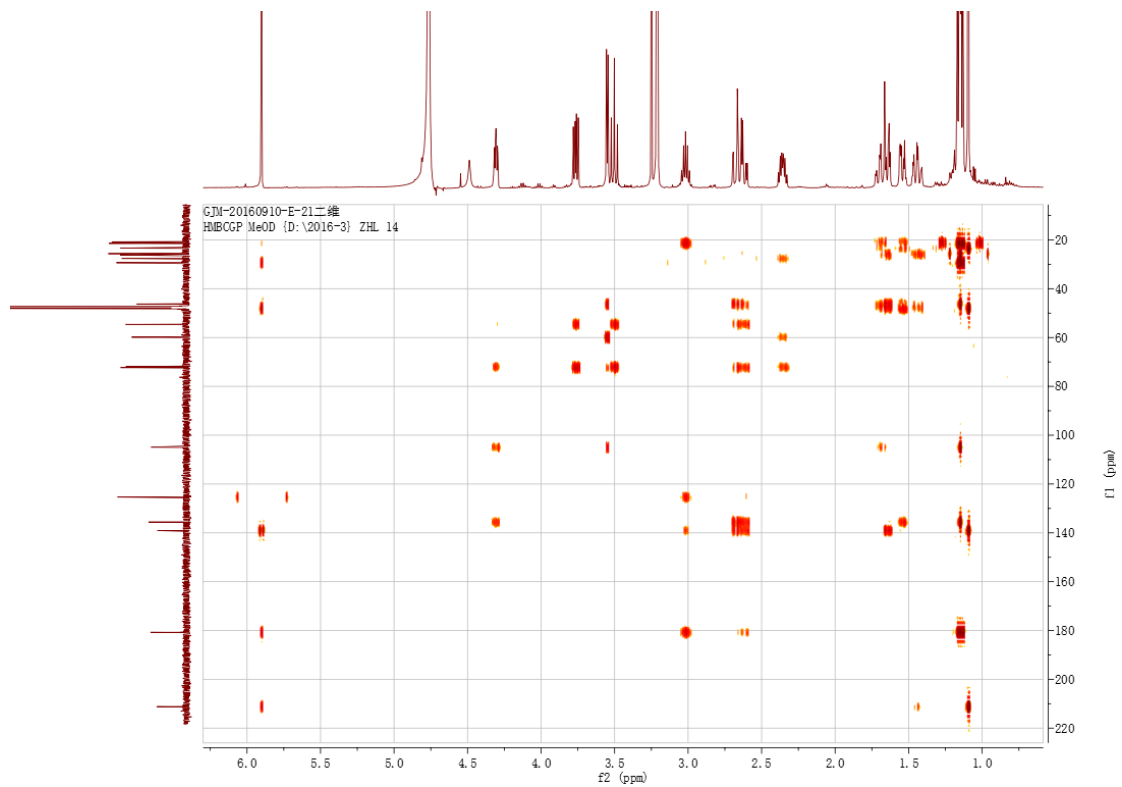

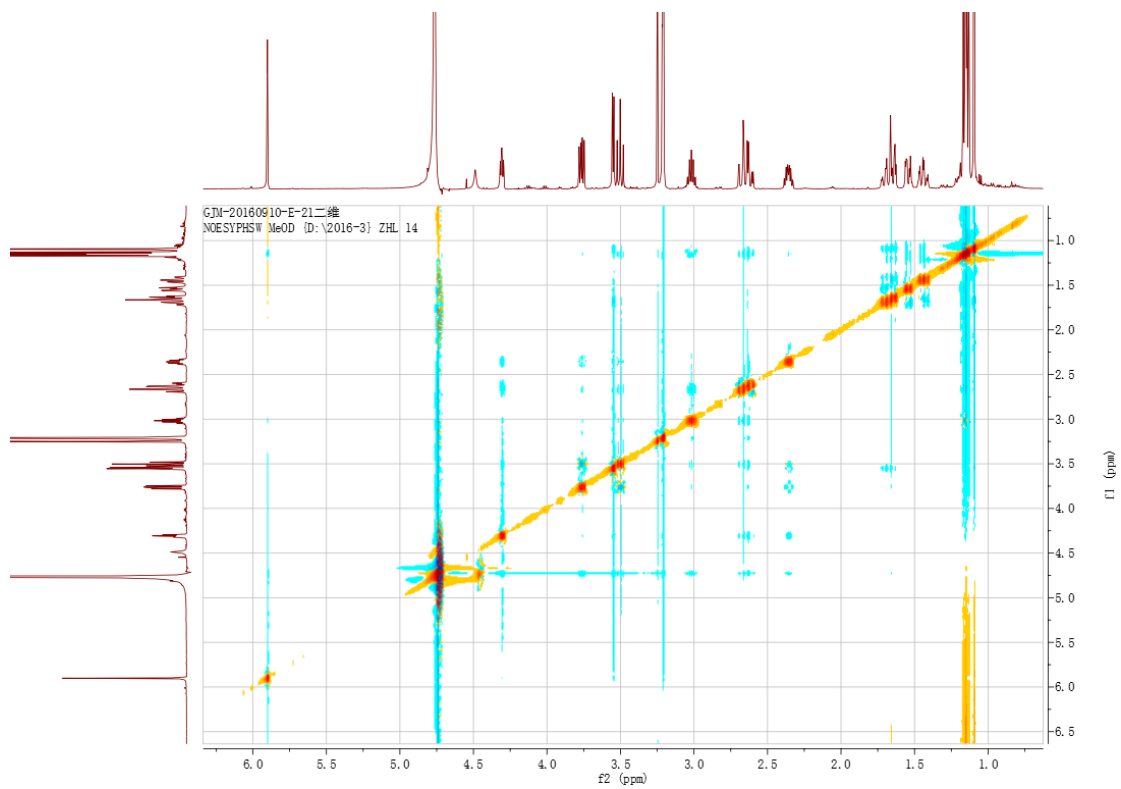

**Figure S19.** HRESIMS spectrum of compound **4**.

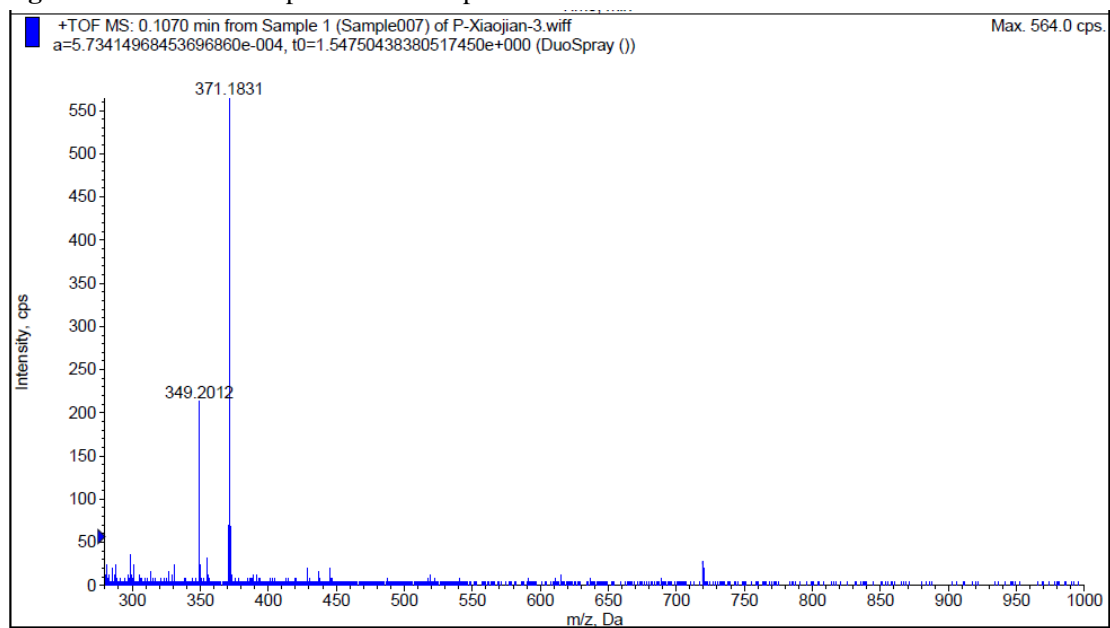

**Figure S20.** IR and UV spectra of compound **4**.

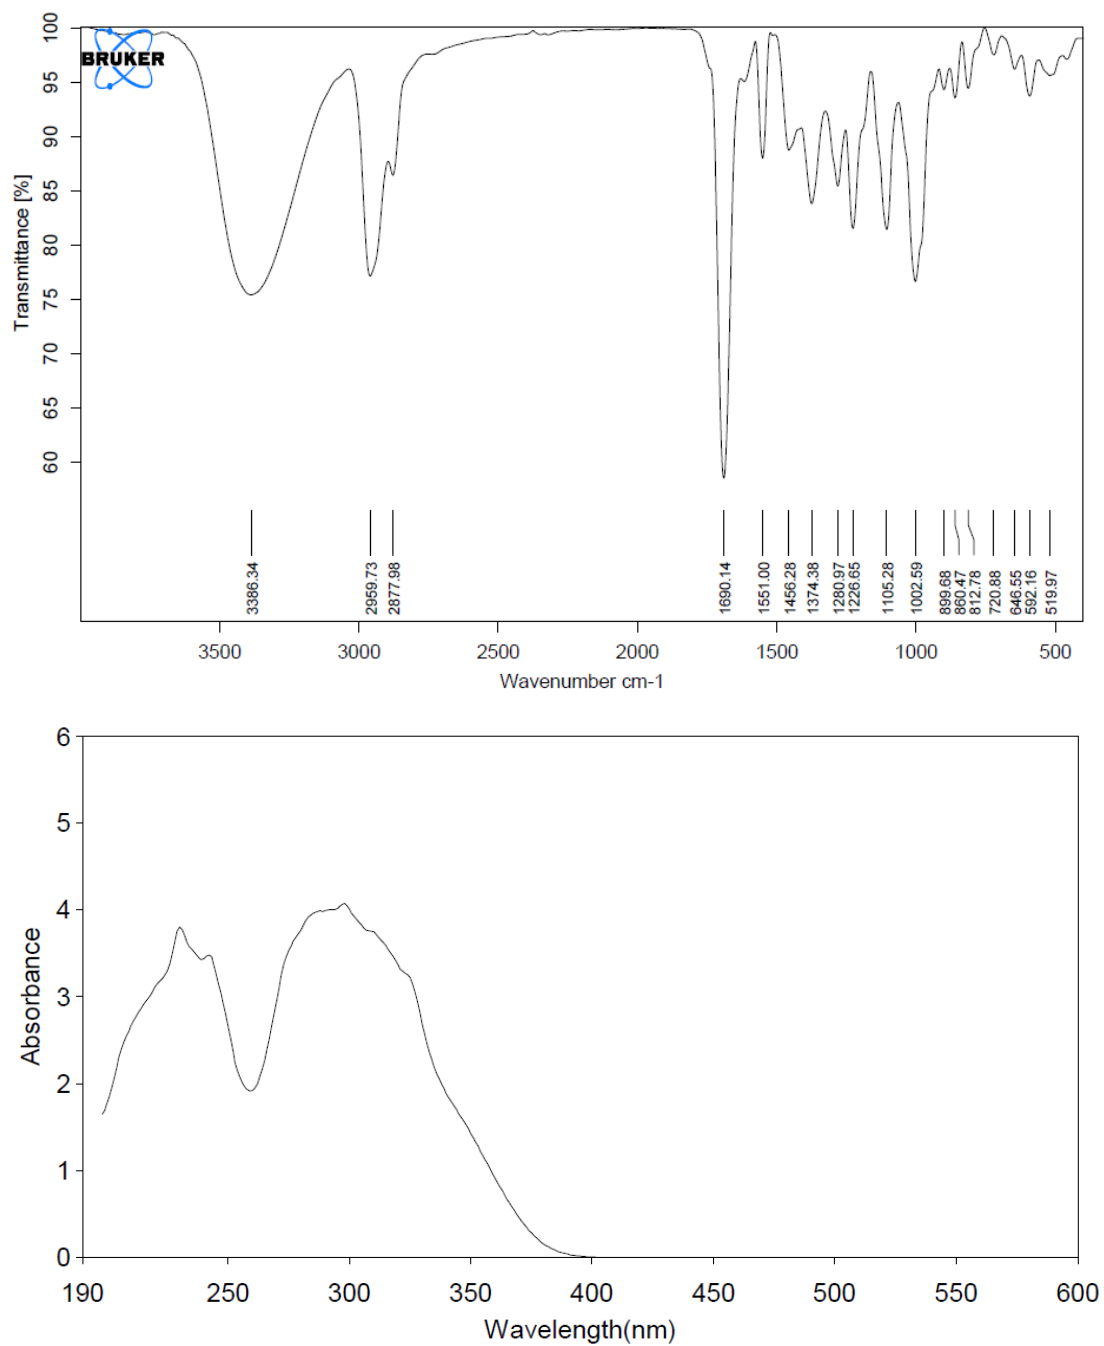

**Figure S21.** <sup>1</sup>H NMR and <sup>13</sup>C spectra of compound **5** in CD<sub>3</sub>OD.

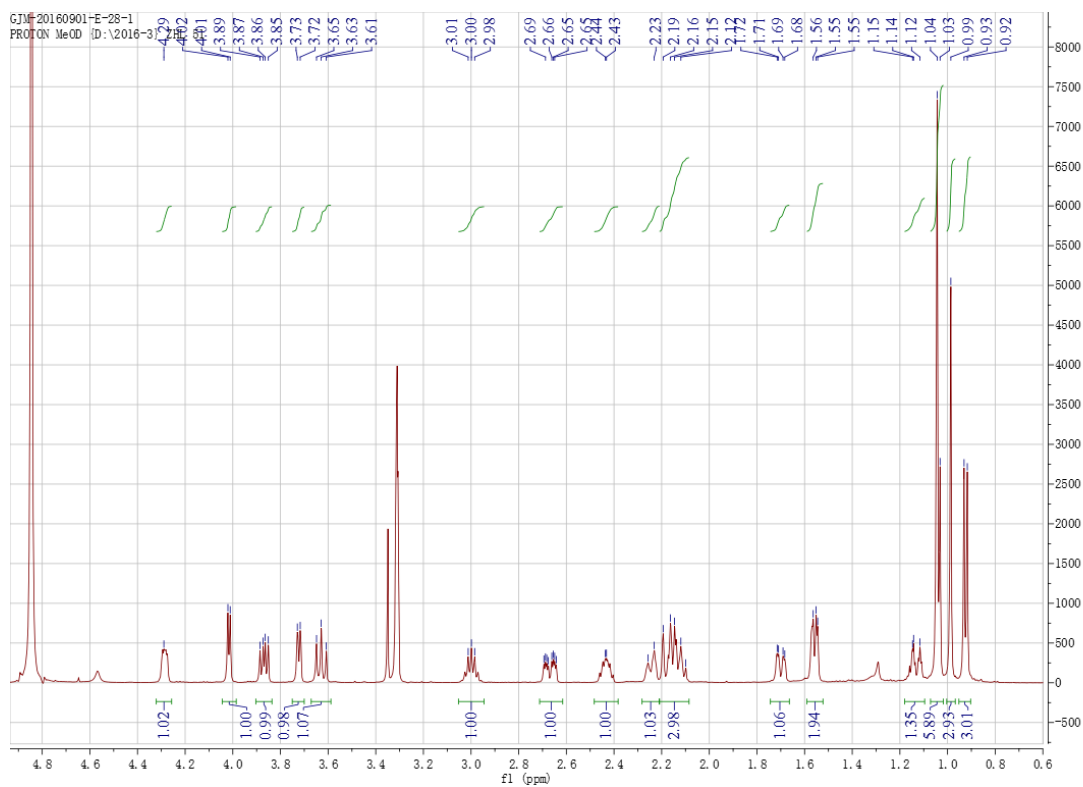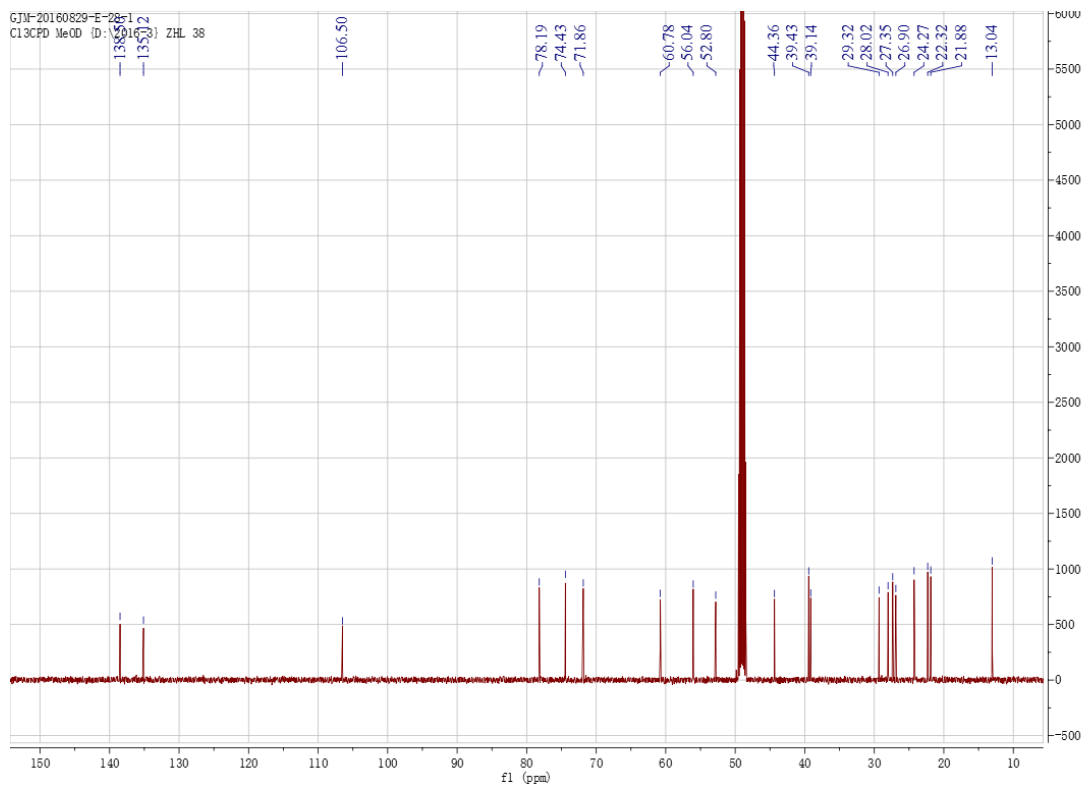

**Figure S22.** HSQC and  $^1\text{H}$ - $^1\text{H}$  COSY spectra of compound **5** in  $\text{CD}_3\text{OD}$ .

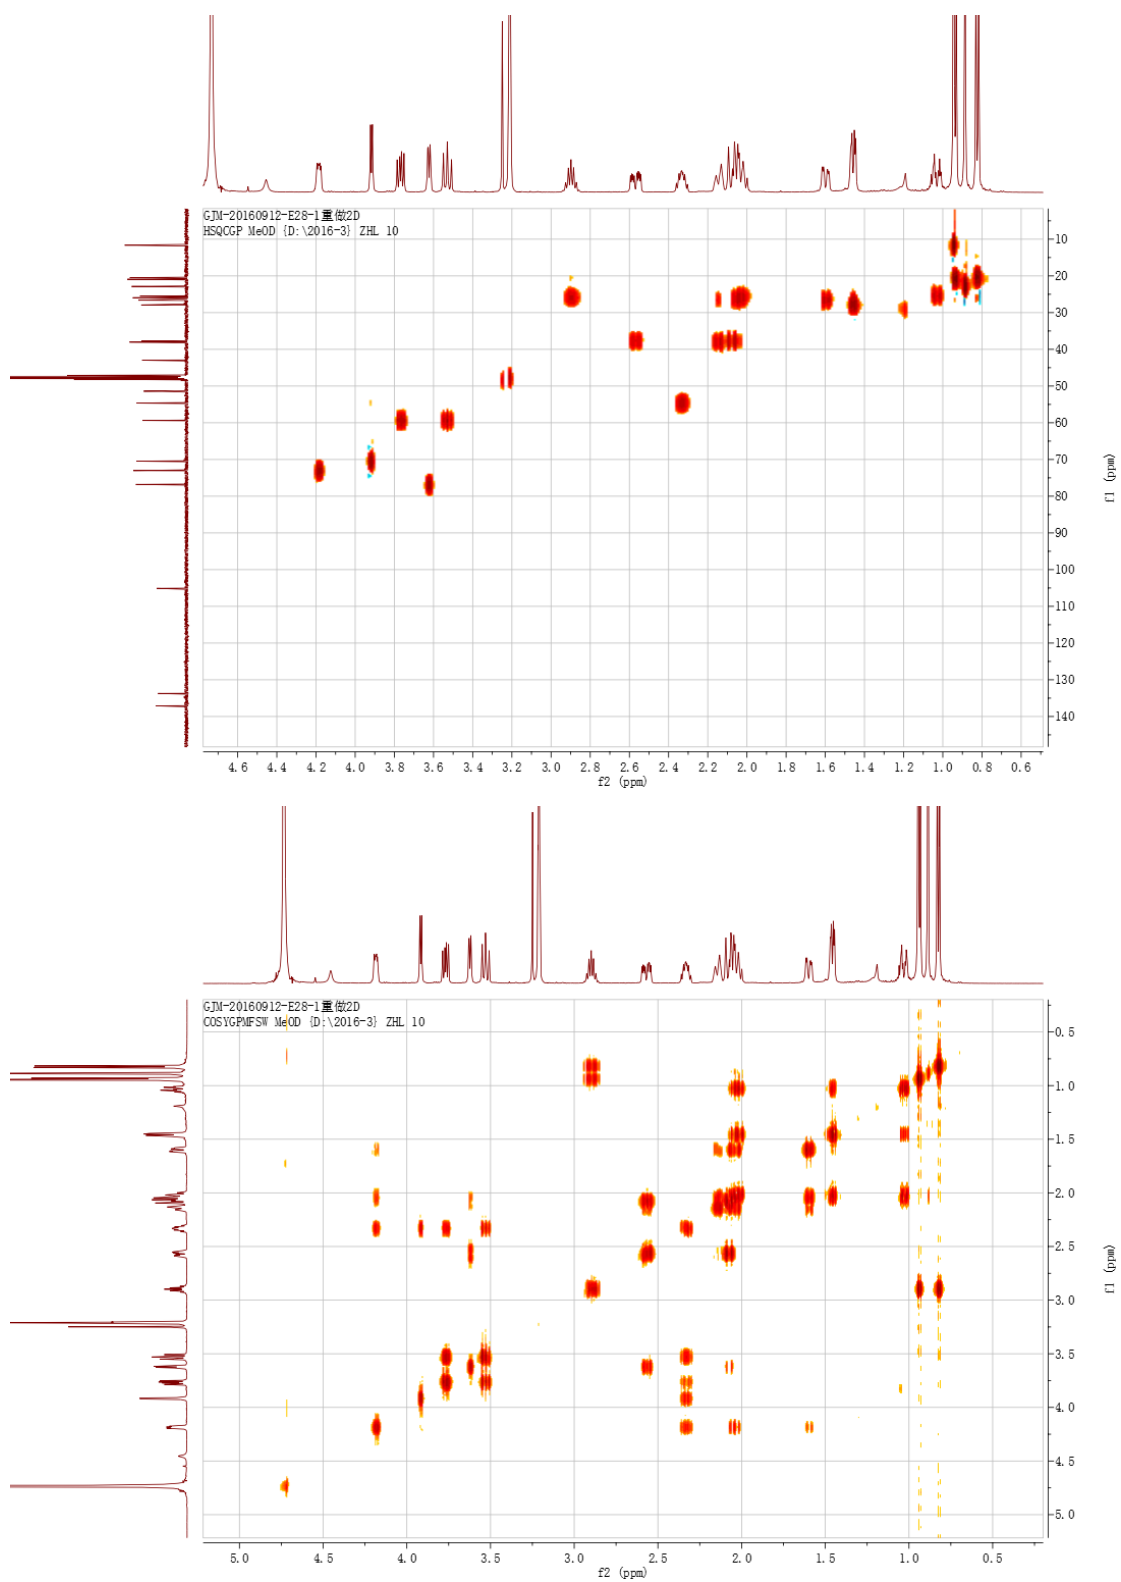

**Figure S23.** HMBC and NOESY spectra of compound **5** in CD<sub>3</sub>OD.

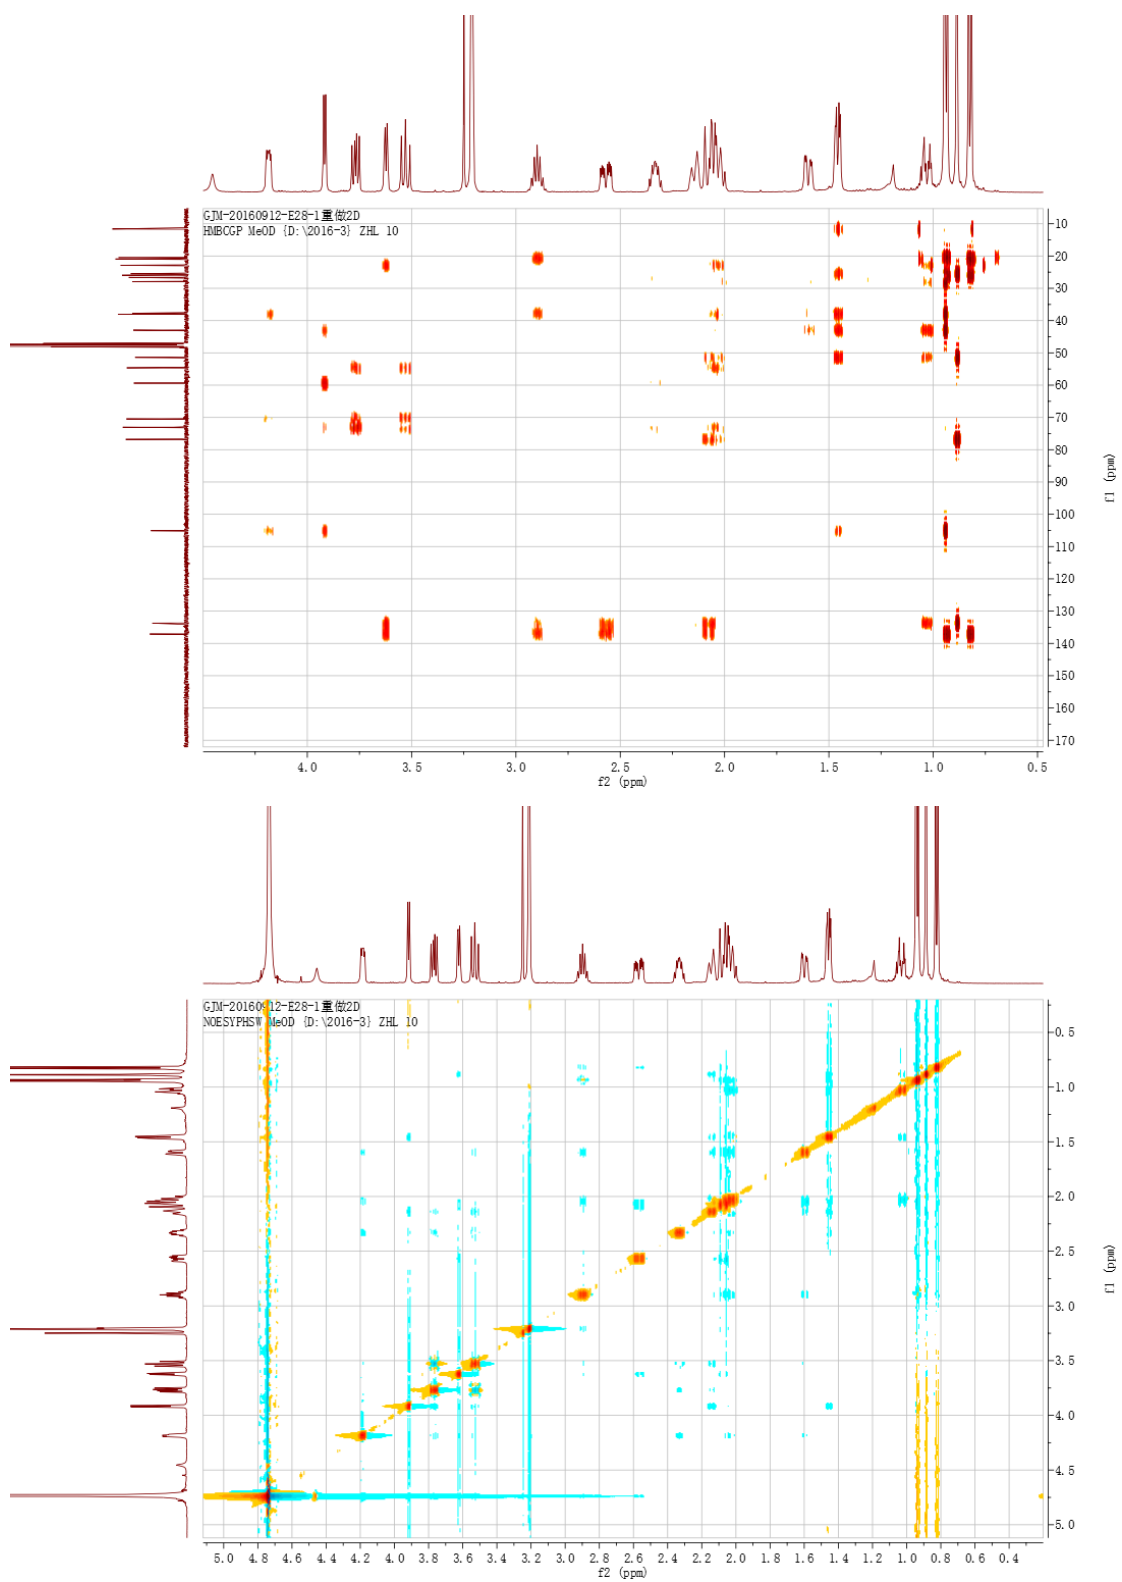

**Figure S24.** HRESIMS spectrum of compound 5.

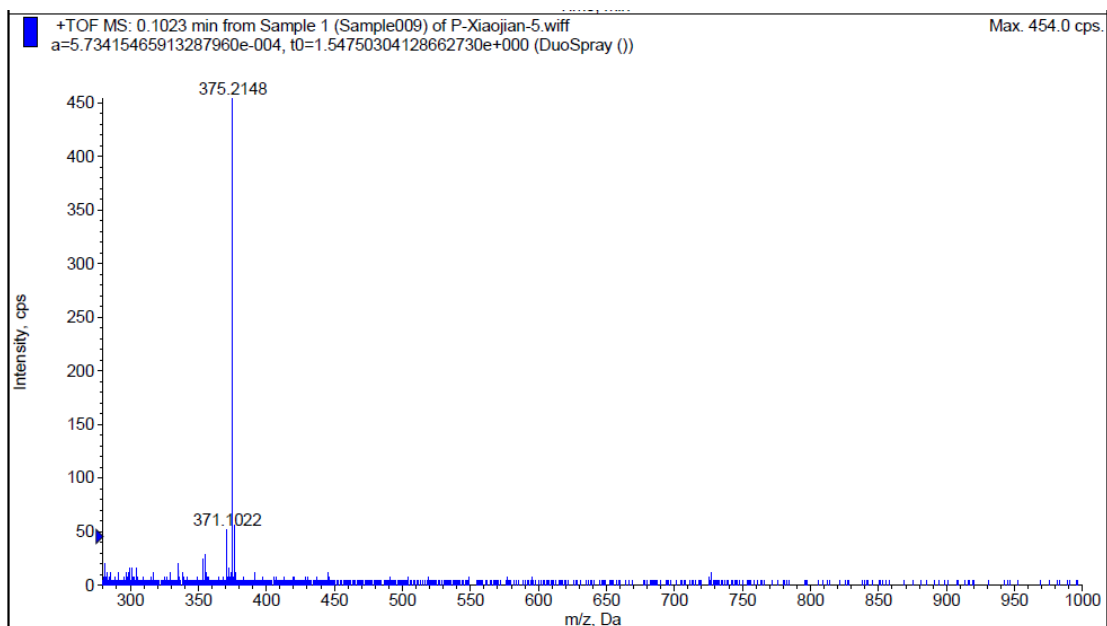

Figure S25. IR and UV spectra of compound 5.

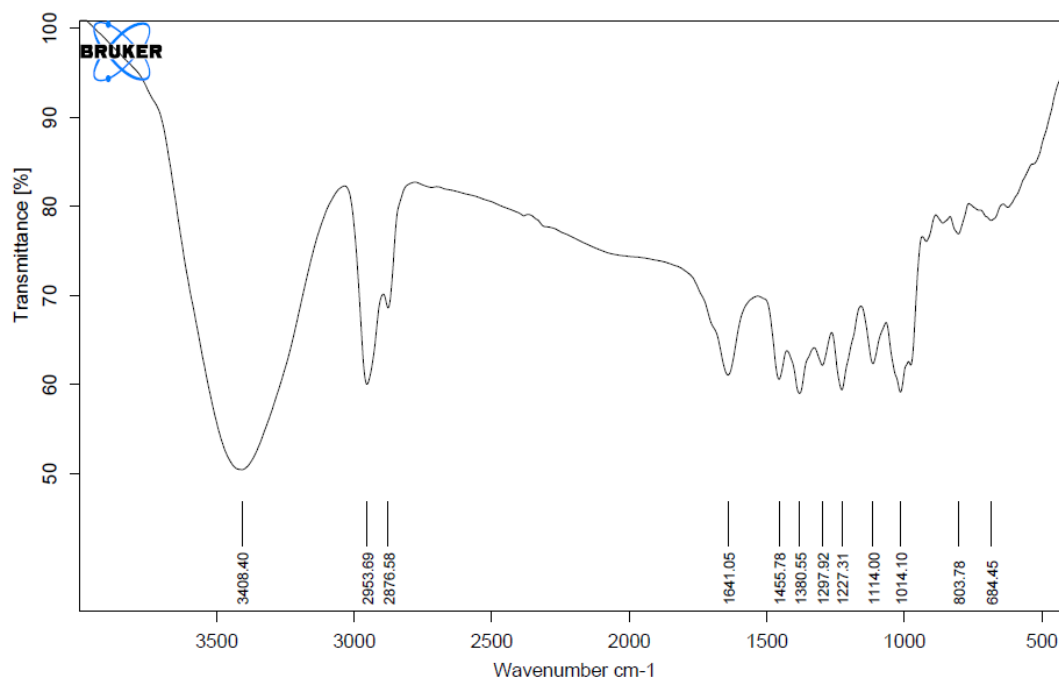



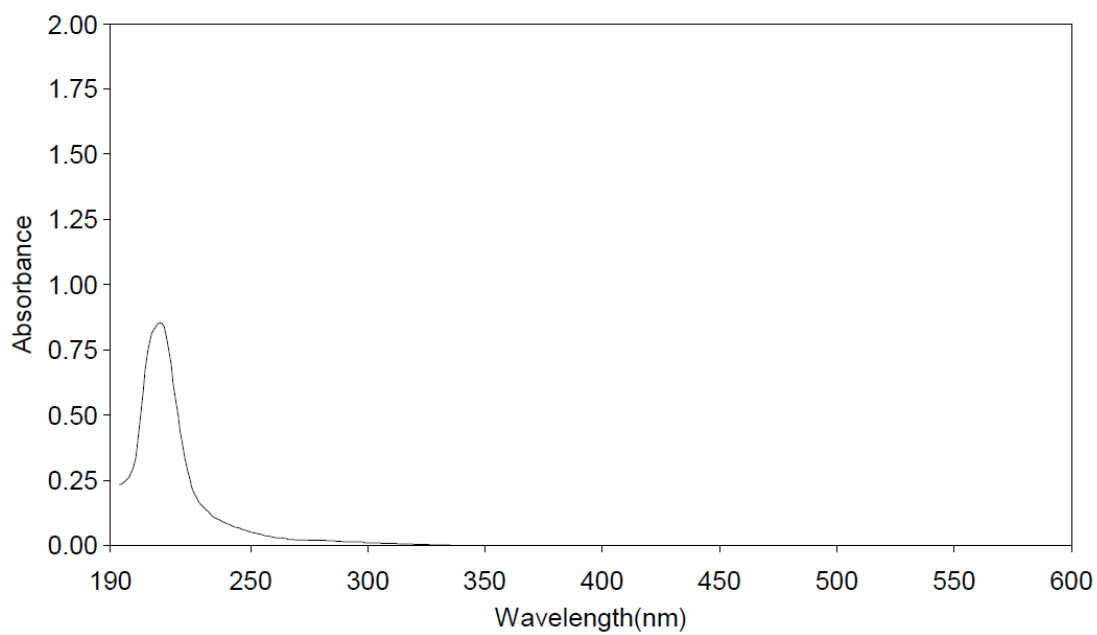

**Figure S26.**  $^1\text{H}$  NMR and  $^{13}\text{C}$  spectra of compound **6** in  $\text{CD}_3\text{OD}$ .

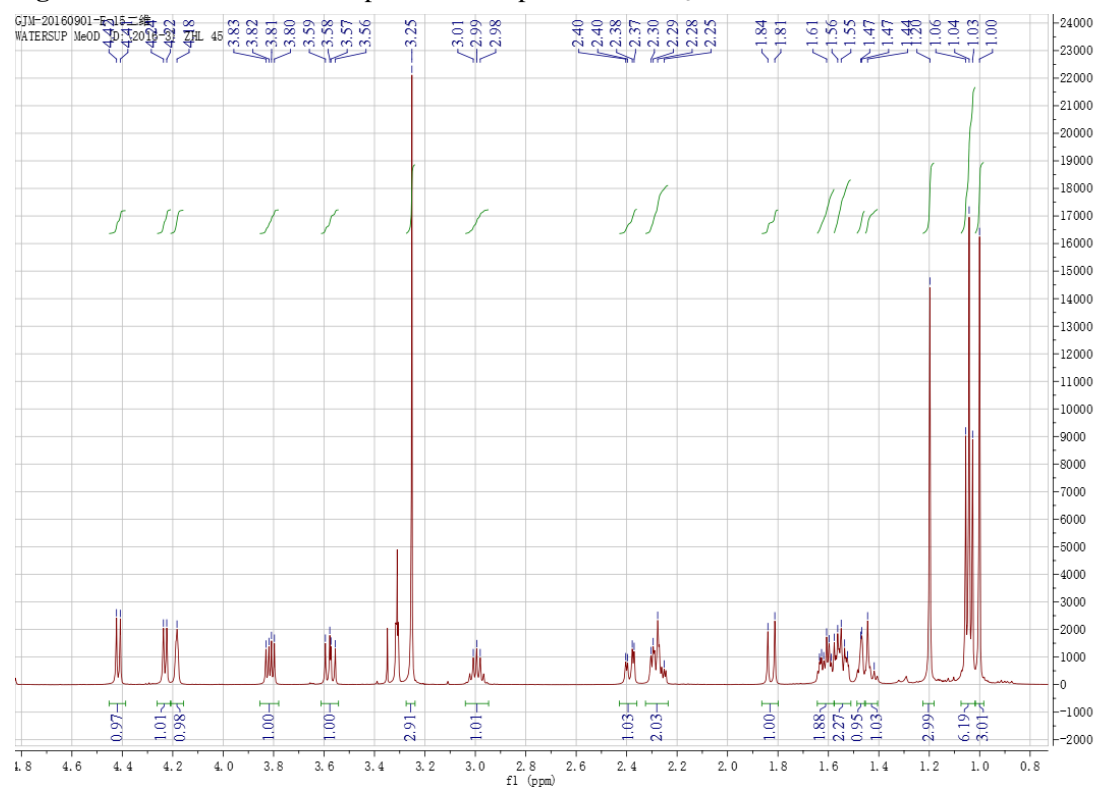

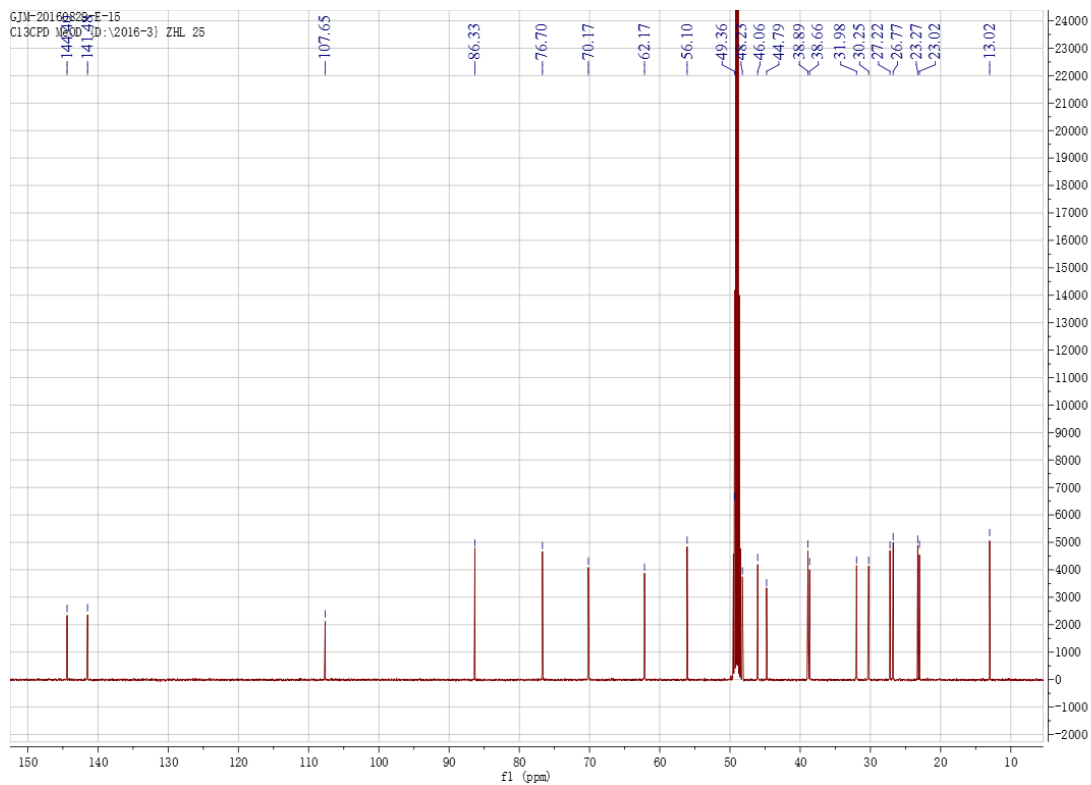

**Figure S27.** HSQC and  $^1\text{H}$ - $^1\text{H}$  COSY spectra of compound **6** in  $\text{CD}_3\text{OD}$ .

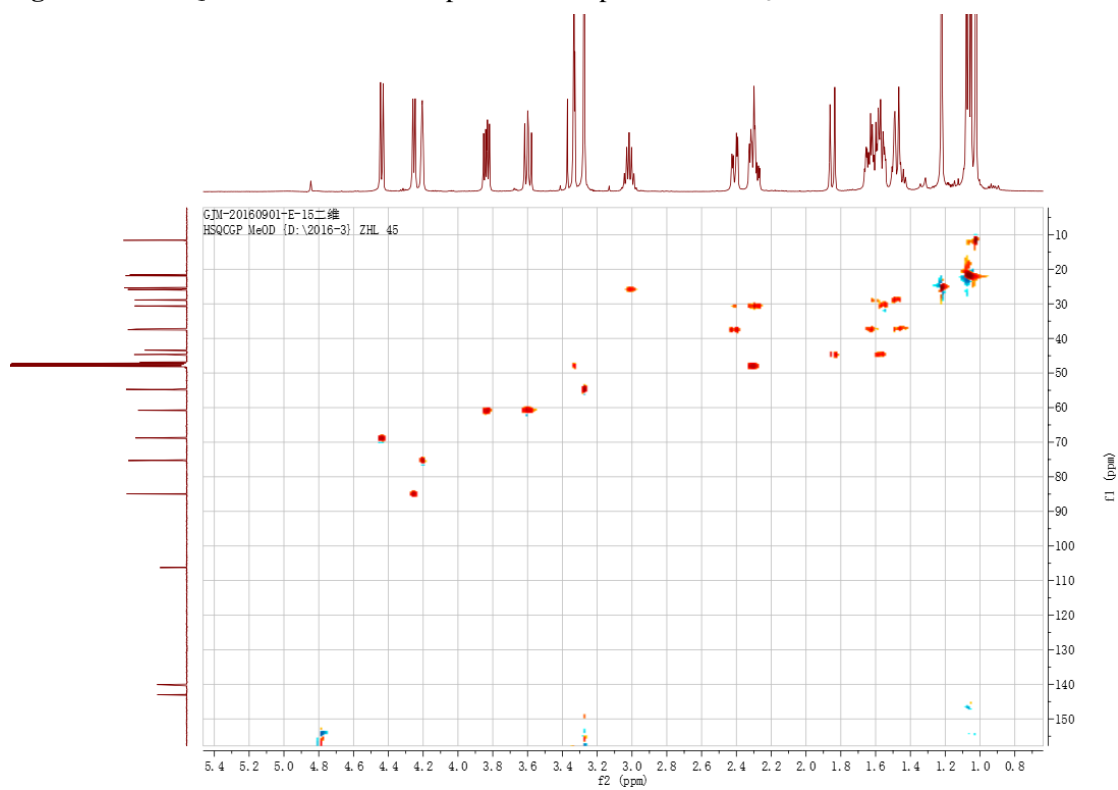

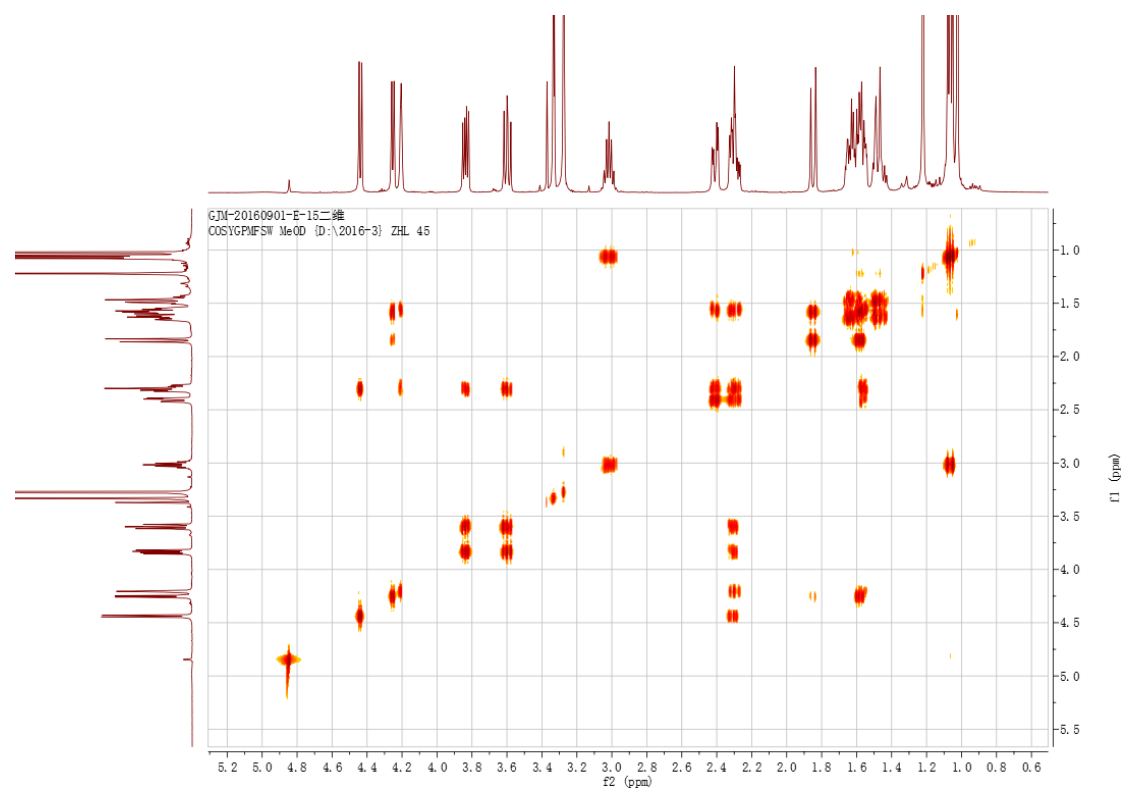

**Figure S28.** HMBC and NOESY spectra of compound **6** in CD<sub>3</sub>OD.

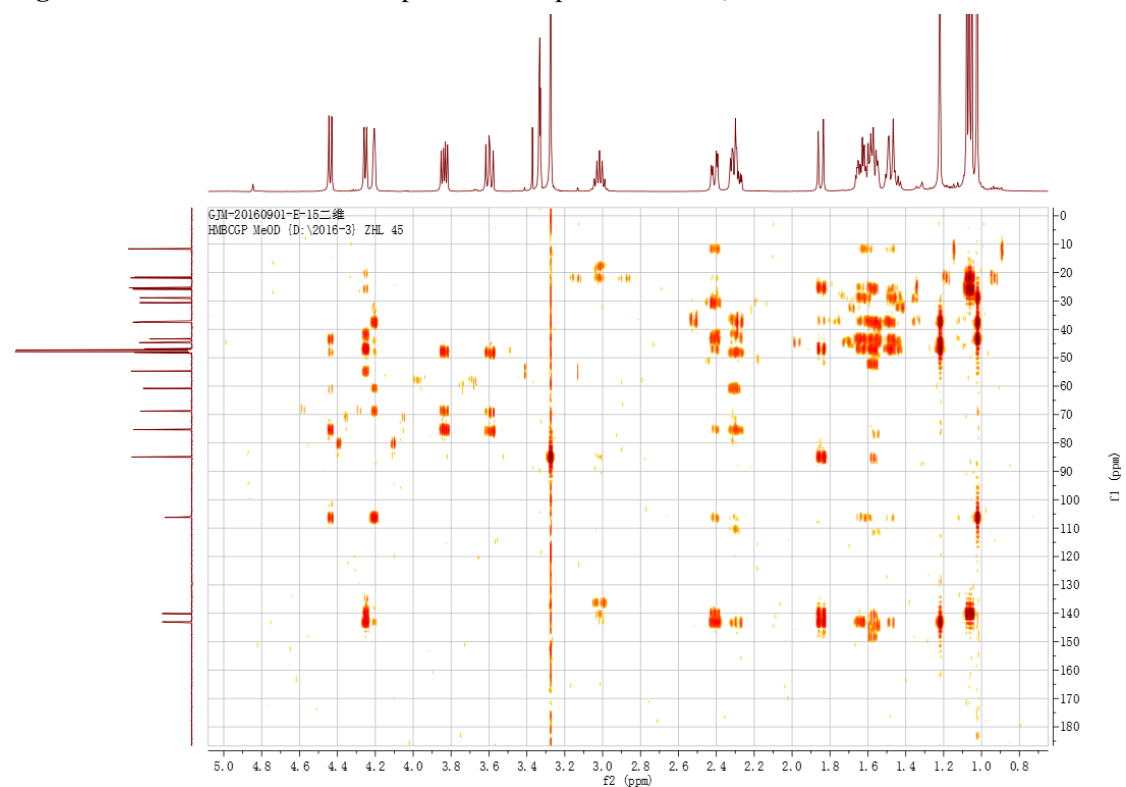

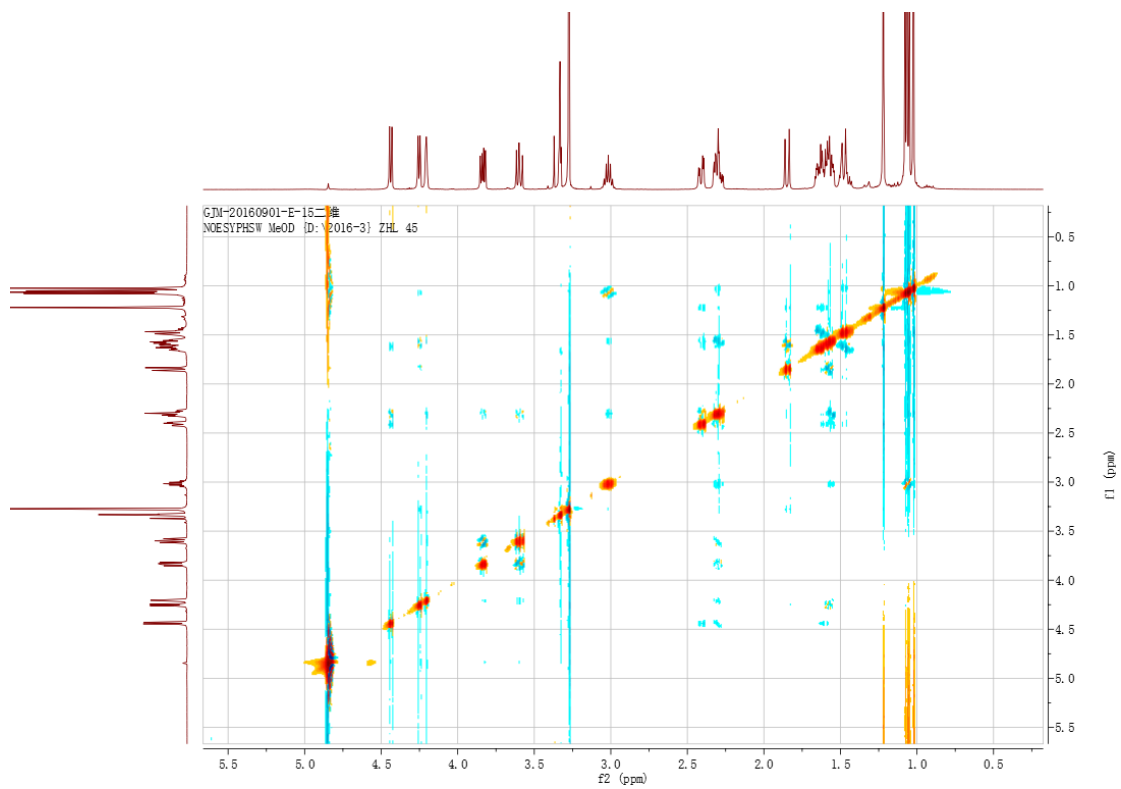

**Figure S29.** HRESIMS spectrum of compound **6**.

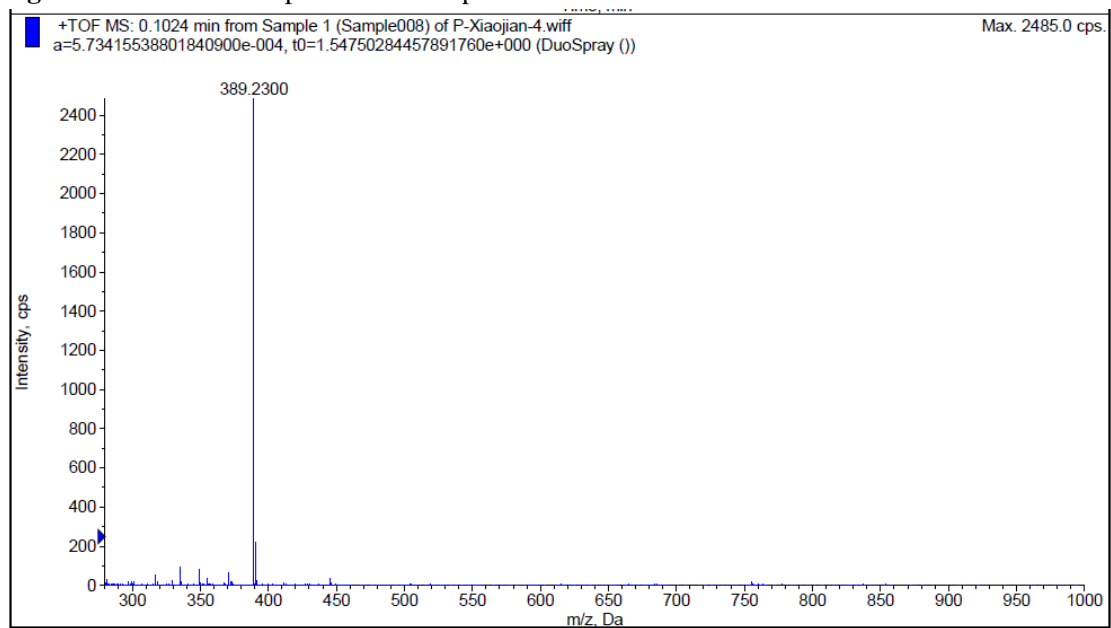

**Figure S30.** IR and UV spectra of compound **6**.

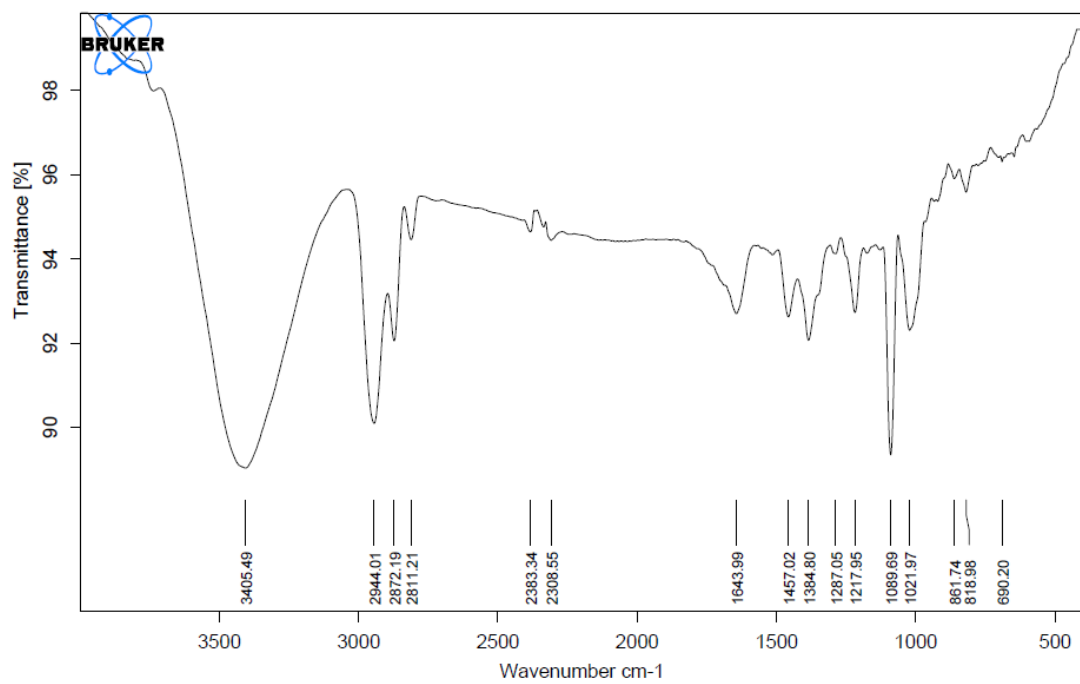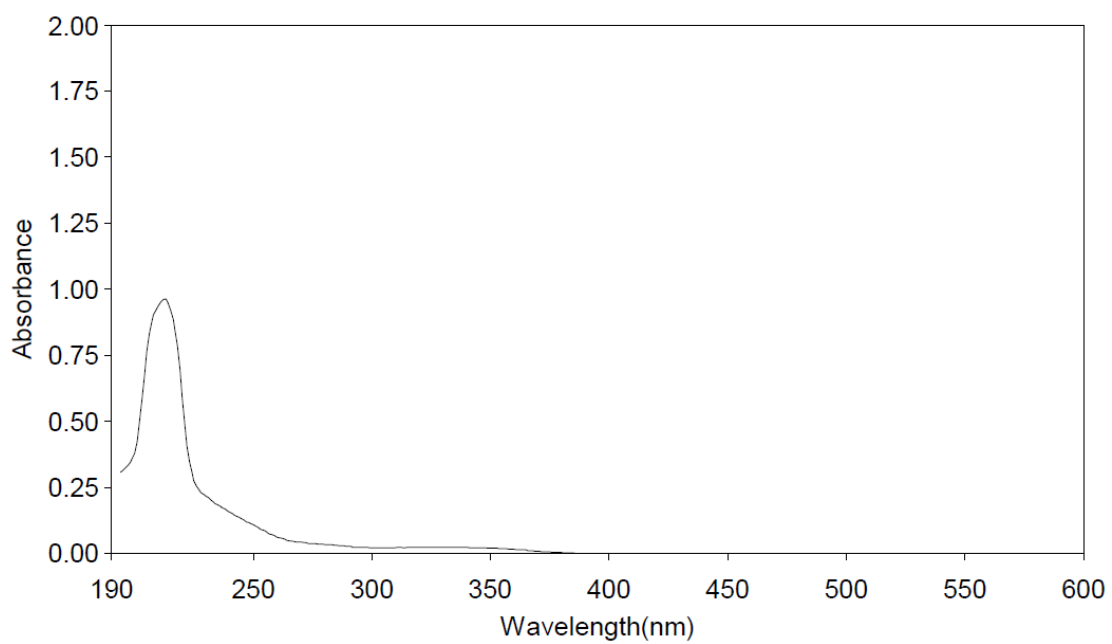

**Figure S31.** <sup>1</sup>H NMR and <sup>13</sup>C spectra of compound **7** in CD<sub>3</sub>OD.

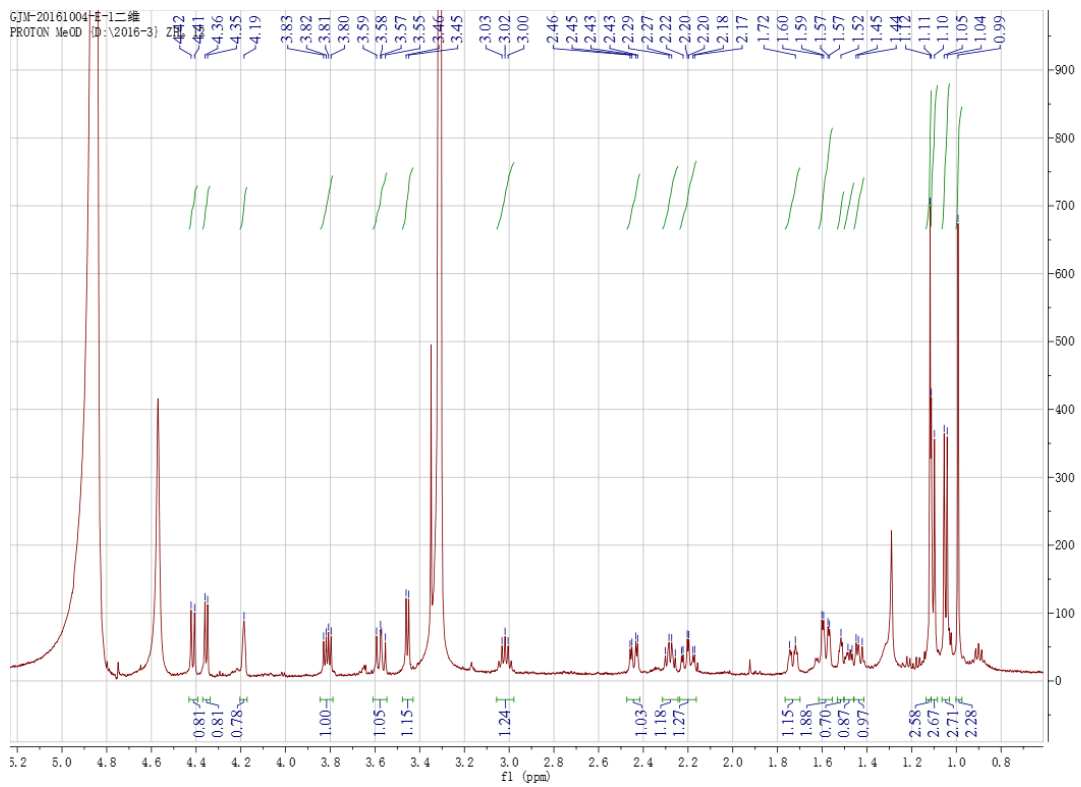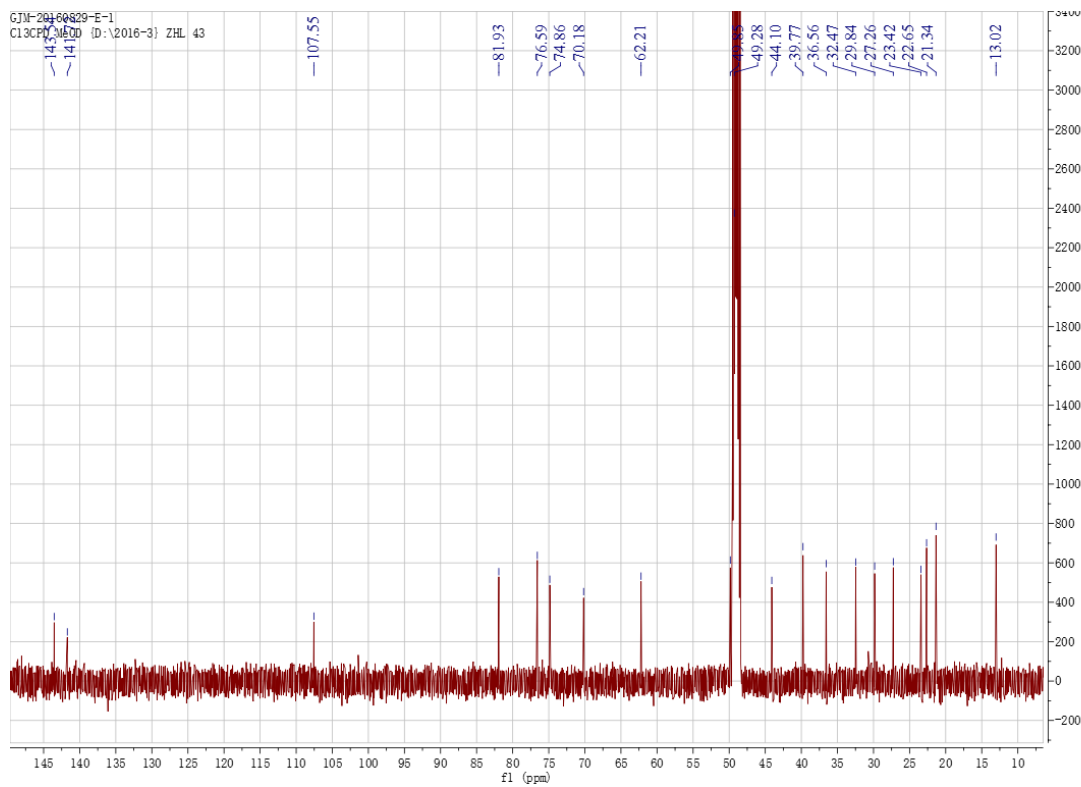

Figure S32. HSQC and  $^1\text{H}$ - $^1\text{H}$  COSY spectra of compound **7** in  $\text{CD}_3\text{OD}$ .

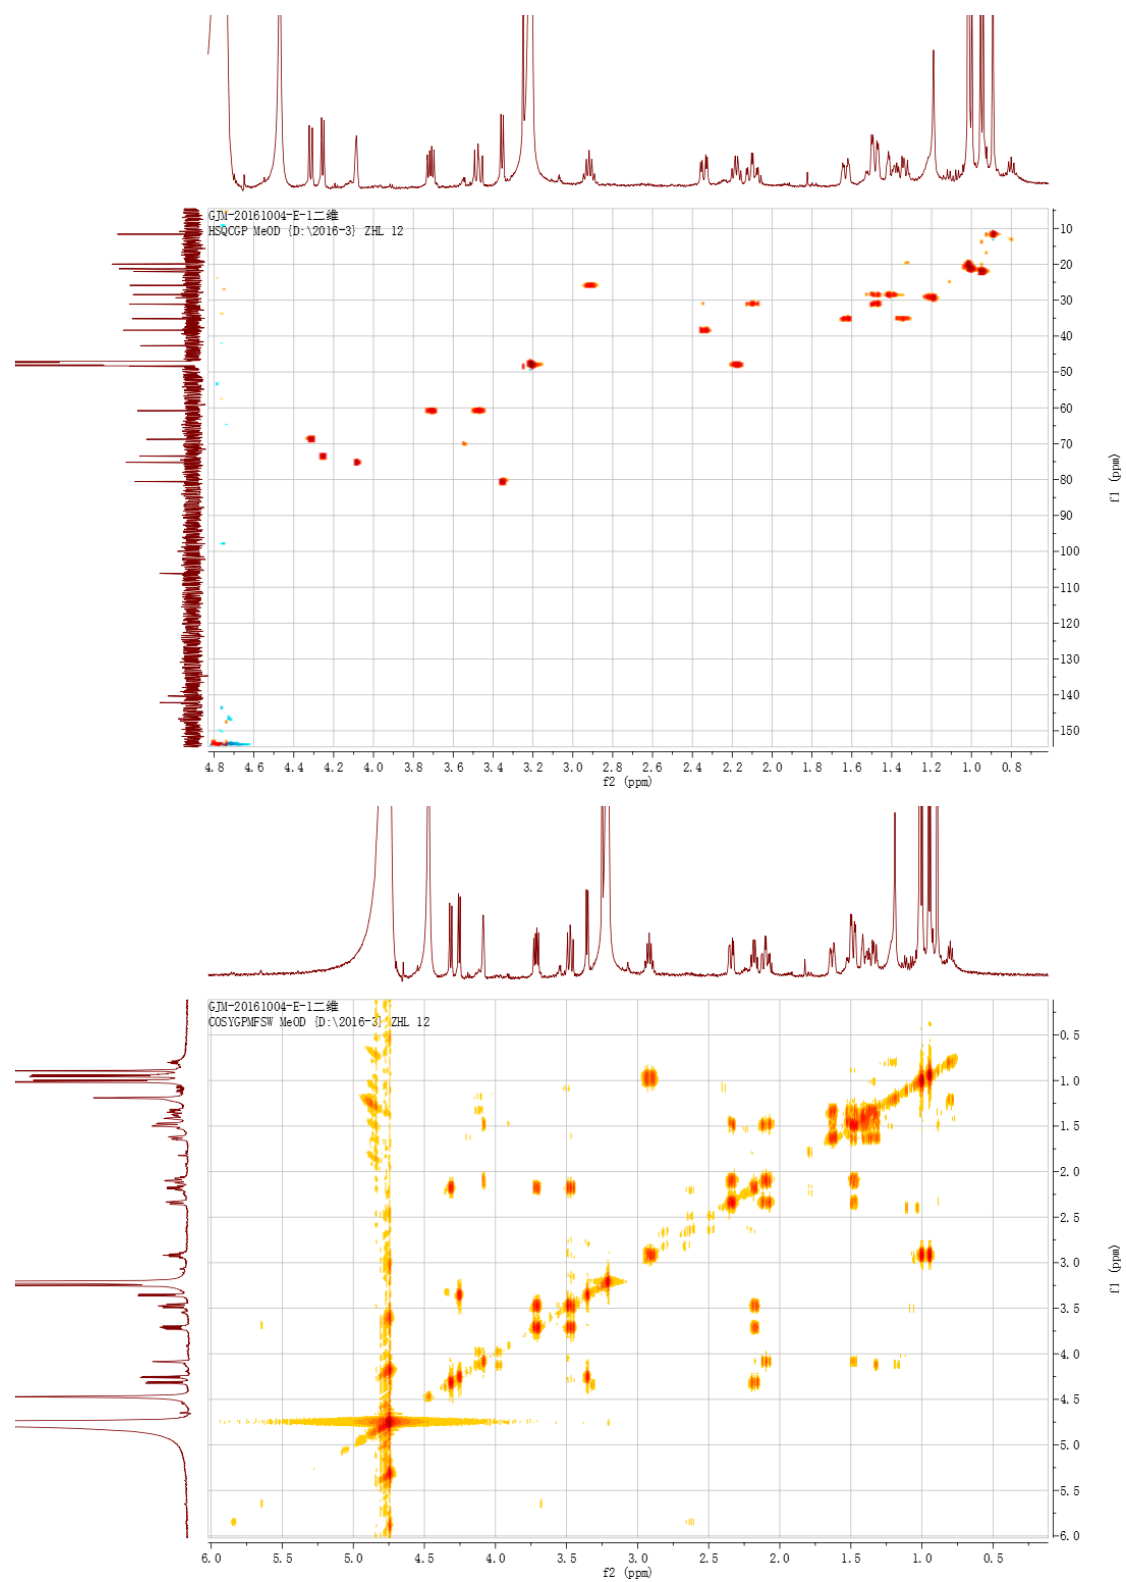

**Figure S33.** HMBC and NOESY spectra of compound **7** in CD<sub>3</sub>OD.

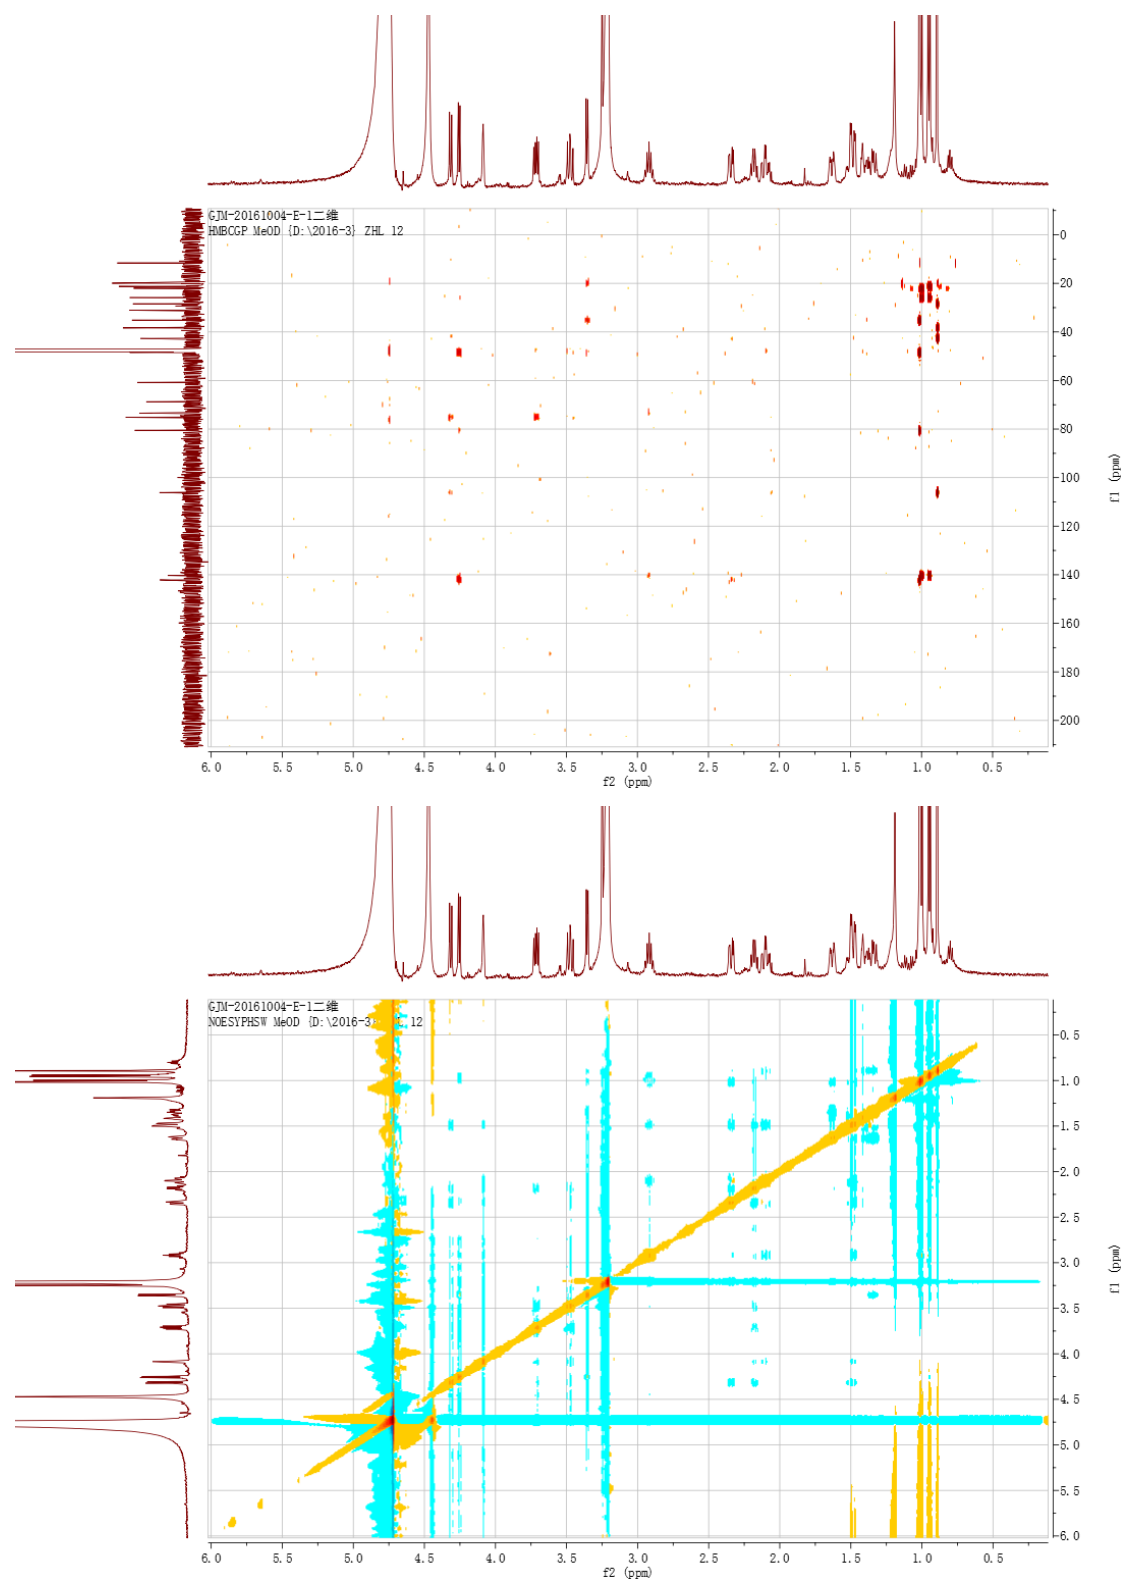

Figure S34. HRESIMS spectrum of compound 7.



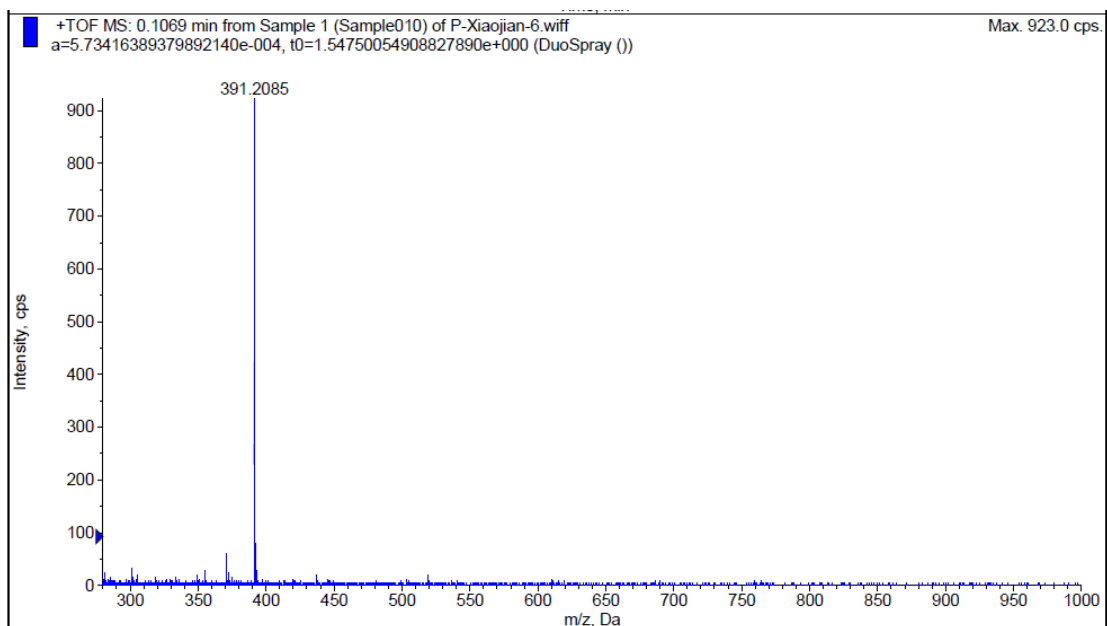

Figure S35. IR and UV spectra of compound7.

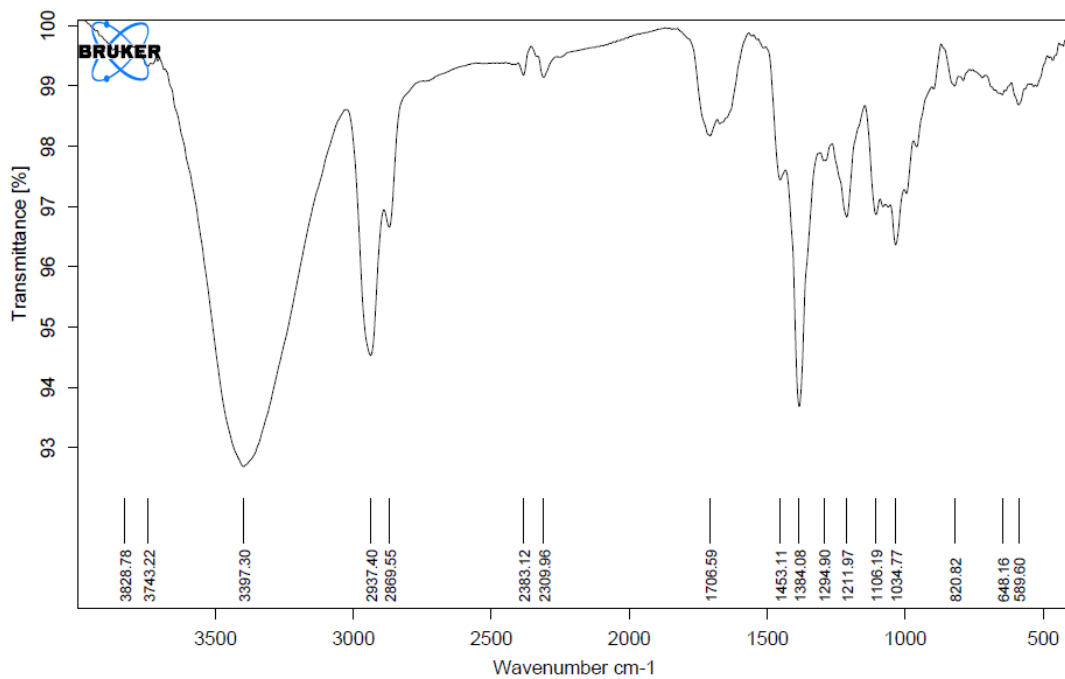

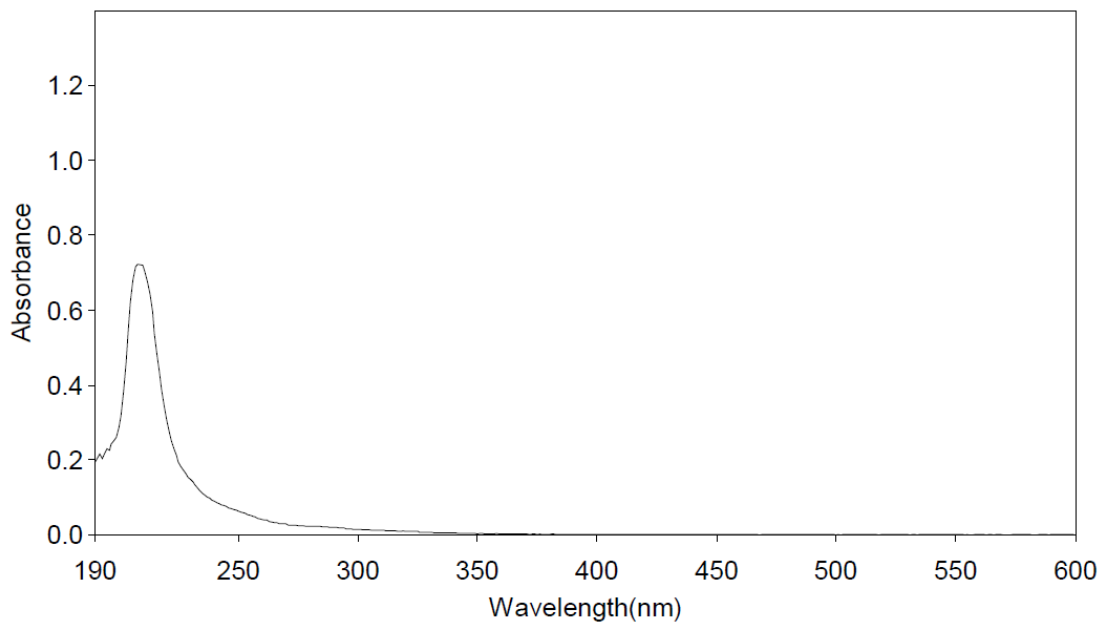

**Figure S36.**  $^1\text{H}$  NMR and  $^{13}\text{C}$  spectra of compound **8** in  $\text{CD}_3\text{OD}$ .

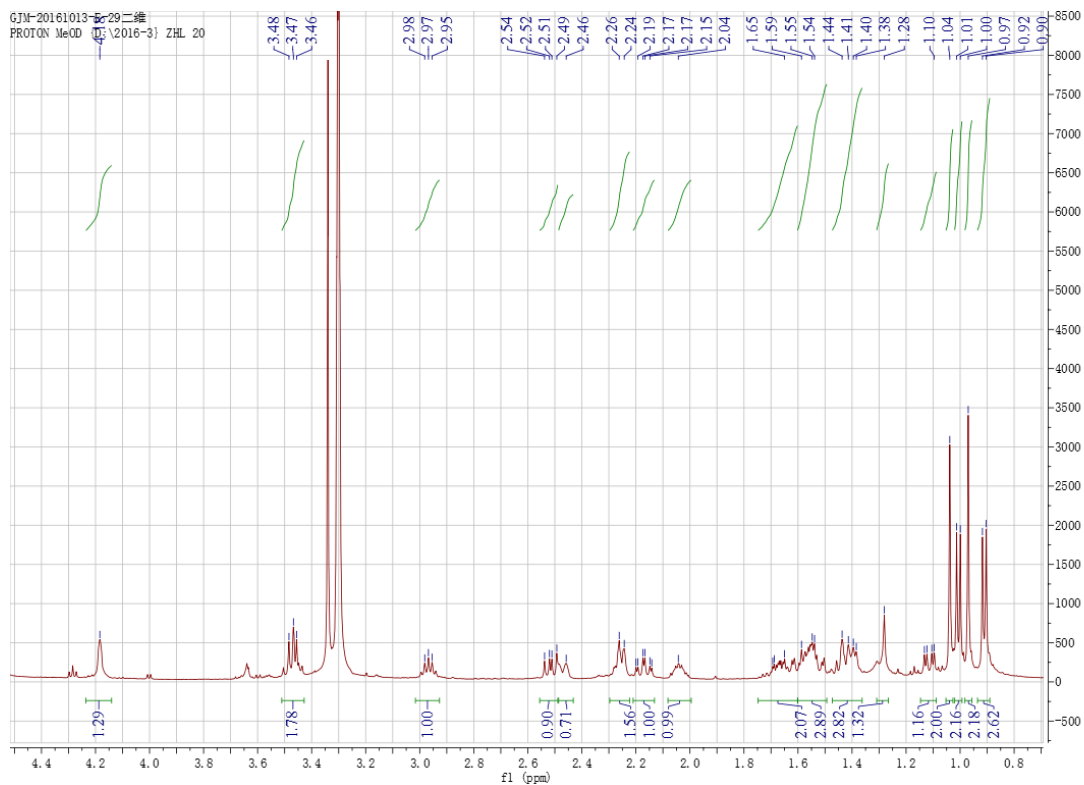

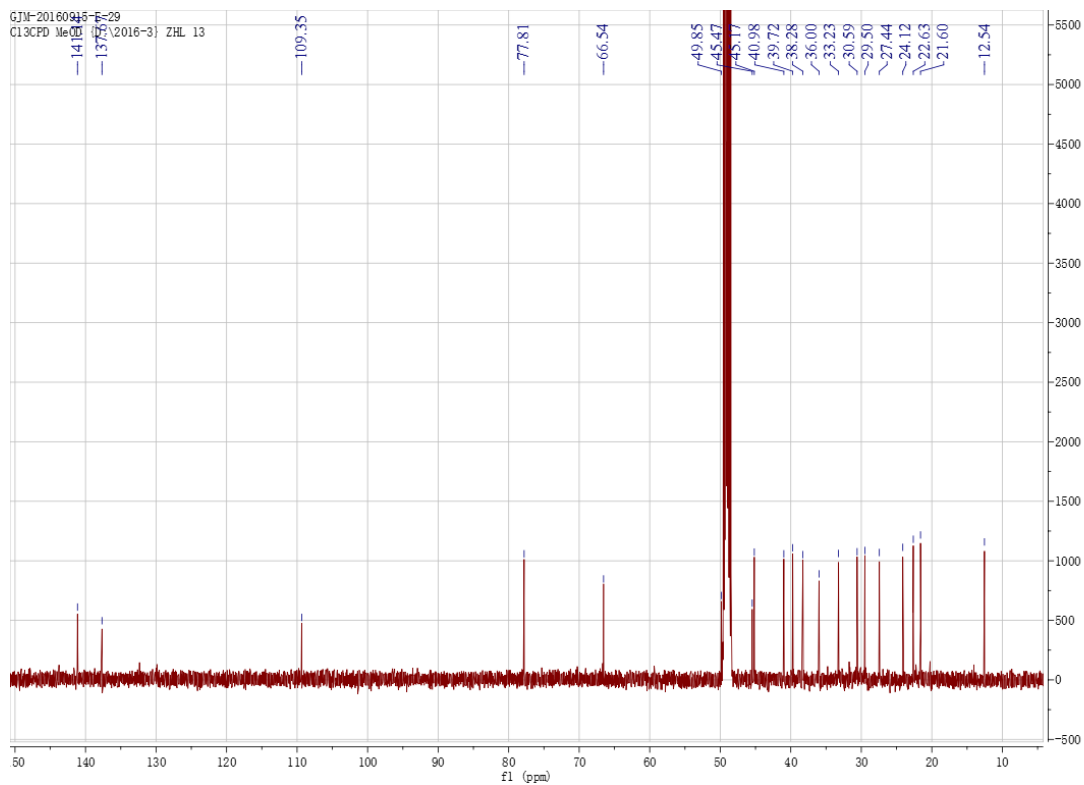

**Figure S37.** HSQC and  $^1\text{H}$ - $^1\text{H}$  COSY spectra of compound **8** in  $\text{CD}_3\text{OD}$ .

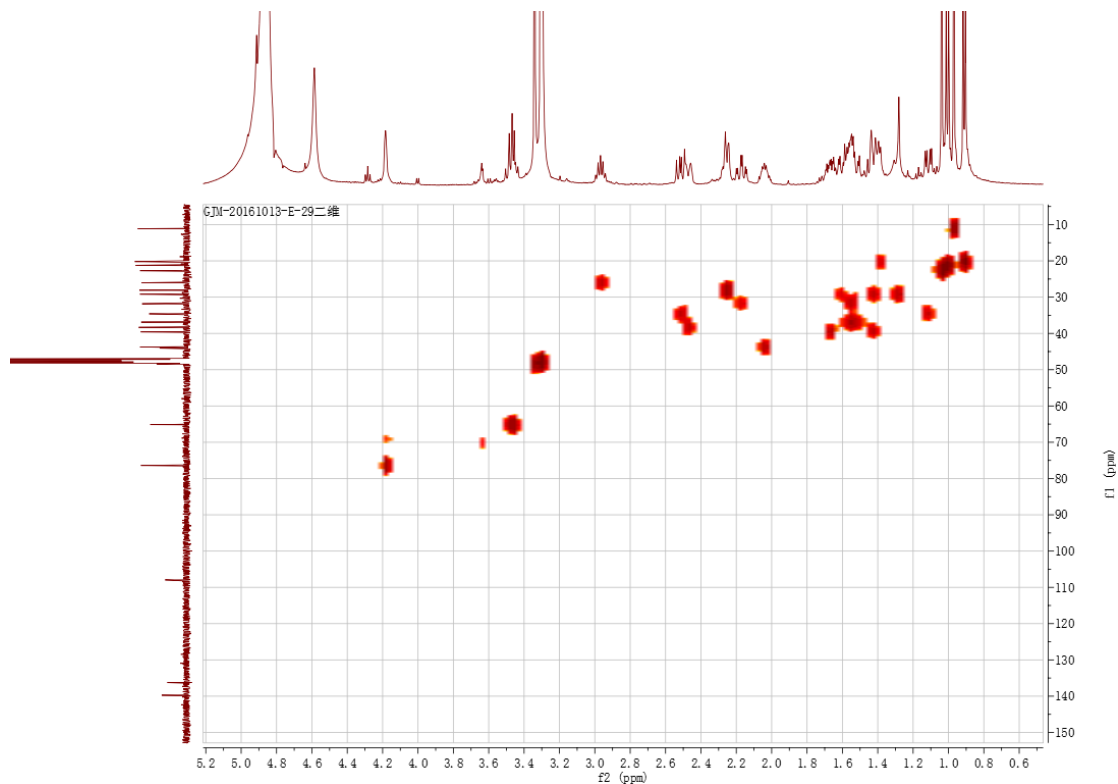

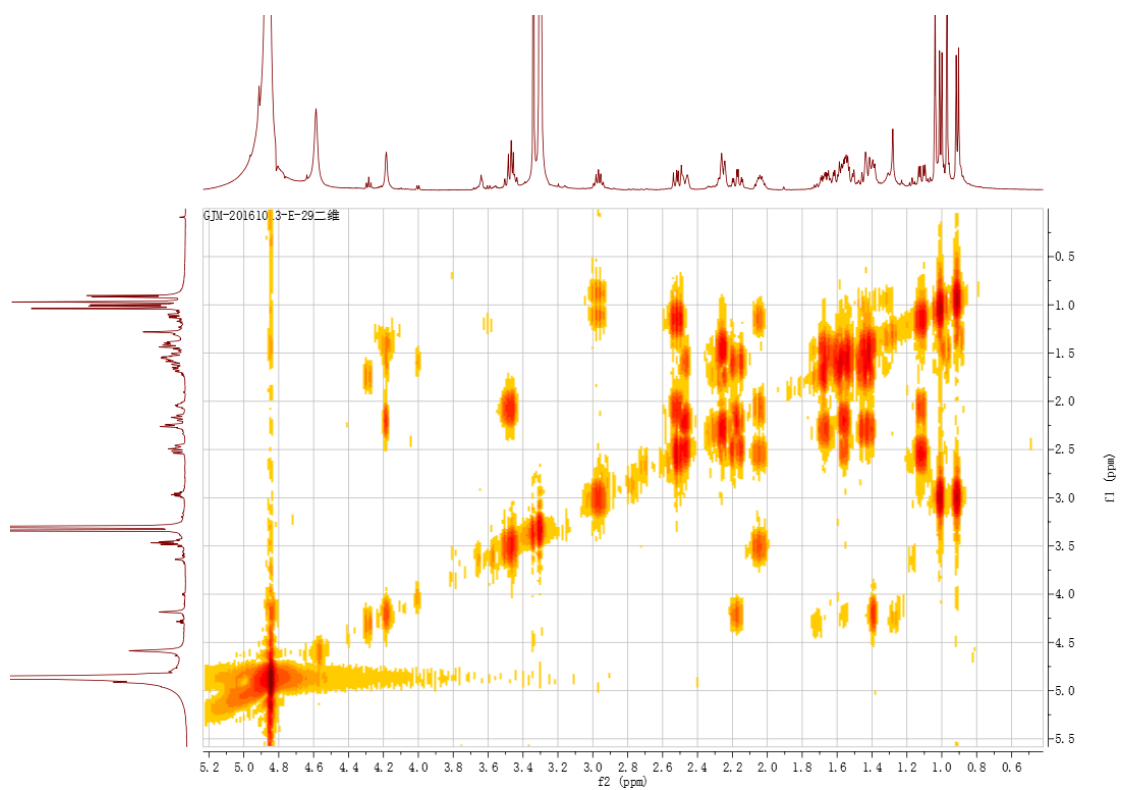

**Figure S38.** HMBC and NOESY spectra of compound **8** in CD<sub>3</sub>OD.

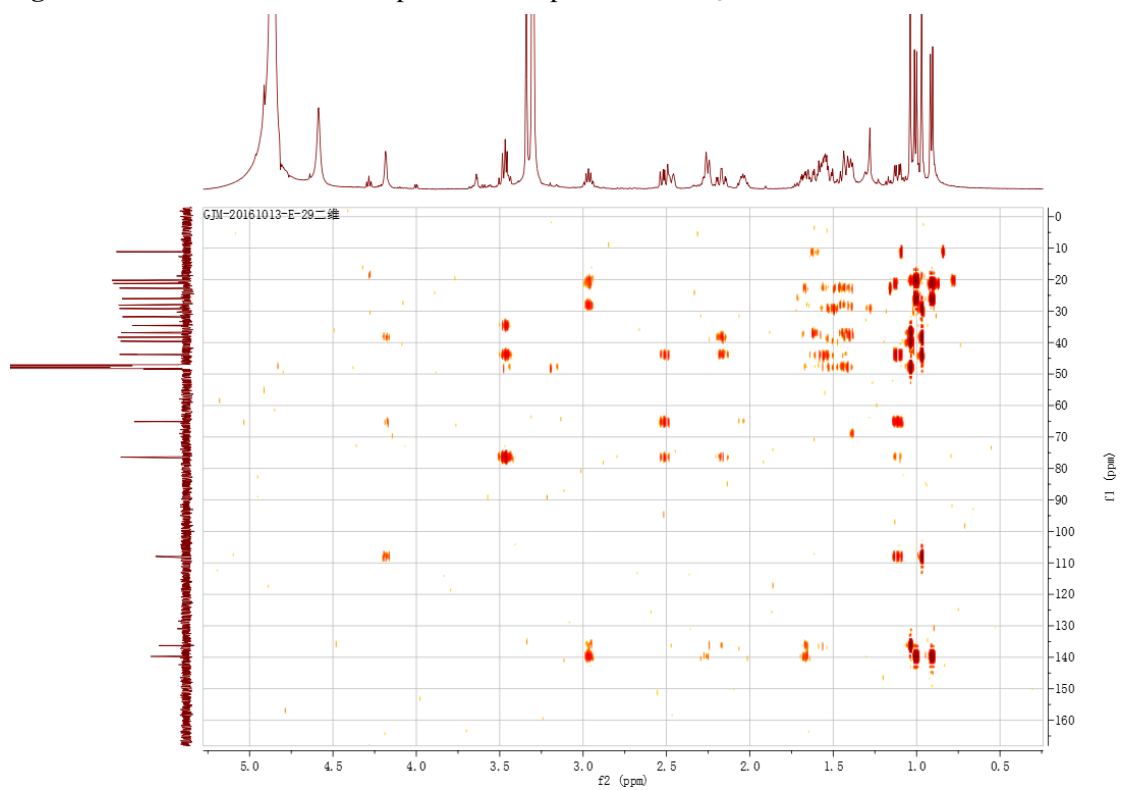

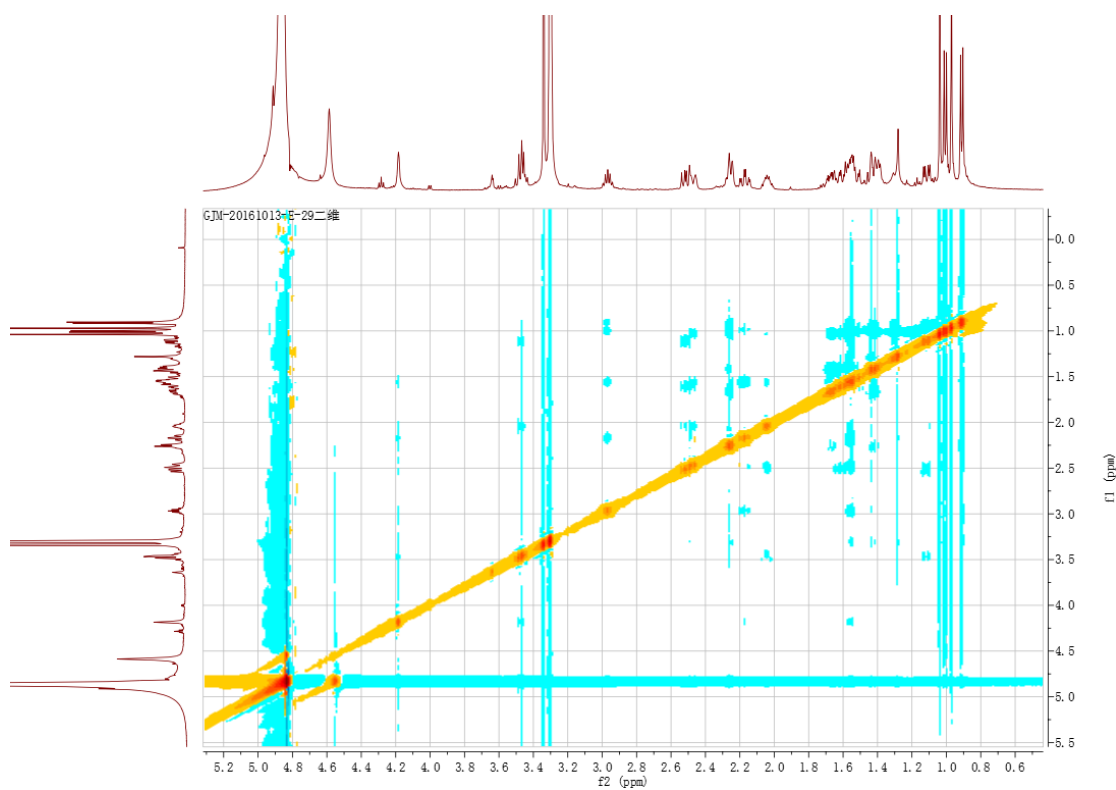

**Figure S39.** HRESIMS spectrum of compound **8**.

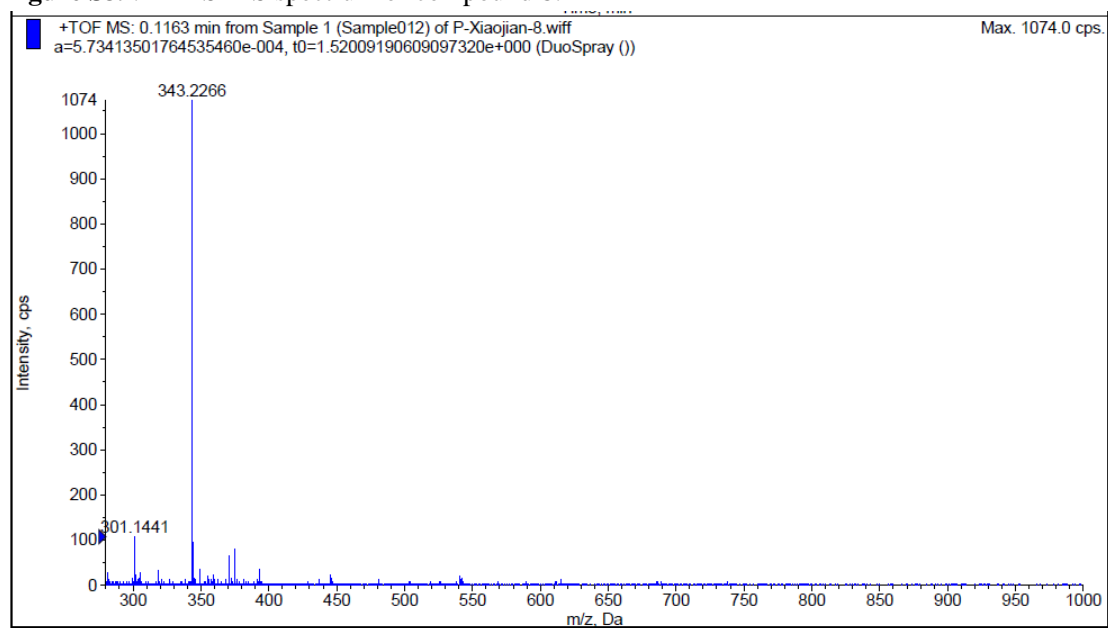

**Figure S40.** IR and UV spectra of compound **8**.

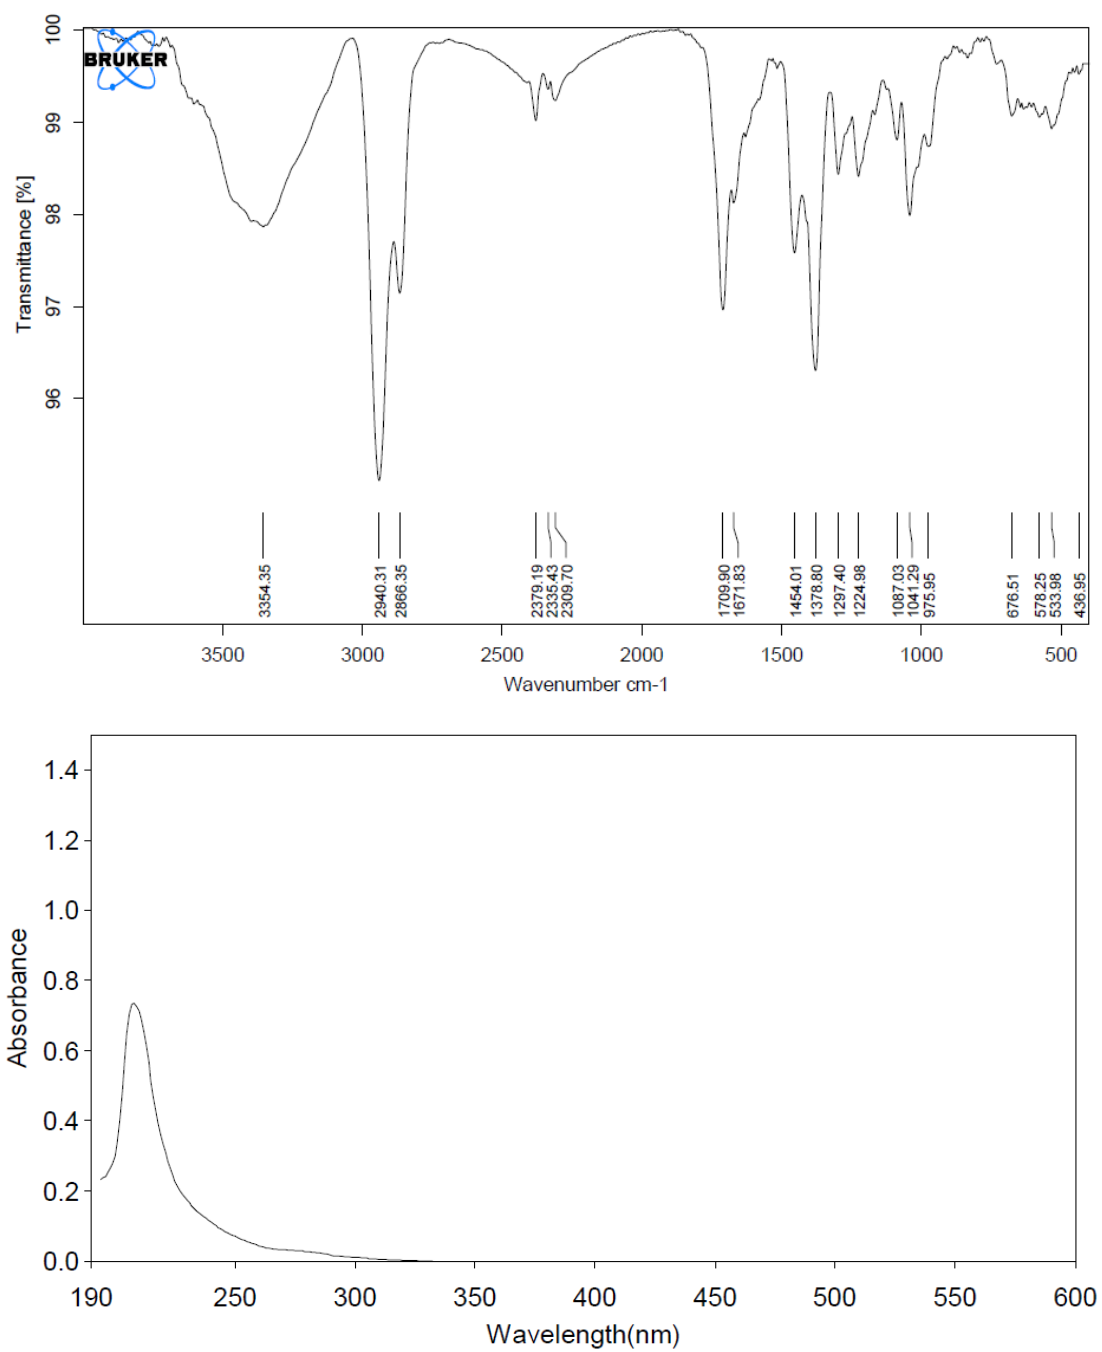

**Figure S41.** <sup>1</sup>H NMR and <sup>13</sup>C spectra of compound **9** in CD<sub>3</sub>OD.

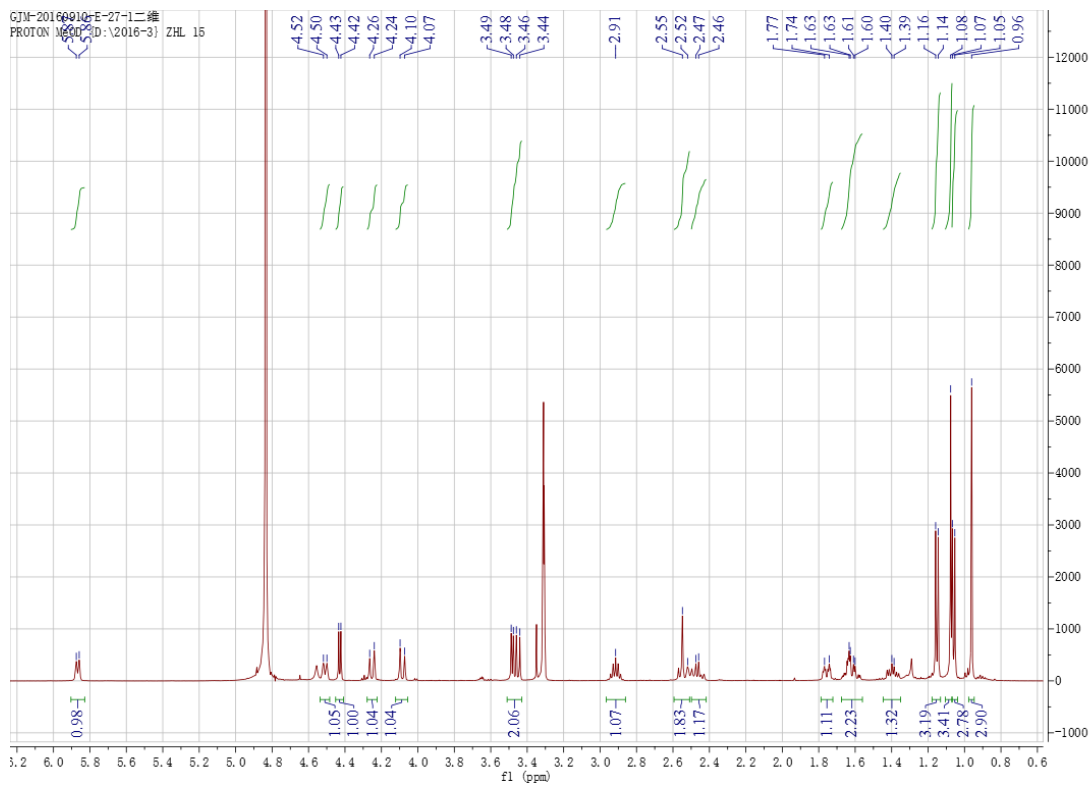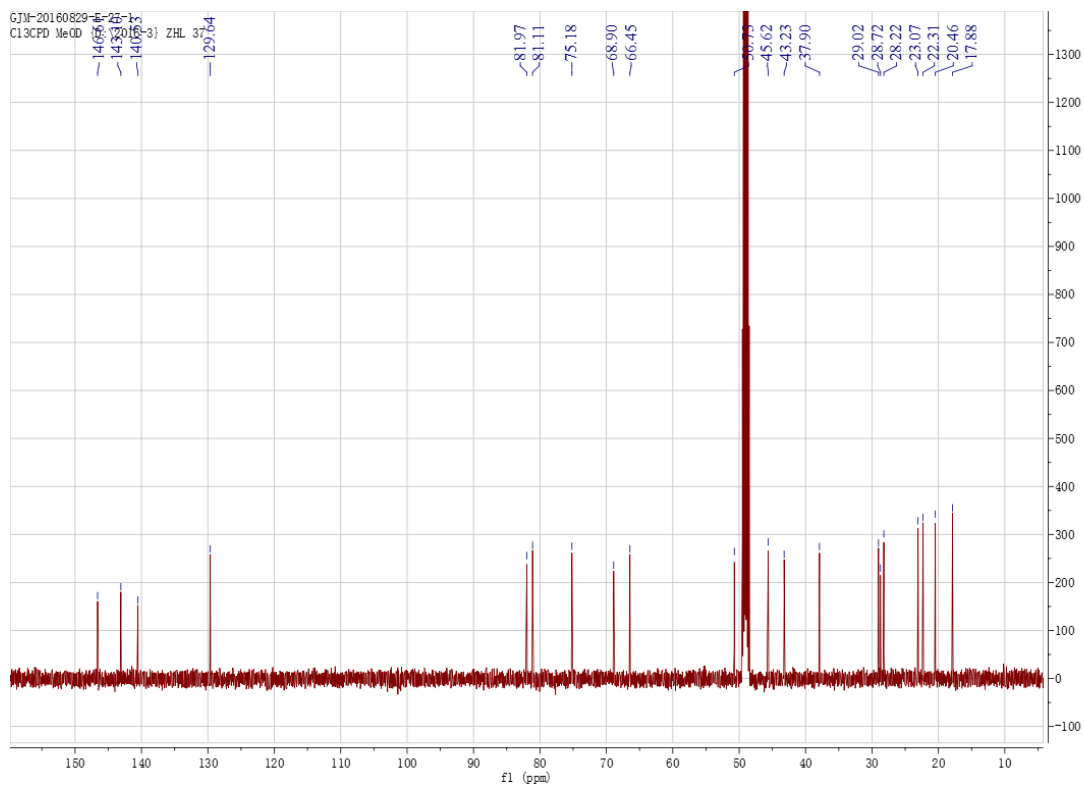

**Figure S42.** HSQC and <sup>1</sup>H-<sup>1</sup>H COSY spectra of compound **9** in CD<sub>3</sub>OD.

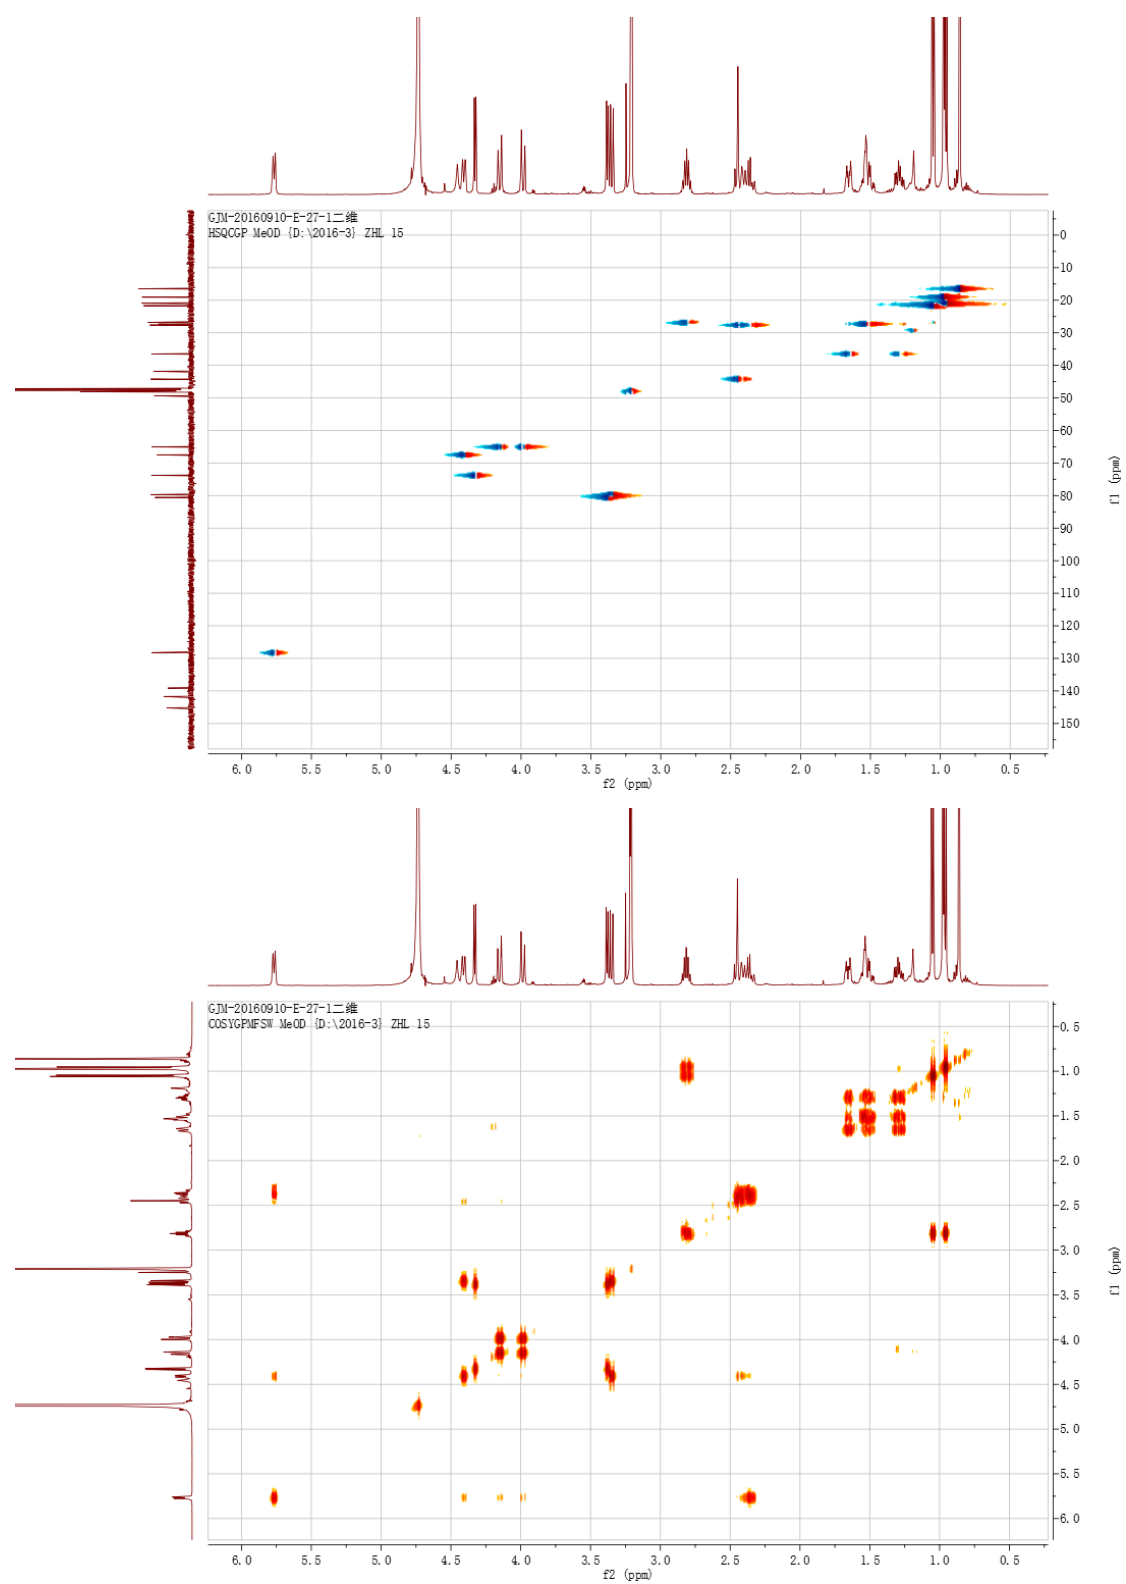

**Figure S43.** HMBC and NOESY spectra of compound **9** in CD<sub>3</sub>OD.



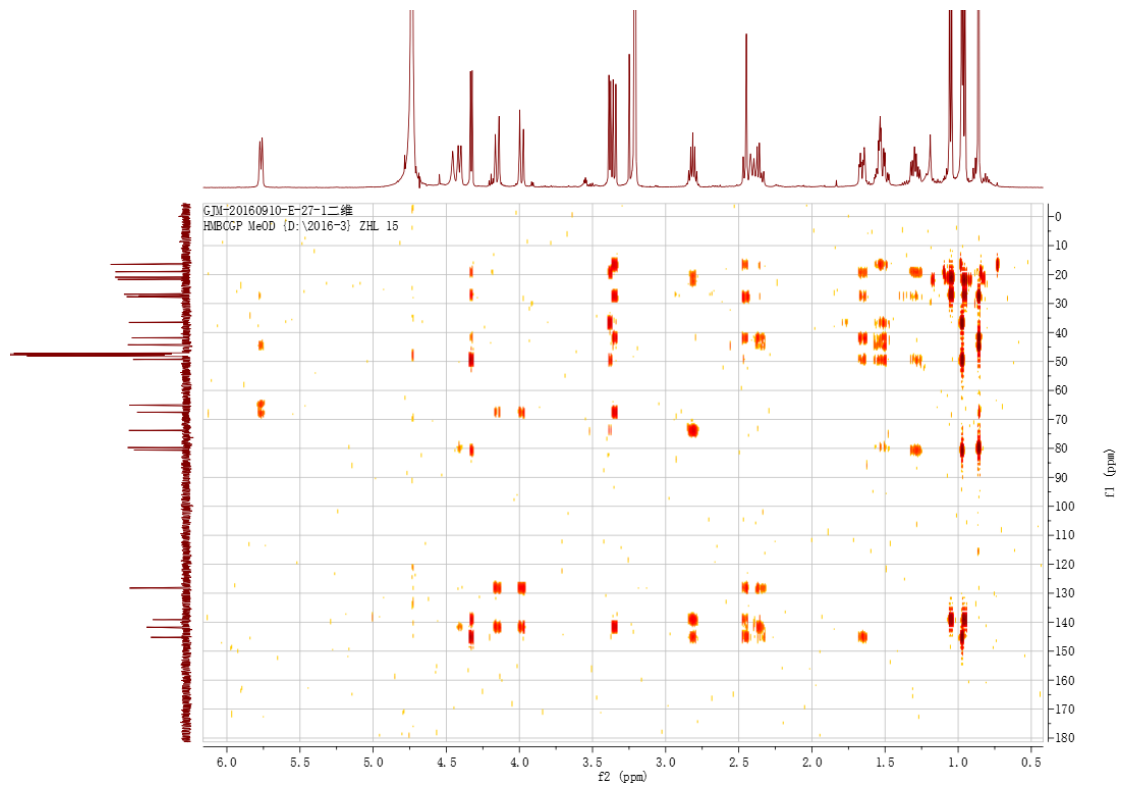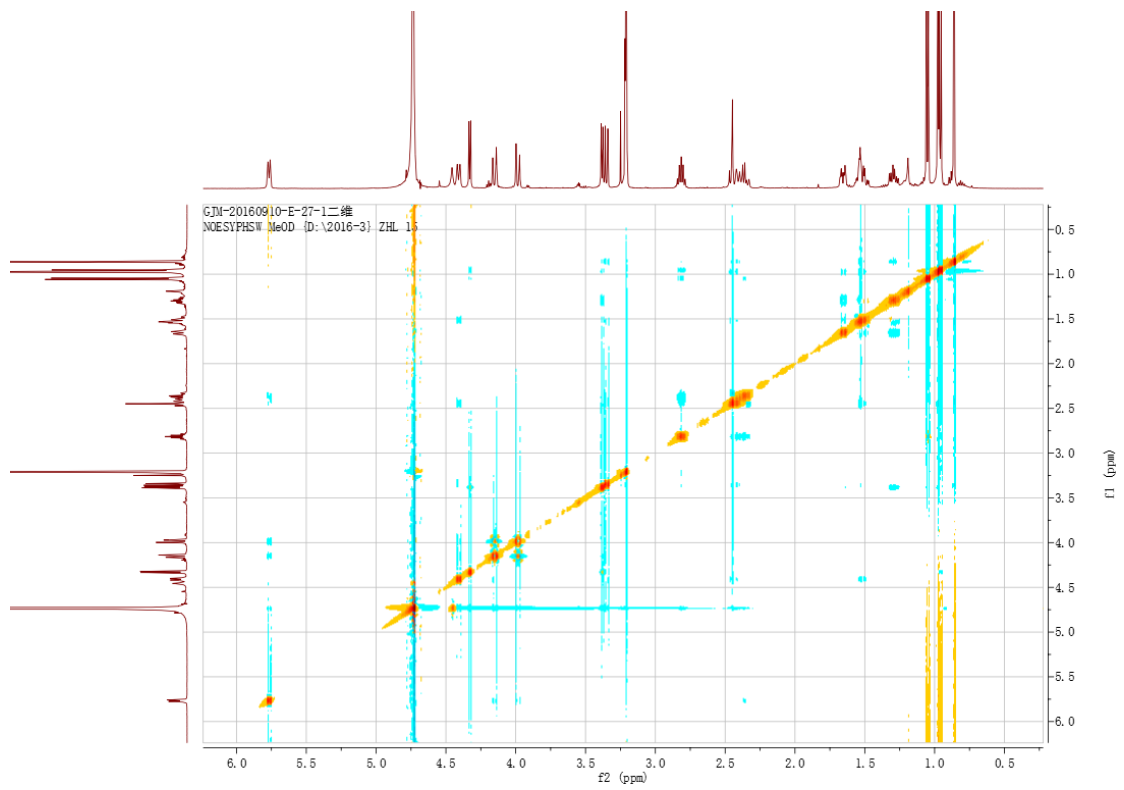

**Figure S44.** HRESIMS spectrum of compound **9**.

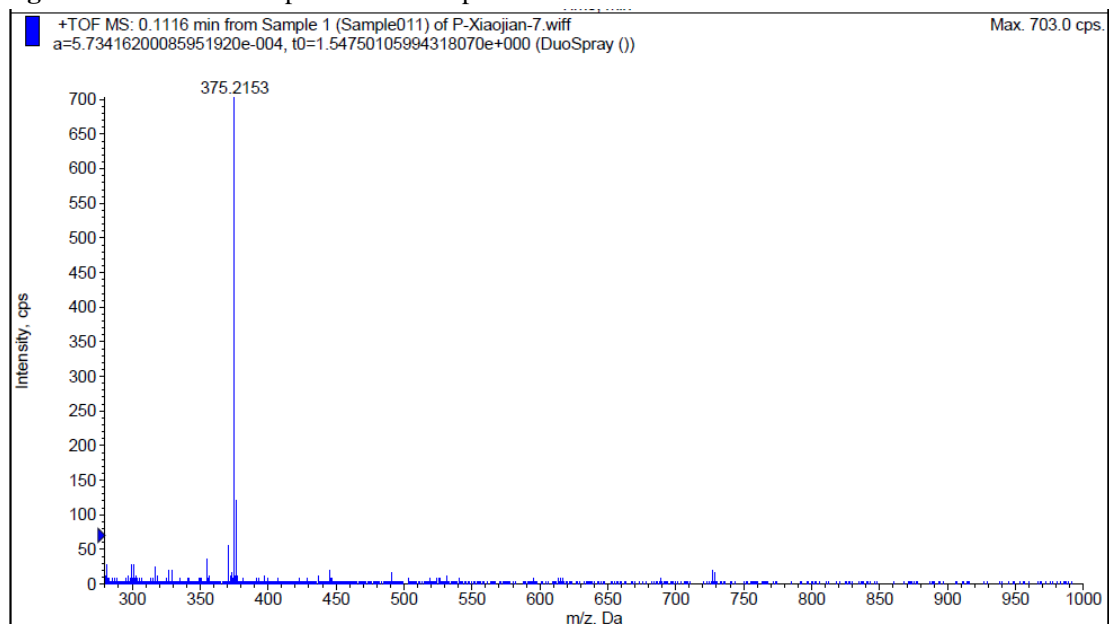

**Figure S45.** IR and UV spectra of compound **9**.

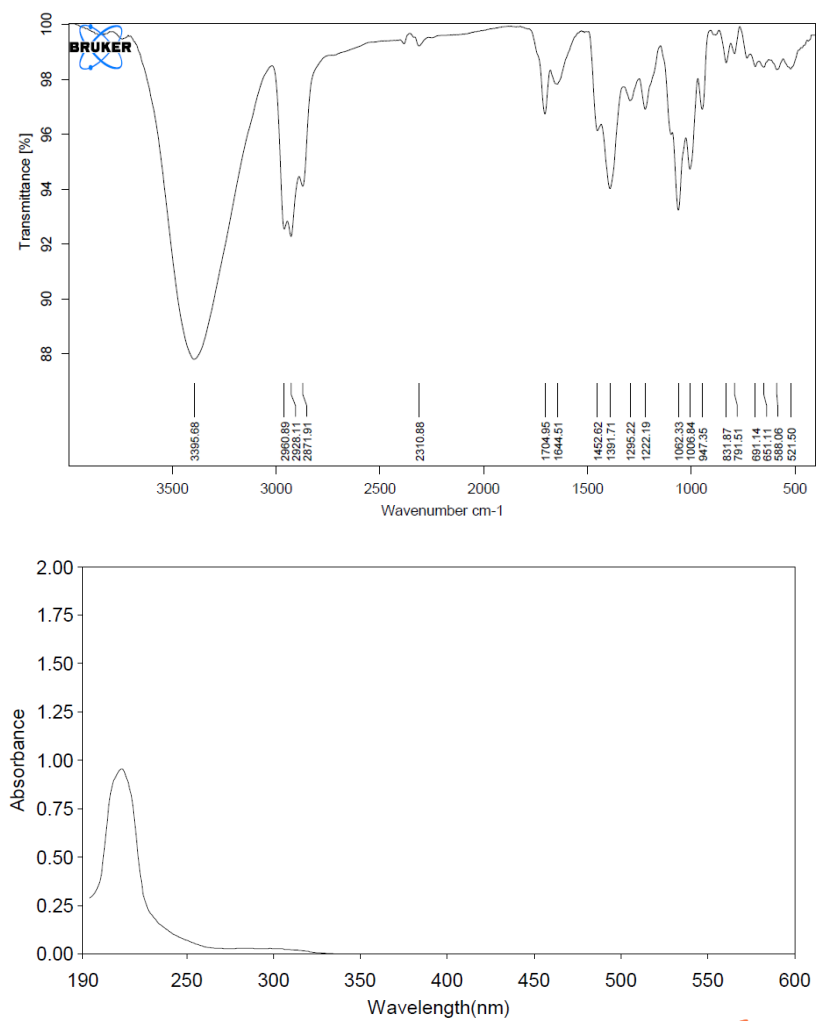

Figure S46.  $^1\text{H}$  NMR and  $^{13}\text{C}$  spectra of compound **10** in  $\text{CD}_3\text{OD}$ .

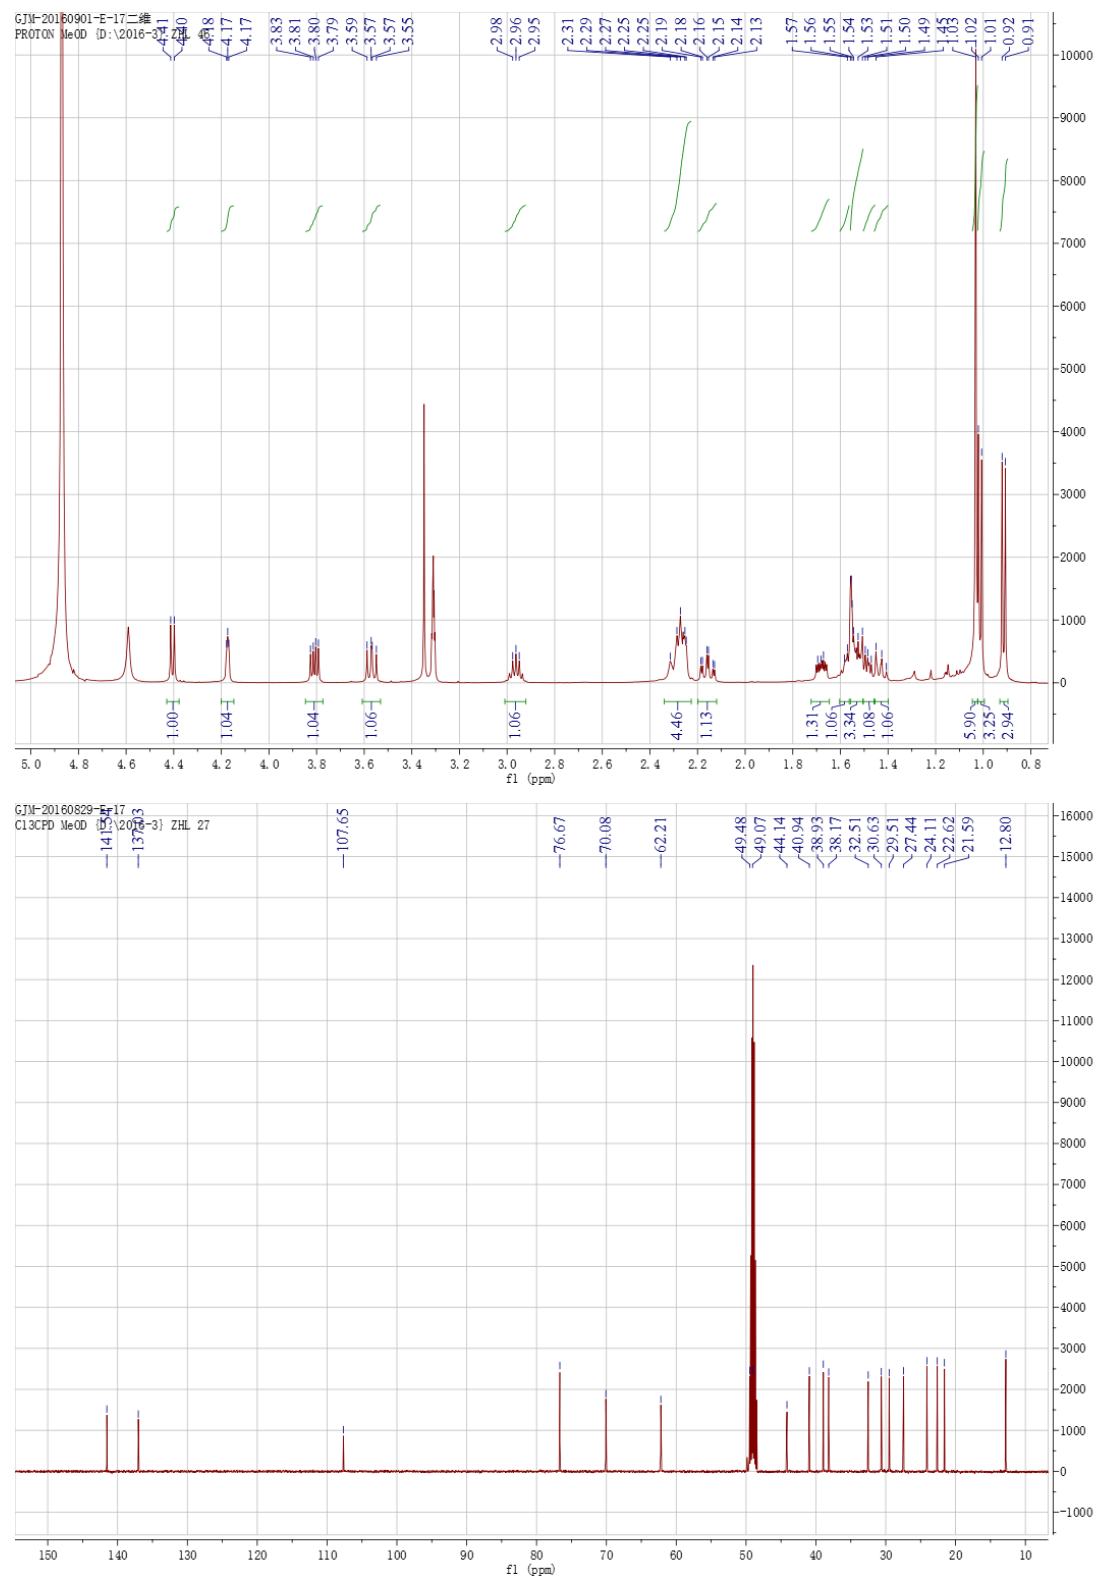

Figure S47. ESIMS spectrum of compound 10.

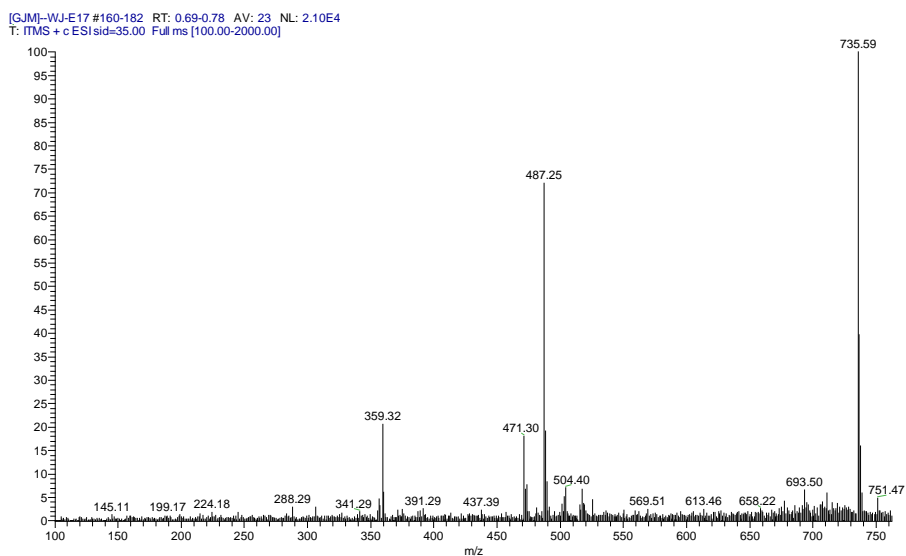

Figure S48.  $^1\text{H}$  NMR and  $^{13}\text{C}$  spectra of compound 11 in  $\text{CD}_3\text{OD}$ .

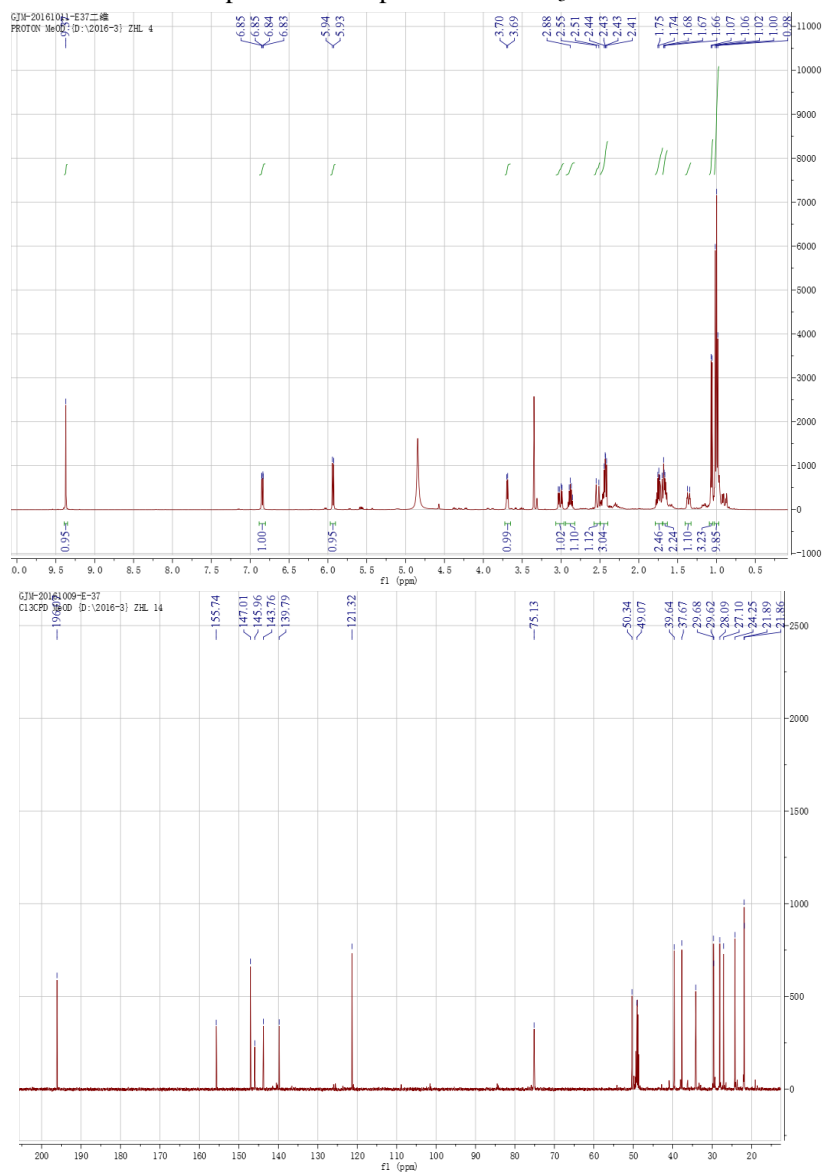

**Figure S49.** ESIMS spectrum of compound **11**.

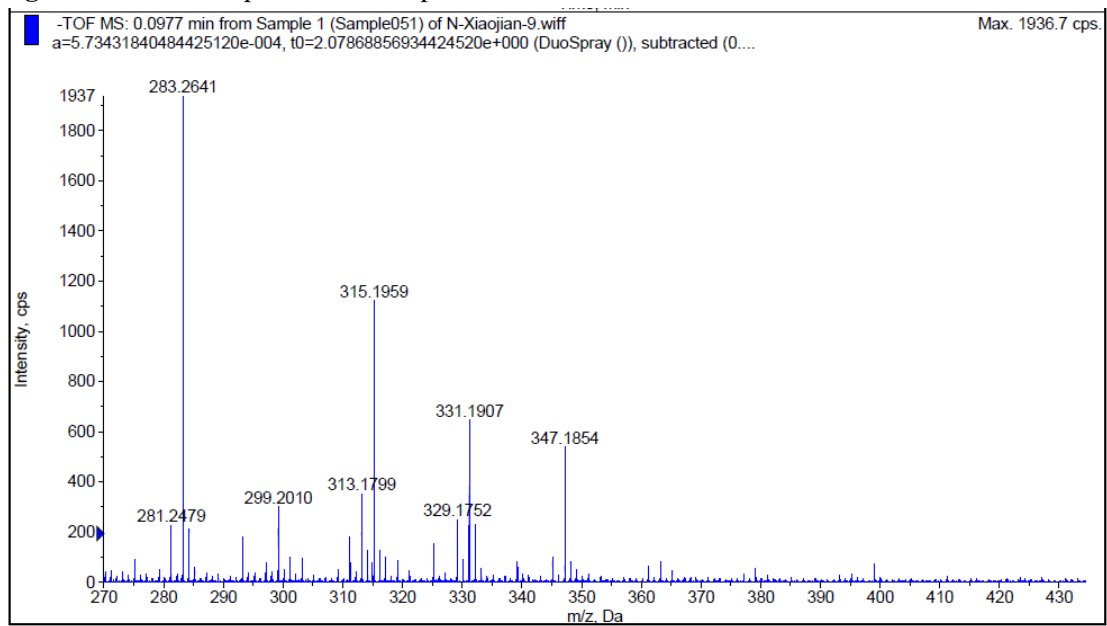

Figure S50.  $^1\text{H}$  NMR and  $^{13}\text{C}$  spectra of compound **6a** in  $\text{CD}_3\text{CN}$ .

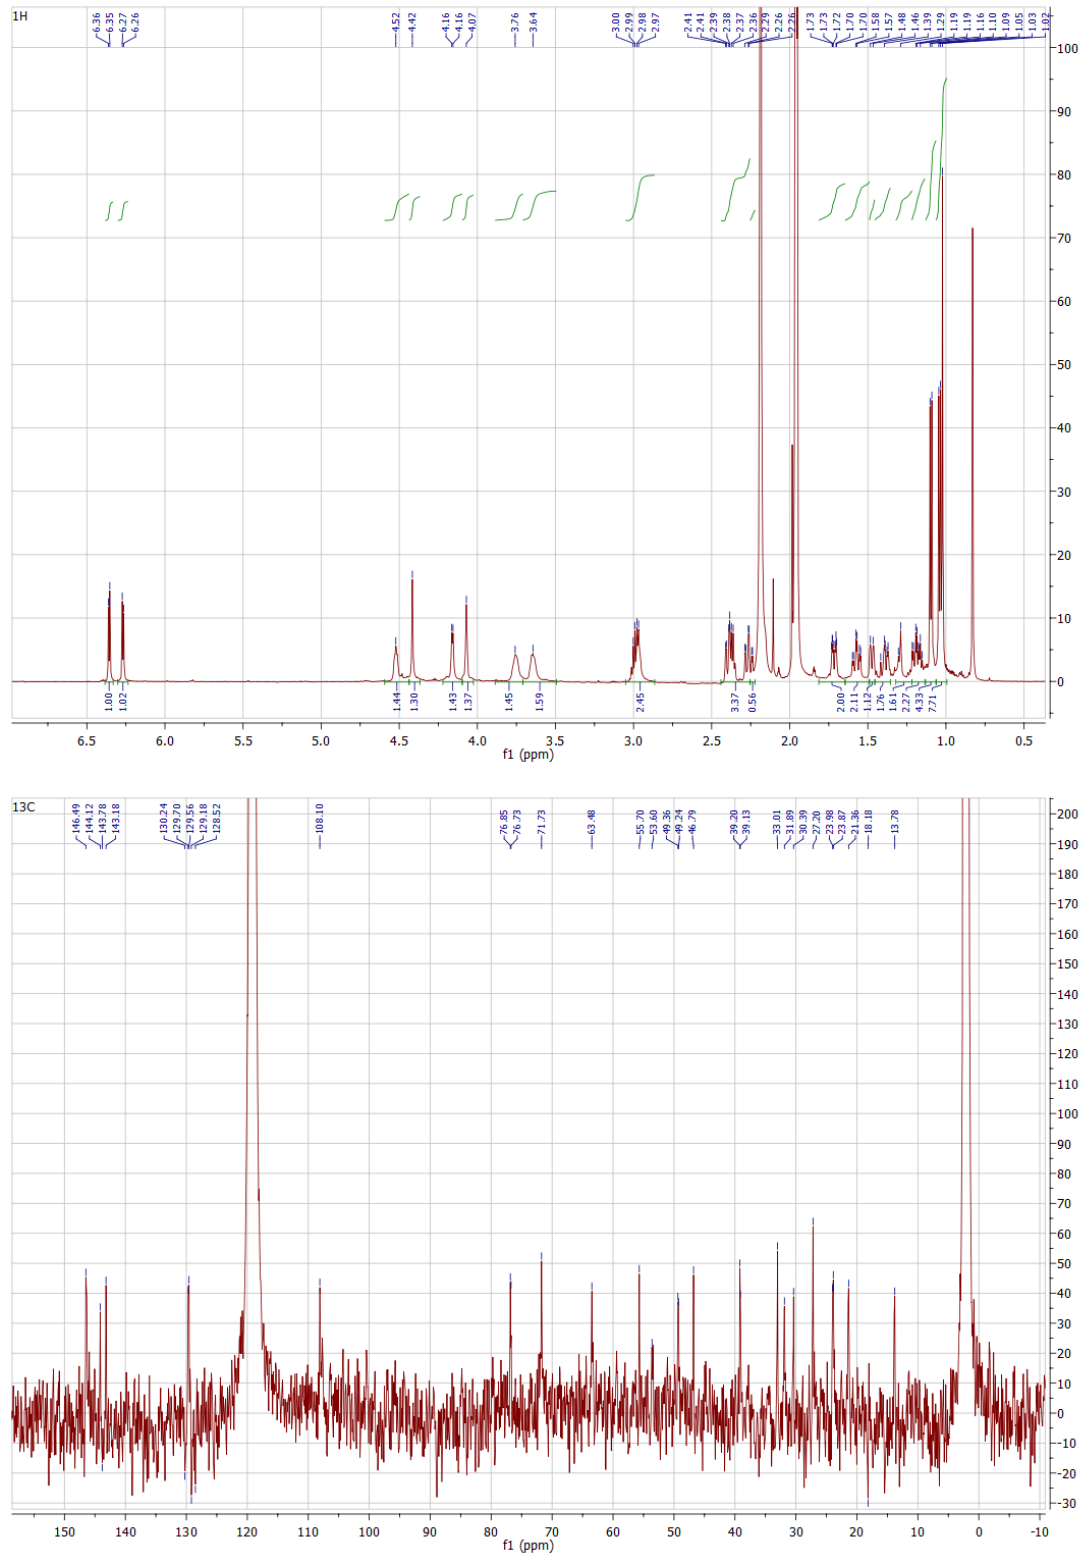

Figure S51. HSQC and  $^1\text{H}$ - $^1\text{H}$  TOCSY spectra of compound **6a** in  $\text{CD}_3\text{CN}$

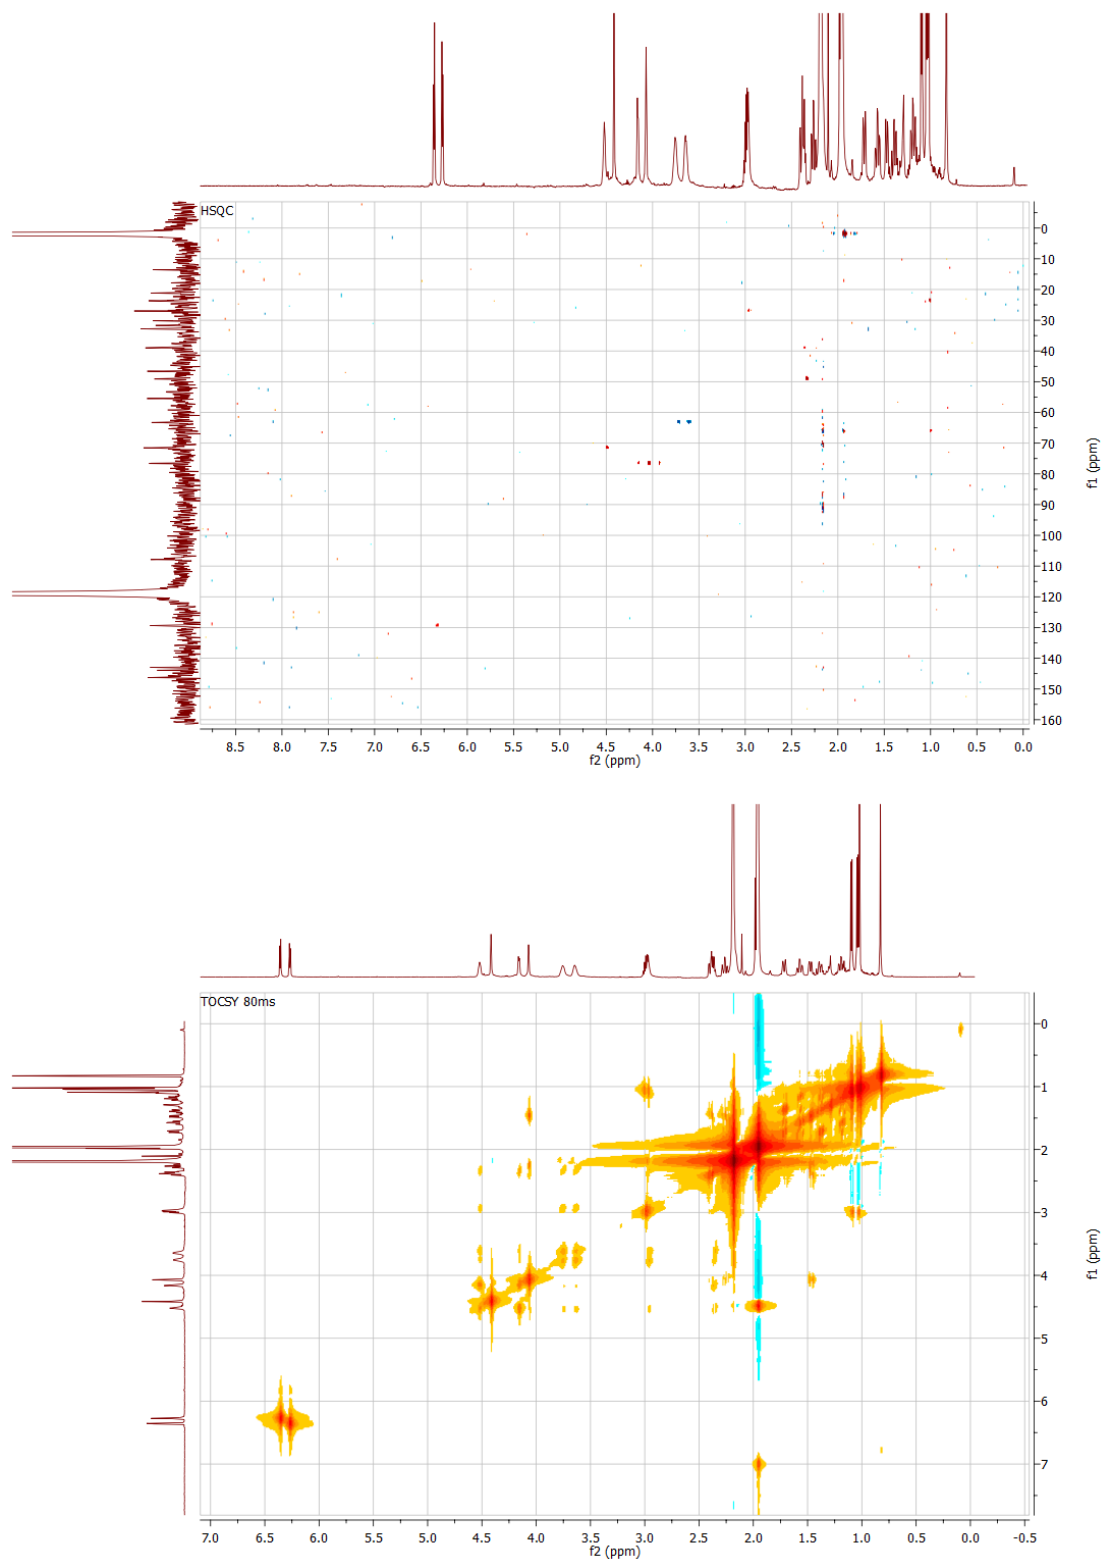

Figure S52. HMBC and ROESY (mixing 200 ms) spectra of compound **6a** in CD<sub>3</sub>CN

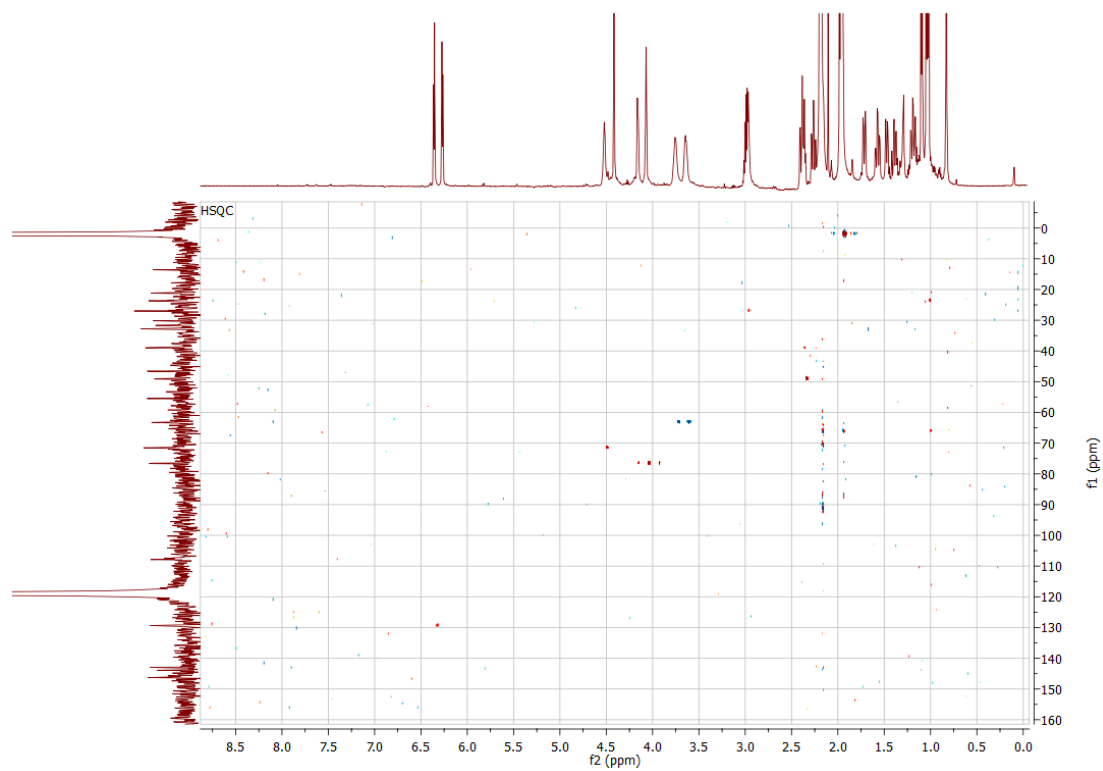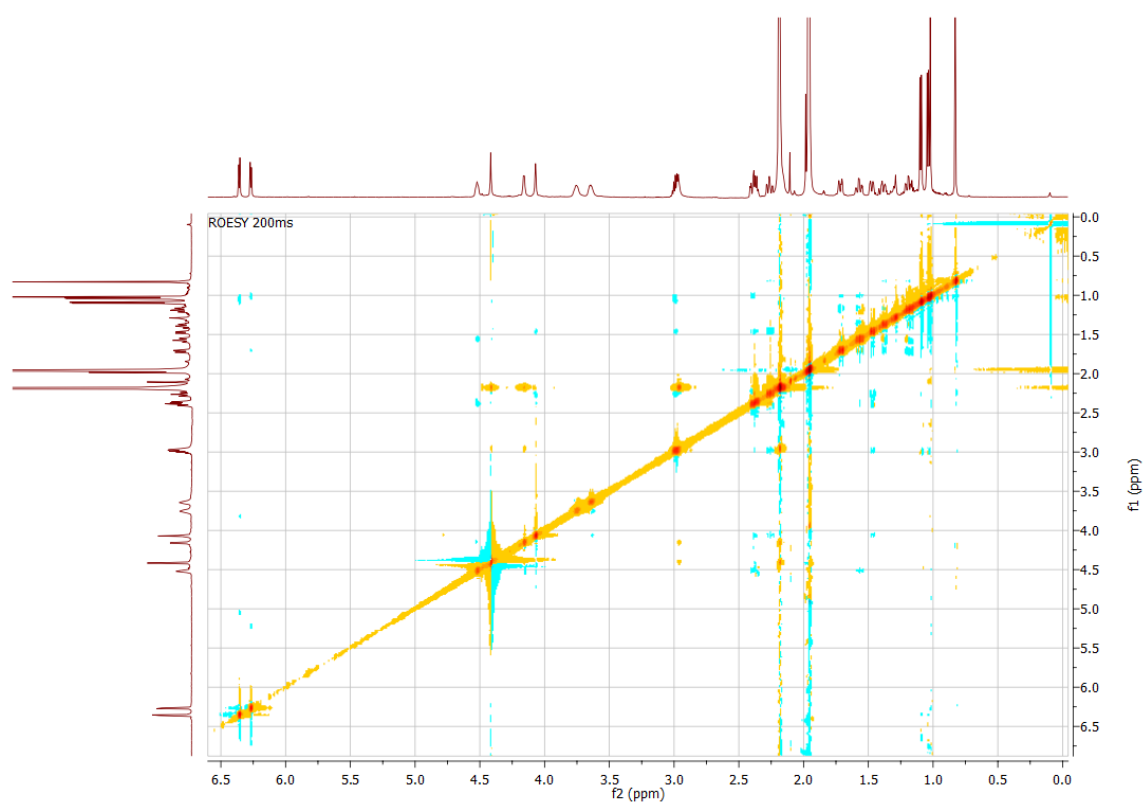



**Figure S53.** Cytotoxicity of the isolated compounds **1-10** to PC-12 cells

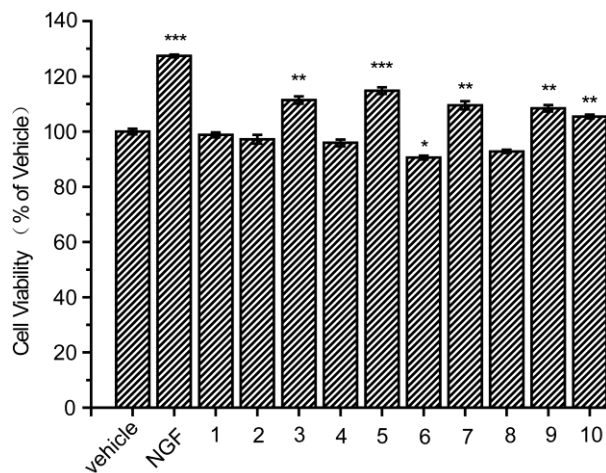

The test compounds at 10  $\mu\text{M}$  for 48 h did not show any toxicity.

**Figure S54.** Effect of compound **1** on the NGF-promoted neurite outgrowth in PC-12 cells

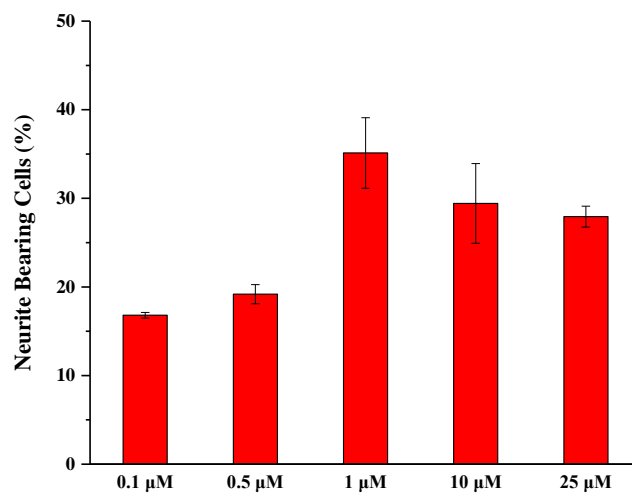

**Table S1.**  $^1\text{H}$  and  $^{13}\text{C}$  data of **9-11**, and cyathin I in  $\text{CD}_3\text{OD}$ .

| No. | <b>9</b>                             |                     | <b>10</b>                                        |                     | <b>11</b>                                  |                     | cyathin I <sup>a</sup>                           |                     |
|-----|--------------------------------------|---------------------|--------------------------------------------------|---------------------|--------------------------------------------|---------------------|--------------------------------------------------|---------------------|
|     | $\delta_{\text{H}}$                  | $\delta_{\text{C}}$ | $\delta_{\text{H}}$                              | $\delta_{\text{C}}$ | $\delta_{\text{H}}$                        | $\delta_{\text{C}}$ | $\delta_{\text{H}}$                              | $\delta_{\text{C}}$ |
| 1   | 3.49 d (6.0)                         | 81.9                | 1.70 m<br>1.43 m                                 | 40.9                | 1.75 m<br>1.68 m                           | 39.6                | 6.25 (d, 5.5)                                    | 145.8               |
| 2   | 4.43 d (6.0)                         | 75.1                | 2.25 m                                           | 29.5                | 2.43 m                                     | 29.6                | 6.34 (d, 5.5)                                    | 128.9               |
| 3   |                                      | 140.5               |                                                  | 141.5               |                                            | 145.9               |                                                  | 143.0               |
| 4   |                                      | 146.6               |                                                  | 137.0               |                                            | 143.7               |                                                  | 143.1               |
| 5   | 2.55 m                               | 45.6                | 2.31 m                                           | 38.9                |                                            | 155.7               | 2.45 (dd, 3.5,<br>13.0)                          | 38.8                |
| 6   |                                      | 43.2                |                                                  | 44.1                |                                            | 49.0                |                                                  | 46.5                |
| 7   | 1.63 2H m                            | 28.7                | 1.56 m<br>1.49 m                                 | 30.6                | 2.44 m<br>1.37 m                           | 34.1                | 1.44 (m); 1.60<br>(td, 4.2, 13.6)                | 29.8                |
| 8   | 1.77 m<br>1.40 m                     | 37.9                | 1.58 m                                           | 38.1                | 1.73 m<br>1.66 m                           | 37.6                | 1.24(td, 4.6,<br>13.6); 1.72<br>(m)              | 32.4                |
| 9   |                                      | 50.7                |                                                  | 49.0                |                                            | 50.3                |                                                  | 55.1                |
| 10  | 2.47 2H m                            | 29.0                | 2.16 td<br>(12.7, 3.5)<br>1.53 m                 | 32.5                | 5.94 d<br>(8.1)                            | 121.3               | 1.52 (m); 2.34<br>(m)                            | 31.6                |
| 11  | 5.87 m                               | 129.6               | 4.17 m                                           | 76.6                | 6.85 dd<br>(8.1, 2.0)                      | 147.0               | 4.24 (t, 3.0)                                    | 76.9                |
| 12  |                                      | 143.1               | 2.29 m                                           | 49.4                |                                            | 139.7               | 2.37 (m)                                         | 49.5                |
| 13  | 4.52 d (9.4)                         | 68.9                | 4.41 d<br>(7.7)                                  | 70.0                | 3.02 dd<br>(17.6, 6.3)<br>2.55 d<br>(17.6) | 29.6                | 4.54 (d, 8.0)                                    | 70.3                |
| 14  | 3.46 d (9.4)                         | 81.1                |                                                  | 107.6               | 3.70 d<br>(6.3)                            | 75.1                |                                                  | 107.8               |
| 15  | 4.26 d<br>(12.7)<br>4.10 d<br>(12.7) | 66.4                | 3.81 dd<br>(10.9, 5.9)<br>3.57 dd<br>(10.9, 8.7) | 62.2                | 9.37 s                                     | 196.0               | 3.61 (dd, 9.0,<br>10.5); 3.85<br>(dd, 5.5, 10.5) | 62.2                |
| 16  | 0.96 s                               | 17.8                | 1.03 s                                           | 12.8                | 1.00 s                                     | 27.1                | 0.89 (s)                                         | 12.9                |
| 17  | 1.08 s                               | 20.4                | 1.03 s                                           | 24.1                | 1.02 s                                     | 24.2                | 1.04 (s)                                         | 20.6                |
| 18  | 2.91 m                               | 28.2                | 2.96 m                                           | 27.4                | 2.88 m                                     | 28.0                | 3.00 (sept,<br>6.8)                              | 26.9                |
| 19  | 1.16 d (6.9)                         | 23.0                | 0.92 d<br>(6.8)                                  | 21.5                | 1.07 d<br>(6.9)                            | 21.8                | 1.07 (d, 6.8)                                    | 23.0                |
| 20  | 1.07 d (6.9)                         | 22.3                | 1.02 d<br>(6.8)                                  | 22.6                | 0.98 d<br>(6.9)                            | 21.8                | 1.12 (d, 6.8)                                    | 23.1                |

<sup>a</sup> data from literature.

**Table S2.** Logarithms of Free Binding Energy of the NO Inhibitor to the Active Cavities of iNOS (PDBcode: 3E7G) and Targeting Residues with Hydrogen of the Binding Site.

|           | iNOS              |                    |
|-----------|-------------------|--------------------|
| compound  | log(FBE) kcal/mol | targeting residues |
| <b>11</b> | -9.22             | ILE462             |
